# Supplementary material for: Transcriptomic Identification of Nitric Oxide–Responsive Genes Associated with Hypoxia Tolerance in Rice
Source: Research Square preprint supplement (doi:10.21203/rs.3.rs-7361395/v1), 2025-08-25
Supplement: Supplementary file 1 [file a244655e07c38fb5c7ebadba.xlsx]

## Sheet: Table 1
Names	total	elements	RKBH1	RKBH2	RKBHL1	RKBHL2	RKBH1	RKBH2	IR64H1	IR64H2
RKBH vs RKBL -RKBH vs IR64H	1	BGIOSGA026664	33	26	149	116	33	26	2	1
Names	total	elements	RKBH1	RKBH2	IR64H1	IR64H2	RKBH1	RKBH2	RKBHL1	RKBHL2
RKBH vs IR64H - RKBH vs RKBL	4	BGIOSGA008467	139	46	984	369	139	46	10	21
RKBH vs IR64H - RKBH vs RKBL	4	BGIOSGA019234	12	10	110	120	12	10	0	0
RKBH vs IR64H - RKBH vs RKBL	4	BGIOSGA021011	123	74	427	361	123	74	9	22
RKBH vs IR64H - RKBH vs RKBL	4	BGIOSGA024868	4	9	23	30	4	9	0	0
Names	total	elements	RKBH1	RKBH2	RKBHL1	RKBHL2	RKBH1	RKBH2	IR64H1	IR64H2
RKBH vs RKBL- RKBH vs IR64H	5	BGIOSGA003085	71	82	279	339	71	82	740	926
RKBH vs RKBL- RKBH vs IR64H	5	BGIOSGA004581	2	0	35	9	2	0	29	8
RKBH vs RKBL- RKBH vs IR64H	5	BGIOSGA019816	6	2	89	51	6	2	22	31
RKBH vs RKBL- RKBH vs IR64H	5	BGIOSGA020094	3	0	11	20	3	0	19	14
RKBH vs RKBL- RKBH vs IR64H	5	BGIOSGA021122	9	6	34	28	9	6	45	37
Names	total	elements	RKBH1	RKBH2	IR64H1	IR64H2	RKBH1	RKBH2	RKBHL1	RKBHL2
RKBH vs RKBL- RKBH vsIR64H	152	BGIOSGA000089	123	113	10	13	123	113	7	0
RKBH vs RKBL- RKBH vsIR64H	152	BGIOSGA000258	33	41	9	2	33	41	0	3
RKBH vs RKBL- RKBH vsIR64H	152	BGIOSGA000344	629	485	38	28	629	485	20	31
RKBH vs RKBL- RKBH vsIR64H	152	BGIOSGA000508	133	138	27	27	133	138	18	4
RKBH vs RKBL- RKBH vsIR64H	152	BGIOSGA001992	565	744	158	130	565	744	60	58
RKBH vs RKBL- RKBH vsIR64H	152	BGIOSGA002472	707	486	65	52	707	486	121	101
RKBH vs RKBL- RKBH vsIR64H	152	BGIOSGA002552	121	174	5	2	121	174	14	2
RKBH vs RKBL- RKBH vsIR64H	152	BGIOSGA002554	435	562	105	49	435	562	86	148
RKBH vs RKBL- RKBH vsIR64H	152	BGIOSGA002818	5	7	0	0	5	7	0	0
RKBH vs RKBL- RKBH vsIR64H	152	BGIOSGA002869	47	36	6	2	47	36	0	1
RKBH vs RKBL- RKBH vsIR64H	152	BGIOSGA003046	195	132	29	22	195	132	22	25
RKBH vs RKBL- RKBH vsIR64H	152	BGIOSGA003465	178	392	27	18	178	392	42	10
RKBH vs RKBL- RKBH vsIR64H	152	BGIOSGA003781	41	30	9	6	41	30	4	3
RKBH vs RKBL- RKBH vsIR64H	152	BGIOSGA003785	17	19	5	1	17	19	1	1
RKBH vs RKBL- RKBH vsIR64H	152	BGIOSGA003830	34	24	0	6	34	24	1	0
RKBH vs RKBL- RKBH vsIR64H	152	BGIOSGA003879	40	73	8	8	40	73	9	2
RKBH vs RKBL- RKBH vsIR64H	152	BGIOSGA003912	365	233	48	59	365	233	61	32
RKBH vs RKBL- RKBH vsIR64H	152	BGIOSGA003922	936	934	56	39	936	934	9	0
RKBH vs RKBL- RKBH vsIR64H	152	BGIOSGA004263	4	8	0	0	4	8	0	0
RKBH vs RKBL- RKBH vsIR64H	152	BGIOSGA004346	205	157	44	20	205	157	33	50
RKBH vs RKBL- RKBH vsIR64H	152	BGIOSGA004351	663	565	87	30	663	565	17	41
RKBH vs RKBL- RKBH vsIR64H	152	BGIOSGA004377	25	43	4	6	25	43	8	5
RKBH vs RKBL- RKBH vsIR64H	152	BGIOSGA004437	1471	1346	241	179	1471	1346	207	202
RKBH vs RKBL- RKBH vsIR64H	152	BGIOSGA004724	26	52	0	0	26	52	0	2
RKBH vs RKBL- RKBH vsIR64H	152	BGIOSGA005065	35	84	0	4	35	84	3	0
RKBH vs RKBL- RKBH vsIR64H	152	BGIOSGA005106	175	124	12	18	175	124	5	4
RKBH vs RKBL- RKBH vsIR64H	152	BGIOSGA005904	14	33	4	3	14	33	0	0
RKBH vs RKBL- RKBH vsIR64H	152	BGIOSGA005957	236	137	3	2	236	137	18	18
RKBH vs RKBL- RKBH vsIR64H	152	BGIOSGA006017	504	359	63	34	504	359	92	92
RKBH vs RKBL- RKBH vsIR64H	152	BGIOSGA006847	29	28	7	3	29	28	7	2
RKBH vs RKBL- RKBH vsIR64H	152	BGIOSGA007024	157	78	2	3	157	78	9	5
RKBH vs RKBL- RKBH vsIR64H	152	BGIOSGA007655	21	13	3	4	21	13	3	3
RKBH vs RKBL- RKBH vsIR64H	152	BGIOSGA009659	30	49	8	4	30	49	4	4
RKBH vs RKBL- RKBH vsIR64H	152	BGIOSGA009672	436	553	137	63	436	553	68	94
RKBH vs RKBL- RKBH vsIR64H	152	BGIOSGA010210	11	25	3	0	11	25	2	2
RKBH vs RKBL- RKBH vsIR64H	152	BGIOSGA010386	340	401	32	28	340	401	63	26
RKBH vs RKBL- RKBH vsIR64H	152	BGIOSGA010776	35	55	0	0	35	55	0	0
RKBH vs RKBL- RKBH vsIR64H	152	BGIOSGA011188	87	36	14	15	87	36	9	18
RKBH vs RKBL- RKBH vsIR64H	152	BGIOSGA011265	20279	12555	1552	1448	20279	12555	1064	1423
RKBH vs RKBL- RKBH vsIR64H	152	BGIOSGA011332	188	71	13	17	188	71	16	27
RKBH vs RKBL- RKBH vsIR64H	152	BGIOSGA011443	18	17	4	0	18	17	0	1
RKBH vs RKBL- RKBH vsIR64H	152	BGIOSGA011561	554	192	10	16	554	192	28	65
RKBH vs RKBL- RKBH vsIR64H	152	BGIOSGA011834	2404	1561	540	412	2404	1561	361	400
RKBH vs RKBL- RKBH vsIR64H	152	BGIOSGA011983	664	241	33	88	664	241	14	17
RKBH vs RKBL- RKBH vsIR64H	152	BGIOSGA012041	279	495	94	85	279	495	16	3
RKBH vs RKBL- RKBH vsIR64H	152	BGIOSGA012046	39	39	10	3	39	39	0	6
RKBH vs RKBL- RKBH vsIR64H	152	BGIOSGA012259	20	38	6	0	20	38	2	0
RKBH vs RKBL- RKBH vsIR64H	152	BGIOSGA012679	44	58	6	8	44	58	5	8
RKBH vs RKBL- RKBH vsIR64H	152	BGIOSGA012707	58	156	33	5	58	156	0	2
RKBH vs RKBL- RKBH vsIR64H	152	BGIOSGA012711	1430	1090	290	184	1430	1090	297	248
RKBH vs RKBL- RKBH vsIR64H	152	BGIOSGA013051	103	109	8	4	103	109	2	1
RKBH vs RKBL- RKBH vsIR64H	152	BGIOSGA013052	664	967	130	60	664	967	22	39
RKBH vs RKBL- RKBH vsIR64H	152	BGIOSGA013525	741	631	24	19	741	631	0	0
RKBH vs RKBL- RKBH vsIR64H	152	BGIOSGA014216	17	21	0	5	17	21	3	1
RKBH vs RKBL- RKBH vsIR64H	152	BGIOSGA014550	146	92	11	9	146	92	5	8
RKBH vs RKBL- RKBH vsIR64H	152	BGIOSGA014920	15	13	3	0	15	13	1	0
RKBH vs RKBL- RKBH vsIR64H	152	BGIOSGA015766	929	535	122	134	929	535	29	47
RKBH vs RKBL- RKBH vsIR64H	152	BGIOSGA016539	298	584	78	72	298	584	107	73
RKBH vs RKBL- RKBH vsIR64H	152	BGIOSGA016756	126	131	27	21	126	131	20	28
RKBH vs RKBL- RKBH vsIR64H	152	BGIOSGA016782	377	223	22	25	377	223	28	87
RKBH vs RKBL- RKBH vsIR64H	152	BGIOSGA017002	495	247	65	61	495	247	70	100
RKBH vs RKBL- RKBH vsIR64H	152	BGIOSGA017212	41	10	3	3	41	10	3	0
RKBH vs RKBL- RKBH vsIR64H	152	BGIOSGA017287	145	76	26	24	145	76	15	28
RKBH vs RKBL- RKBH vsIR64H	152	BGIOSGA017380	63	75	10	7	63	75	0	5
RKBH vs RKBL- RKBH vsIR64H	152	BGIOSGA018537	20	36	0	0	20	36	0	2
RKBH vs RKBL- RKBH vsIR64H	152	BGIOSGA018676	100	92	23	21	100	92	15	19
RKBH vs RKBL- RKBH vsIR64H	152	BGIOSGA019036	1810	1283	368	305	1810	1283	242	324
RKBH vs RKBL- RKBH vsIR64H	152	BGIOSGA019700	58	44	0	0	58	44	5	10
RKBH vs RKBL- RKBH vsIR64H	152	BGIOSGA020130	317	241	68	43	317	241	34	38
RKBH vs RKBL- RKBH vsIR64H	152	BGIOSGA020478	776	358	9	24	776	358	57	110
RKBH vs RKBL- RKBH vsIR64H	152	BGIOSGA020509	518	440	44	54	518	440	18	14
RKBH vs RKBL- RKBH vsIR64H	152	BGIOSGA021069	374	732	53	36	374	732	66	34
RKBH vs RKBL- RKBH vsIR64H	152	BGIOSGA021349	78	37	0	0	78	37	0	0
RKBH vs RKBL- RKBH vsIR64H	152	BGIOSGA021352	369	486	143	58	369	486	75	88
RKBH vs RKBL- RKBH vsIR64H	152	BGIOSGA021590	6	26	4	2	6	26	0	0
RKBH vs RKBL- RKBH vsIR64H	152	BGIOSGA021931	18	21	4	5	18	21	4	2
RKBH vs RKBL- RKBH vsIR64H	152	BGIOSGA022584	4	19	0	0	4	19	0	0
RKBH vs RKBL- RKBH vsIR64H	152	BGIOSGA022800	846	1403	214	126	846	1403	158	108
RKBH vs RKBL- RKBH vsIR64H	152	BGIOSGA023517	42	32	5	9	42	32	12	2
RKBH vs RKBL- RKBH vsIR64H	152	BGIOSGA023632	175	151	12	27	175	151	8	23
RKBH vs RKBL- RKBH vsIR64H	152	BGIOSGA023633	5804	3502	495	1128	5804	3502	906	1197
RKBH vs RKBL- RKBH vsIR64H	152	BGIOSGA023745	3	6	0	0	3	6	0	0
RKBH vs RKBL- RKBH vsIR64H	152	BGIOSGA023812	83	67	12	8	83	67	1	6
RKBH vs RKBL- RKBH vsIR64H	152	BGIOSGA023848	17	38	4	0	17	38	0	0
RKBH vs RKBL- RKBH vsIR64H	152	BGIOSGA024179	75	101	24	7	75	101	10	4
RKBH vs RKBL- RKBH vsIR64H	152	BGIOSGA024656	8	16	0	1	8	16	0	0
RKBH vs RKBL- RKBH vsIR64H	152	BGIOSGA024841	343	746	105	48	343	746	130	98
RKBH vs RKBL- RKBH vsIR64H	152	BGIOSGA025130	18	23	0	0	18	23	0	0
RKBH vs RKBL- RKBH vsIR64H	152	BGIOSGA025132	8	5	0	0	8	5	0	0
RKBH vs RKBL- RKBH vsIR64H	152	BGIOSGA025234	30	52	15	5	30	52	0	0
RKBH vs RKBL- RKBH vsIR64H	152	BGIOSGA025240	11	23	0	0	11	23	0	0
RKBH vs RKBL- RKBH vsIR64H	152	BGIOSGA026003	384	689	74	97	384	689	102	86
RKBH vs RKBL- RKBH vsIR64H	152	BGIOSGA026384	66	68	2	8	66	68	3	4
RKBH vs RKBL- RKBH vsIR64H	152	BGIOSGA026405	84	186	39	18	84	186	39	6
RKBH vs RKBL- RKBH vsIR64H	152	BGIOSGA026414	448	287	86	64	448	287	58	71
RKBH vs RKBL- RKBH vsIR64H	152	BGIOSGA026484	693	1509	221	165	693	1509	283	169
RKBH vs RKBL- RKBH vsIR64H	152	BGIOSGA026769	5	4	0	0	5	4	0	0
RKBH vs RKBL- RKBH vsIR64H	152	BGIOSGA027114	22	33	6	2	22	33	2	2
RKBH vs RKBL- RKBH vsIR64H	152	BGIOSGA027173	59	40	20	1	59	40	0	0
RKBH vs RKBL- RKBH vsIR64H	152	BGIOSGA027445	86	68	0	0	86	68	0	0
RKBH vs RKBL- RKBH vsIR64H	152	BGIOSGA027798	18	44	6	4	18	44	2	3
RKBH vs RKBL- RKBH vsIR64H	152	BGIOSGA027799	719	1521	252	155	719	1521	190	115
RKBH vs RKBL- RKBH vsIR64H	152	BGIOSGA027833	27	31	2	1	27	31	0	1
RKBH vs RKBL- RKBH vsIR64H	152	BGIOSGA028110	67	46	10	0	67	46	0	0
RKBH vs RKBL- RKBH vsIR64H	152	BGIOSGA028468	173	306	90	23	173	306	22	19
RKBH vs RKBL- RKBH vsIR64H	152	BGIOSGA029174	314	113	52	15	314	113	16	18
RKBH vs RKBL- RKBH vsIR64H	152	BGIOSGA029364	582	999	39	23	582	999	6	1
RKBH vs RKBL- RKBH vsIR64H	152	BGIOSGA029891	23	14	4	2	23	14	0	6
RKBH vs RKBL- RKBH vsIR64H	152	BGIOSGA029951	122	102	5	2	122	102	9	16
RKBH vs RKBL- RKBH vsIR64H	152	BGIOSGA030166	2	10	0	0	2	10	0	0
RKBH vs RKBL- RKBH vsIR64H	152	BGIOSGA030296	1203	738	120	92	1203	738	136	274
RKBH vs RKBL- RKBH vsIR64H	152	BGIOSGA030410	86	159	15	10	86	159	40	18
RKBH vs RKBL- RKBH vsIR64H	152	BGIOSGA030578	125	225	46	28	125	225	41	12
RKBH vs RKBL- RKBH vsIR64H	152	BGIOSGA031018	1153	959	232	169	1153	959	192	283
RKBH vs RKBL- RKBH vsIR64H	152	BGIOSGA031076	8	7	0	0	8	7	0	0
RKBH vs RKBL- RKBH vsIR64H	152	BGIOSGA031549	25	62	4	2	25	62	6	0
RKBH vs RKBL- RKBH vsIR64H	152	BGIOSGA031784	131	151	9	8	131	151	2	2
RKBH vs RKBL- RKBH vsIR64H	152	BGIOSGA031785	189	101	11	14	189	101	4	12
RKBH vs RKBL- RKBH vsIR64H	152	BGIOSGA031786	561	260	4	10	561	260	3	2
RKBH vs RKBL- RKBH vsIR64H	152	BGIOSGA031788	421	342	42	12	421	342	42	18
RKBH vs RKBL- RKBH vsIR64H	152	BGIOSGA031793	220	177	33	9	220	177	2	0
RKBH vs RKBL- RKBH vsIR64H	152	BGIOSGA032167	61	43	11	12	61	43	3	4
RKBH vs RKBL- RKBH vsIR64H	152	BGIOSGA032270	122	47	16	15	122	47	5	10
RKBH vs RKBL- RKBH vsIR64H	152	BGIOSGA032416	4	12	0	0	4	12	0	0
RKBH vs RKBL- RKBH vsIR64H	152	BGIOSGA032537	411	737	53	107	411	737	158	69
RKBH vs RKBL- RKBH vsIR64H	152	BGIOSGA032580	17	13	3	1	17	13	0	2
RKBH vs RKBL- RKBH vsIR64H	152	BGIOSGA032680	698	748	156	101	698	748	179	150
RKBH vs RKBL- RKBH vsIR64H	152	BGIOSGA032683	51	60	18	9	51	60	12	11
RKBH vs RKBL- RKBH vsIR64H	152	BGIOSGA032689	1345	726	89	57	1345	726	59	141
RKBH vs RKBL- RKBH vsIR64H	152	BGIOSGA032853	75	20	0	0	75	20	3	2
RKBH vs RKBL- RKBH vsIR64H	152	BGIOSGA032920	126	111	6	2	126	111	10	16
RKBH vs RKBL- RKBH vsIR64H	152	BGIOSGA033067	1682	1591	187	54	1682	1591	254	114
RKBH vs RKBL- RKBH vsIR64H	152	BGIOSGA033720	26	41	0	2	26	41	0	0
RKBH vs RKBL- RKBH vsIR64H	152	BGIOSGA033828	51	44	5	4	51	44	0	0
RKBH vs RKBL- RKBH vsIR64H	152	BGIOSGA034158	163	205	7	7	163	205	62	19
RKBH vs RKBL- RKBH vsIR64H	152	BGIOSGA034434	76	396	35	12	76	396	3	2
RKBH vs RKBL- RKBH vsIR64H	152	BGIOSGA034682	129	116	8	12	129	116	0	0
RKBH vs RKBL- RKBH vsIR64H	152	BGIOSGA034755	43	97	10	6	43	97	4	6
RKBH vs RKBL- RKBH vsIR64H	152	BGIOSGA034967	255	381	25	15	255	381	6	3
RKBH vs RKBL- RKBH vsIR64H	152	BGIOSGA035064	1203	2290	175	112	1203	2290	257	178
RKBH vs RKBL- RKBH vsIR64H	152	BGIOSGA035979	2019	1882	92	87	2019	1882	44	11
RKBH vs RKBL- RKBH vsIR64H	152	BGIOSGA035981	143	208	11	15	143	208	18	4
RKBH vs RKBL- RKBH vsIR64H	152	BGIOSGA036323	54	105	0	0	54	105	2	2
RKBH vs RKBL- RKBH vsIR64H	152	BGIOSGA037260	232	220	22	6	232	220	12	12
RKBH vs RKBL- RKBH vsIR64H	152	BGIOSGA037300	10	43	2	0	10	43	0	2
RKBH vs RKBL- RKBH vsIR64H	152	BGIOSGA037302	113	169	6	3	113	169	4	3
RKBH vs RKBL- RKBH vsIR64H	152	BGIOSGA037321	98	96	3	3	98	96	0	0
RKBH vs RKBL- RKBH vsIR64H	152	BGIOSGA037378	48	70	0	0	48	70	0	0
RKBH vs RKBL- RKBH vsIR64H	152	BGIOSGA037632	1025	1667	0	6	1025	1667	19	19
RKBH vs RKBL- RKBH vsIR64H	152	BGIOSGA037633	3369	5676	361	337	3369	5676	462	168
RKBH vs RKBL- RKBH vsIR64H	152	BGIOSGA038325	5	23	2	0	5	23	0	1
RKBH vs RKBL- RKBH vsIR64H	152	BGIOSGA040566	103	139	7	12	103	139	27	25
