# Supplementary material for: Transcriptomic Identification of Nitric Oxide–Responsive Genes Associated with Hypoxia Tolerance in Rice
Source: Research Square preprint supplement (doi:10.21203/rs.3.rs-7361395/v1), 2025-08-25
Supplement: Supplementary file 2 [file a631f8dab7d16961b776a43a.xlsx]

## Sheet: ReadCount
	IR64A1	IR64A2	sumIR64A	IR64H1	IR64H2	sumIR64H	RKBA1	RKBA2	sumRKBA	RKBH1	RKBH2	sumRKBH	RKBHL1	RKBHL2	sumRKBHL
BGIOSGA000001	2346	3303	5649	817	550	1367	1031	1131	2162	541	702	1243	425	308	733
BGIOSGA000002	3898	3391	7289	9530	7017	16547	2432	3148	5580	7586	7855	15441	6303	6435	12738
BGIOSGA000003	23	21	44	96	92	188	43	46	89	113	59	172	57	44	101
BGIOSGA000004	275	221	496	364	261	625	186	281	467	345	323	668	189	211	400
BGIOSGA000005	347	137	484	628	435	1063	149	225	374	368	377	745	459	423	882
BGIOSGA000006	788	666	1454	941	585	1526	512	591	1103	711	742	1453	709	761	1470
BGIOSGA000007	595	477	1072	1133	761	1894	378	489	867	1000	953	1953	1137	927	2064
BGIOSGA000008	53	20	73	573	599	1172	10	14	24	7	16	23	17	12	29
BGIOSGA000009	2875	1774	4649	4103	3023	7126	1657	1909	3566	3681	4475	8156	3060	3361	6421
BGIOSGA000010	1382	391	1773	1167	985	2152	1211	1260	2471	962	1133	2095	1047	822	1869
BGIOSGA000011	295	359	654	242	149	391	376	367	743	190	180	370	252	222	474
BGIOSGA000012	194	150	344	288	208	496	127	180	307	147	152	299	424	427	851
BGIOSGA000013	283	191	474	318	197	515	131	159	290	184	247	431	322	278	600
BGIOSGA000014	1432	1091	2523	2489	1949	4438	897	1063	1960	2425	2759	5184	2361	2235	4596
BGIOSGA000015	127	89	216	99	99	198	205	240	445	130	226	356	200	111	311
BGIOSGA000016	453	325	778	540	415	955	30	57	87	216	194	410	206	189	395
BGIOSGA000017	181	182	363	163	123	286	84	123	207	124	121	245	85	82	167
BGIOSGA000018	63	94	157	54	64	118	176	223	399	59	52	111	62	70	132
BGIOSGA000019	81	27	108	0	2	2	9	12	21	2	0	2	0	0	0
BGIOSGA000020	1150	625	1775	2441	1705	4146	957	1037	1994	2171	2389	4560	2106	2147	4253
BGIOSGA000021	0	0	0	0	0	0	3	4	7	0	0	0	0	0	0
BGIOSGA000022	0	0	0	0	0	0	0	0	0	0	0	0	0	0	0
BGIOSGA000023	56	98	154	23	23	46	24	39	63	32	10	42	17	18	35
BGIOSGA000024	264	166	430	196	182	378	190	182	372	190	205	395	328	270	598
BGIOSGA000025	36	23	59	36	30	66	10	10	20	20	26	46	23	35	58
BGIOSGA000026	69	75	144	118	82	200	42	59	101	65	82	147	85	87	172
BGIOSGA000027	691	778	1469	922	586	1508	619	816	1435	871	995	1866	835	740	1575
BGIOSGA000028	316	128	444	870	527	1397	170	217	387	566	573	1139	503	491	994
BGIOSGA000029	263	292	555	248	184	432	259	283	542	329	349	678	567	435	1002
BGIOSGA000030	638	850	1488	773	567	1340	241	251	492	165	163	328	146	161	307
BGIOSGA000031	0	0	0	0	0	0	1	2	3	0	1	1	1	0	1
BGIOSGA000032	256	333	589	383	258	641	122	171	293	174	205	379	178	192	370
BGIOSGA000033	327	214	541	381	251	632	432	533	965	980	1064	2044	784	596	1380
BGIOSGA000034	65	42	107	67	47	114	135	140	275	80	79	159	110	103	213
BGIOSGA000035	3716	1804	5520	4621	3926	8547	2988	3426	6414	3857	5126	8983	3654	3413	7067
BGIOSGA000036	151	107	258	118	98	216	262	282	544	210	200	410	243	238	481
BGIOSGA000037	0	0	0	0	0	0	0	0	0	0	0	0	1	0	1
BGIOSGA000038	6	3	9	5	9	14	0	0	0	3	3	6	0	2	2
BGIOSGA000039	1	0	1	2	0	2	0	0	0	0	0	0	0	0	0
BGIOSGA000040	100	38	138	303	134	437	1	3	4	2	5	7	0	10	10
BGIOSGA000041	206	92	298	376	203	579	111	160	271	242	259	501	224	220	444
BGIOSGA000042	0	0	0	0	0	0	0	0	0	3	2	5	4	2	6
BGIOSGA000043	0	0	0	0	0	0	0	0	0	0	0	0	0	0	0
BGIOSGA000044	0	0	0	0	0	0	1	4	5	0	0	0	0	4	4
BGIOSGA000045	740	1052	1792	2688	1681	4369	615	868	1483	1090	1187	2277	1742	1432	3174
BGIOSGA000046	107	277	384	10	4	14	67	53	120	46	39	85	31	25	56
BGIOSGA000047	2386	1481	3867	1665	883	2548	804	896	1700	1295	1489	2784	1161	1283	2444
BGIOSGA000048	202	215	417	227	166	393	113	159	272	171	155	326	174	200	374
BGIOSGA000049	9	5	14	21	16	37	164	108	272	305	354	659	470	322	792
BGIOSGA000050	10	12	22	4	8	12	7	5	12	10	1	11	2	1	3
BGIOSGA000051	627	886	1513	781	479	1260	624	774	1398	715	769	1484	1001	1001	2002
BGIOSGA000052	84	76	160	90	78	168	63	47	110	94	101	195	74	97	171
BGIOSGA000053	0	2	2	0	0	0	0	0	0	0	0	0	0	0	0
BGIOSGA000054	4576	5368	9944	5194	3999	9193	5974	7238	13212	5032	5781	10813	6460	5740	12200
BGIOSGA000055	294	328	622	475	404	879	367	382	749	356	380	736	367	375	742
BGIOSGA000056	15	10	25	8	6	14	11	10	21	4	5	9	1	2	3
BGIOSGA000057	8	1	9	3	2	5	3	4	7	1	3	4	2	2	4
BGIOSGA000058	586	876	1462	533	362	895	744	775	1519	464	464	928	465	510	975
BGIOSGA000059	0	0	0	0	0	0	0	0	0	0	0	0	0	0	0
BGIOSGA000060	2739	2455	5194	4115	2941	7056	2150	3003	5153	3399	3393	6792	3124	3160	6284
BGIOSGA000061	144	112	256	318	228	546	83	137	220	225	275	500	311	338	649
BGIOSGA000062	2582	1985	4567	2007	1670	3677	1315	1538	2853	2053	1778	3831	1940	1713	3653
BGIOSGA000063	777	1230	2007	1030	772	1802	1033	1107	2140	1307	1239	2546	1512	1256	2768
BGIOSGA000064	277	165	442	341	266	607	151	206	357	342	385	727	403	353	756
BGIOSGA000065	9	7	16	4	2	6	7	9	16	1	1	2	3	4	7
BGIOSGA000066	0	0	0	0	0	0	0	0	0	0	0	0	0	0	0
BGIOSGA000067	2	6	8	0	0	0	0	0	0	0	0	0	0	0	0
BGIOSGA000068	219	47	266	174	138	312	31	43	74	135	159	294	98	96	194
BGIOSGA000069	74	29	103	297	188	485	9	12	21	44	42	86	74	65	139
BGIOSGA000070	950	896	1846	886	665	1551	742	710	1452	1585	1364	2949	1043	860	1903
BGIOSGA000071	880	595	1475	1092	757	1849	461	474	935	687	840	1527	876	903	1779
BGIOSGA000072	0	0	0	0	0	0	0	0	0	0	0	0	0	0	0
BGIOSGA000073	0	0	0	0	0	0	0	0	0	0	2	2	0	1	1
BGIOSGA000074	268	181	449	293	191	484	95	104	199	247	253	500	226	302	528
BGIOSGA000075	558	513	1071	209	201	410	418	390	808	334	396	730	236	163	399
BGIOSGA000076	28	21	49	175	165	340	34	25	59	43	23	66	42	33	75
BGIOSGA000077	683	631	1314	691	429	1120	505	603	1108	473	516	989	520	506	1026
BGIOSGA000078	2	2	4	1	1	2	4	6	10	2	0	2	0	7	7
BGIOSGA000079	395	432	827	323	186	509	130	127	257	275	410	685	365	309	674
BGIOSGA000080	144	54	198	232	178	410	118	131	249	242	233	475	282	246	528
BGIOSGA000081	4	17	21	4	13	17	7	2	9	17	5	22	6	14	20
BGIOSGA000082	885	2576	3461	4905	4689	9594	1520	1721	3241	3179	3109	6288	2260	1956	4216
BGIOSGA000083	124	210	334	102	66	168	199	218	417	73	56	129	31	45	76
BGIOSGA000084	2	5	7	4	5	9	2	1	3	15	7	22	0	0	0
BGIOSGA000085	7	16	23	2	7	9	1	3	4	1	4	5	1	2	3
BGIOSGA000086	0	0	0	0	0	0	0	0	0	0	0	0	0	0	0
BGIOSGA000087	74	122	196	117	97	214	780	525	1305	261	197	458	180	181	361
BGIOSGA000088	793	677	1470	2500	2344	4844	1197	1283	2480	5711	5171	10882	5961	6289	12250
BGIOSGA000089	226	229	455	10	13	23	406	597	1003	123	113	236	7	0	7
BGIOSGA000090	566	462	1028	2024	1648	3672	568	733	1301	2062	1687	3749	1282	1403	2685
BGIOSGA000091	35	45	80	12	11	23	16	18	34	4	1	5	0	0	0
BGIOSGA000092	0	0	0	0	0	0	0	0	0	0	0	0	0	0	0
BGIOSGA000093	1026	741	1767	65	86	151	617	651	1268	101	140	241	70	68	138
BGIOSGA000094	94	50	144	59	59	118	52	52	104	52	34	86	35	30	65
BGIOSGA000095	0	8	8	0	2	2	166	164	330	129	124	253	161	157	318
BGIOSGA000096	8	0	8	7	5	12	3	6	9	2	1	3	2	3	5
BGIOSGA000097	104	137	241	15	1	16	596	693	1289	45	152	197	843	704	1547
BGIOSGA000098	1447	1377	2824	1488	986	2474	1167	1442	2609	1299	1437	2736	1340	1284	2624
BGIOSGA000099	2	6	8	2	1	3	1	0	1	0	0	0	4	0	4
BGIOSGA000100	0	0	0	0	0	0	0	0	0	0	0	0	0	0	0
BGIOSGA000101	17	13	30	0	0	0	0	2	2	0	0	0	0	0	0
BGIOSGA000102	126	99	225	90	68	158	79	71	150	65	59	124	35	54	89
BGIOSGA000103	1522	1566	3088	2874	1983	4857	1147	1500	2647	1952	2206	4158	2649	2738	5387
BGIOSGA000104	90	165	255	100	57	157	102	80	182	62	67	129	68	60	128
BGIOSGA000105	244	237	481	825	498	1323	285	294	579	652	732	1384	781	670	1451
BGIOSGA000106	0	0	0	0	0	0	0	0	0	0	0	0	0	0	0
BGIOSGA000107	0	0	0	0	0	0	0	0	0	0	0	0	0	0	0
BGIOSGA000108	0	0	0	1	2	3	0	0	0	0	0	0	0	0	0
BGIOSGA000109	1197	1676	2873	936	1063	1999	2237	2472	4709	709	532	1241	985	881	1866
BGIOSGA000110	594	494	1088	488	404	892	365	546	911	453	528	981	660	651	1311
BGIOSGA000111	411	250	661	1006	699	1705	239	369	608	758	744	1502	885	852	1737
BGIOSGA000112	146	126	272	83	55	138	344	355	699	195	213	408	84	106	190
BGIOSGA000113	218	220	438	382	291	673	208	201	409	305	386	691	224	244	468
BGIOSGA000114	576	374	950	446	204	650	295	356	651	305	268	573	256	257	513
BGIOSGA000115	124	149	273	80	82	162	17	36	53	19	14	33	9	13	22
BGIOSGA000116	0	0	0	0	0	0	0	0	0	0	0	0	0	0	0
BGIOSGA000117	0	0	0	0	0	0	0	0	0	0	0	0	0	0	0
BGIOSGA000118	0	4	4	2	0	2	0	2	2	0	0	0	0	0	0
BGIOSGA000119	0	0	0	0	0	0	24	17	41	18	6	24	0	6	6
BGIOSGA000120	0	0	0	0	0	0	11	4	15	4	1	5	0	0	0
BGIOSGA000121	0	0	0	0	0	0	1	4	5	5	1	6	1	0	1
BGIOSGA000122	0	0	0	0	0	0	0	0	0	0	0	0	0	0	0
BGIOSGA000123	0	0	0	0	0	0	0	0	0	0	0	0	0	0	0
BGIOSGA000124	9	6	15	0	2	2	6	0	6	2	8	10	0	0	0
BGIOSGA000125	111	426	537	6	5	11	98	68	166	13	17	30	18	9	27
BGIOSGA000126	1111	679	1790	1677	1121	2798	816	894	1710	1370	1364	2734	1404	1220	2624
BGIOSGA000127	0	0	0	0	0	0	0	0	0	0	0	0	0	0	0
BGIOSGA000128	22	4	26	0	4	4	4	10	14	13	5	18	16	8	24
BGIOSGA000129	10	0	10	0	0	0	13	5	18	0	2	2	0	2	2
BGIOSGA000130	250	163	413	808	515	1323	114	189	303	434	490	924	554	534	1088
BGIOSGA000131	5	0	5	4	11	15	10	8	18	8	13	21	4	13	17
BGIOSGA000132	6	10	16	6	11	17	2	0	2	2	4	6	0	2	2
BGIOSGA000133	444	657	1101	26	57	83	69	62	131	17	15	32	4	0	4
BGIOSGA000134	2	8	10	1	3	4	0	0	0	0	0	0	0	0	0
BGIOSGA000135	358	486	844	1468	1209	2677	1258	1340	2598	2140	643	2783	1440	1646	3086
BGIOSGA000136	60	73	133	43	28	71	2	5	7	5	4	9	4	2	6
BGIOSGA000137	2	3	5	5	3	8	0	0	0	0	0	0	0	0	0
BGIOSGA000138	2	0	2	0	0	0	0	0	0	0	0	0	0	0	0
BGIOSGA000139	0	0	0	0	0	0	0	0	0	0	0	0	0	0	0
BGIOSGA000140	423	557	980	565	363	928	491	469	960	360	330	690	236	225	461
BGIOSGA000141	0	0	0	0	0	0	0	0	0	0	0	0	0	0	0
BGIOSGA000142	682	1308	1990	1664	1134	2798	1318	1530	2848	1742	1846	3588	2219	2004	4223
BGIOSGA000143	0	0	0	0	0	0	0	0	0	0	0	0	0	0	0
BGIOSGA000144	351	341	692	316	230	546	282	278	560	271	248	519	273	315	588
BGIOSGA000145	31	19	50	65	30	95	3	11	14	31	29	60	29	30	59
BGIOSGA000146	131	108	239	98	63	161	51	96	147	57	96	153	135	104	239
BGIOSGA000147	2589	2214	4803	1526	1202	2728	2977	3398	6375	1788	2158	3946	1938	1747	3685
BGIOSGA000148	119	225	344	58	61	119	117	132	249	82	105	187	40	33	73
BGIOSGA000149	0	0	0	0	0	0	0	0	0	0	0	0	0	0	0
BGIOSGA000150	260	100	360	217	168	385	46	72	118	128	159	287	89	133	222
BGIOSGA000151	24	4	28	11	6	17	5	5	10	7	13	20	7	17	24
BGIOSGA000152	326	147	473	170	161	331	138	142	280	119	152	271	152	158	310
BGIOSGA000153	351	1087	1438	1131	939	2070	378	501	879	812	644	1456	762	649	1411
BGIOSGA000154	562	1455	2017	4770	5167	9937	1863	2104	3967	10448	8141	18589	5067	5431	10498
BGIOSGA000155	55	16	71	107	57	164	11	17	28	35	39	74	38	21	59
BGIOSGA000156	14	5	19	90	33	123	2	2	4	25	17	42	62	55	117
BGIOSGA000157	4	11	15	3	1	4	0	5	5	57	27	84	26	15	41
BGIOSGA000158	8	2	10	52	26	78	0	13	13	13	8	21	85	91	176
BGIOSGA000159	20	6	26	27	16	43	8	10	18	9	20	29	40	44	84
BGIOSGA000160	187	112	299	331	213	544	142	138	280	241	252	493	142	157	299
BGIOSGA000161	1370	1504	2874	1792	1313	3105	1309	1251	2560	1439	1554	2993	1020	918	1938
BGIOSGA000162	8	9	17	0	1	1	3	6	9	1	3	4	1	0	1
BGIOSGA000163	0	0	0	0	0	0	0	1	1	1	0	1	0	0	0
BGIOSGA000164	555	770	1325	401	325	726	554	657	1211	383	386	769	467	414	881
BGIOSGA000165	4736	4748	9484	3861	3158	7019	4095	4360	8455	4067	4186	8253	3528	3380	6908
BGIOSGA000166	330	313	643	633	457	1090	451	458	909	492	612	1104	307	303	610
BGIOSGA000167	332	327	659	9	29	38	176	256	432	47	54	101	59	42	101
BGIOSGA000168	347	474	821	138	148	286	564	684	1248	218	316	534	230	182	412
BGIOSGA000169	12	15	27	6	5	11	4	7	11	0	1	1	0	2	2
BGIOSGA000170	0	0	0	0	0	0	0	0	0	0	0	0	0	0	0
BGIOSGA000171	30	17	47	5	2	7	19	27	46	12	8	20	6	13	19
BGIOSGA000172	230	153	383	51	28	79	219	205	424	14	17	31	23	23	46
BGIOSGA000173	509	337	846	359	217	576	232	297	529	118	178	296	235	255	490
BGIOSGA000174	419	277	696	474	339	813	174	251	425	245	273	518	391	345	736
BGIOSGA000175	134	82	216	163	95	258	42	52	94	96	130	226	114	113	227
BGIOSGA000176	2364	5321	7685	5238	5496	10734	6082	5906	11988	5341	3710	9051	4481	5332	9813
BGIOSGA000177	1034	1327	2361	1382	1108	2490	1142	1176	2318	1528	1366	2894	1185	1161	2346
BGIOSGA000178	1099	2121	3220	1081	1241	2322	913	996	1909	1345	1592	2937	921	739	1660
BGIOSGA000179	667	905	1572	404	407	811	508	613	1121	377	509	886	561	513	1074
BGIOSGA000180	334	588	922	208	231	439	276	227	503	156	157	313	144	159	303
BGIOSGA000181	504	391	895	272	182	454	386	494	880	615	592	1207	299	343	642
BGIOSGA000182	18	38	56	91	51	142	33	53	86	49	36	85	95	72	167
BGIOSGA000183	46	54	100	378	245	623	91	104	195	263	221	484	243	239	482
BGIOSGA000184	0	4	4	0	7	7	0	1	1	1	3	4	0	0	0
BGIOSGA000185	766	661	1427	1551	1031	2582	460	578	1038	1007	1092	2099	1255	1049	2304
BGIOSGA000186	25	7	32	58	22	80	5	8	13	19	36	55	31	57	88
BGIOSGA000187	353	307	660	833	479	1312	209	173	382	330	334	664	534	589	1123
BGIOSGA000188	0	0	0	1	0	1	0	0	0	2	7	9	0	0	0
BGIOSGA000189	0	0	0	0	0	0	0	0	0	0	0	0	0	0	0
BGIOSGA000190	37	28	65	4	4	8	130	154	284	19	30	49	46	30	76
BGIOSGA000191	211	154	365	135	104	239	156	180	336	86	105	191	101	99	200
BGIOSGA000192	749	814	1563	1012	660	1672	618	841	1459	622	953	1575	920	818	1738
BGIOSGA000193	743	617	1360	893	442	1335	372	443	815	553	567	1120	214	255	469
BGIOSGA000194	819	807	1626	244	205	449	418	506	924	179	406	585	276	225	501
BGIOSGA000195	5	10	15	3	1	4	128	103	231	47	66	113	86	51	137
BGIOSGA000196	28	101	129	31	24	55	90	145	235	64	32	96	64	68	132
BGIOSGA000197	0	2	2	2	2	4	2	1	3	1	0	1	0	1	1
BGIOSGA000198	191	323	514	202	144	346	207	211	418	188	193	381	202	191	393
BGIOSGA000199	893	1297	2190	641	717	1358	1764	1628	3392	1040	1214	2254	867	641	1508
BGIOSGA000200	1746	2246	3992	2938	2163	5101	1857	2131	3988	2492	3225	5717	3143	2591	5734
BGIOSGA000201	24	21	45	655	361	1016	77	55	132	355	397	752	420	395	815
BGIOSGA000202	11	22	33	132	165	297	4	2	6	27	12	39	17	7	24
BGIOSGA000203	4	1	5	2	2	4	3	0	3	0	0	0	1	2	3
BGIOSGA000204	0	0	0	0	0	0	3	1	4	12	8	20	16	12	28
BGIOSGA000205	1680	2585	4265	2845	1633	4478	2533	2788	5321	2756	3361	6117	3080	3006	6086
BGIOSGA000206	548	699	1247	381	339	720	407	471	878	226	149	375	125	169	294
BGIOSGA000207	1080	1113	2193	1016	758	1774	866	964	1830	867	921	1788	1225	1078	2303
BGIOSGA000208	114	98	212	102	74	176	47	93	140	73	97	170	98	117	215
BGIOSGA000209	84	143	227	140	74	214	86	96	182	153	175	328	186	181	367
BGIOSGA000210	0	0	0	0	0	0	0	0	0	0	1	1	0	0	0
BGIOSGA000211	0	0	0	0	0	0	0	0	0	0	1	1	0	0	0
BGIOSGA000212	3358	1213	4571	1378	1322	2700	2702	2700	5402	1260	1747	3007	655	703	1358
BGIOSGA000213	2816	2735	5551	1719	1681	3400	2483	2534	5017	1513	1982	3495	1280	1069	2349
BGIOSGA000214	1007	1254	2261	1683	1608	3291	1434	1704	3138	1324	1781	3105	1695	1516	3211
BGIOSGA000215	8432	6066	14498	8678	6807	15485	4181	4928	9109	4760	5661	10421	4250	3655	7905
BGIOSGA000216	42	31	73	52	70	122	32	37	69	43	64	107	51	69	120
BGIOSGA000217	133	65	198	182	148	330	51	73	124	85	107	192	92	76	168
BGIOSGA000218	1536	1710	3246	1492	1083	2575	1297	1561	2858	1121	1163	2284	1247	1019	2266
BGIOSGA000219	338	139	477	304	194	498	128	116	244	203	185	388	120	102	222
BGIOSGA000220	1979	2280	4259	1315	983	2298	3064	2998	6062	1446	1993	3439	1490	1217	2707
BGIOSGA000221	448	663	1111	928	535	1463	711	922	1633	824	948	1772	735	744	1479
BGIOSGA000222	373	419	792	386	250	636	354	397	751	387	474	861	444	376	820
BGIOSGA000223	9	52	61	4	4	8	18	6	24	5	8	13	8	0	8
BGIOSGA000224	685	594	1279	1550	1034	2584	1697	2046	3743	2167	2200	4367	2708	2351	5059
BGIOSGA000225	2696	2344	5040	4154	2569	6723	1876	2266	4142	3951	4740	8691	3744	3848	7592
BGIOSGA000226	949	459	1408	2544	1620	4164	467	661	1128	1540	1753	3293	1640	1513	3153
BGIOSGA000227	973	861	1834	2497	1684	4181	801	937	1738	2363	2292	4655	1536	1787	3323
BGIOSGA000228	2407	1879	4286	1122	762	1884	1730	1930	3660	1272	1518	2790	1173	1082	2255
BGIOSGA000229	6	3	9	4	0	4	5	5	10	7	4	11	3	2	5
BGIOSGA000230	737	650	1387	576	403	979	759	918	1677	396	461	857	572	475	1047
BGIOSGA000231	468	606	1074	481	317	798	735	958	1693	436	416	852	468	379	847
BGIOSGA000232	9	7	16	0	3	3	7	9	16	4	4	8	3	9	12
BGIOSGA000233	2578	1961	4539	3754	2523	6277	1792	2297	4089	3344	3617	6961	2861	2688	5549
BGIOSGA000234	4	5	9	0	0	0	0	0	0	0	0	0	0	0	0
BGIOSGA000235	660	601	1261	562	377	939	951	982	1933	486	565	1051	574	508	1082
BGIOSGA000236	605	362	967	426	344	770	522	595	1117	401	495	896	380	392	772
BGIOSGA000237	2095	1850	3945	560	436	996	1298	1476	2774	616	734	1350	488	431	919
BGIOSGA000238	21	22	43	0	2	2	1	11	12	2	0	2	4	0	4
BGIOSGA000239	546	34	580	1342	794	2136	28	45	73	678	832	1510	635	659	1294
BGIOSGA000240	5	0	5	0	0	0	0	0	0	2	0	2	0	0	0
BGIOSGA000241	0	0	0	0	0	0	0	0	0	0	0	0	0	0	0
BGIOSGA000242	525	688	1213	590	466	1056	475	529	1004	516	590	1106	616	606	1222
BGIOSGA000243	9102	10778	19880	8910	7123	16033	7253	7748	15001	10446	8188	18634	7243	7303	14546
BGIOSGA000244	188	148	336	51	40	91	101	93	194	44	31	75	22	24	46
BGIOSGA000245	828	521	1349	588	416	1004	447	537	984	512	547	1059	577	567	1144
BGIOSGA000246	1	0	1	0	0	0	0	0	0	0	0	0	0	0	0
BGIOSGA000247	56	91	147	2	4	6	20	28	48	5	3	8	0	0	0
BGIOSGA000248	145	274	419	140	95	235	179	185	364	139	174	313	123	116	239
BGIOSGA000249	852	978	1830	731	643	1374	878	893	1771	653	964	1617	1041	920	1961
BGIOSGA000250	0	0	0	0	0	0	0	0	0	0	0	0	0	0	0
BGIOSGA000251	294	192	486	326	241	567	165	209	374	213	247	460	217	206	423
BGIOSGA000252	71	75	146	61	67	128	58	46	104	25	57	82	31	15	46
BGIOSGA000253	10	7	17	68	23	91	7	10	17	10	14	24	44	21	65
BGIOSGA000254	1	0	1	43	19	62	0	3	3	0	6	6	16	4	20
BGIOSGA000255	2438	1696	4134	4659	2985	7644	1133	1395	2528	4312	4775	9087	3712	3703	7415
BGIOSGA000256	511	685	1196	829	555	1384	490	631	1121	745	723	1468	896	963	1859
BGIOSGA000257	2309	2122	4431	2832	2167	4999	1576	1973	3549	2572	3107	5679	2598	2498	5096
BGIOSGA000258	42	131	173	9	2	11	51	89	140	33	41	74	0	3	3
BGIOSGA000259	42	194	236	9	4	13	91	105	196	64	92	156	34	20	54
BGIOSGA000260	53	275	328	185	52	237	38	45	83	78	78	156	69	40	109
BGIOSGA000261	2713	2301	5014	3345	2387	5732	2629	3223	5852	2883	3122	6005	3013	2520	5533
BGIOSGA000262	2411	2651	5062	4768	3807	8575	2704	3066	5770	3568	4008	7576	3668	3094	6762
BGIOSGA000263	1134	1570	2704	1940	1428	3368	1030	1139	2169	1789	1834	3623	1310	1734	3044
BGIOSGA000264	581	1817	2398	1432	1000	2432	938	1160	2098	787	448	1235	1085	1125	2210
BGIOSGA000265	45	3	48	34	27	61	24	21	45	50	68	118	100	70	170
BGIOSGA000266	0	0	0	0	0	0	0	0	0	0	0	0	0	0	0
BGIOSGA000267	18	18	36	23	12	35	3	13	16	15	23	38	18	26	44
BGIOSGA000268	97	174	271	185	77	262	180	221	401	131	166	297	181	108	289
BGIOSGA000269	11	7	18	17	14	31	5	8	13	22	16	38	19	29	48
BGIOSGA000270	40	51	91	2	0	2	17	35	52	0	2	2	1	2	3
BGIOSGA000271	130	133	263	361	231	592	90	147	237	269	262	531	235	249	484
BGIOSGA000272	318	807	1125	476	350	826	933	913	1846	412	504	916	383	335	718
BGIOSGA000273	38	16	54	30	17	47	21	35	56	30	23	53	20	50	70
BGIOSGA000274	0	0	0	0	0	0	0	0	0	0	0	0	2	0	2
BGIOSGA000275	541	364	905	951	646	1597	217	286	503	732	711	1443	642	648	1290
BGIOSGA000276	459	365	824	4795	2899	7694	1050	1227	2277	5257	4100	9357	5222	5497	10719
BGIOSGA000277	788	433	1221	947	1202	2149	447	567	1014	766	743	1509	815	836	1651
BGIOSGA000278	7	3	10	10	2	12	13	9	22	13	4	17	15	10	25
BGIOSGA000279	4529	3973	8502	10997	6869	17866	3555	4112	7667	9795	9920	19715	9749	10702	20451
BGIOSGA000280	330	184	514	1102	675	1777	128	225	353	823	834	1657	913	884	1797
BGIOSGA000281	3557	4382	7939	210	187	397	953	1126	2079	141	143	284	165	209	374
BGIOSGA000282	23	10	33	0	0	0	52	47	99	0	0	0	0	3	3
BGIOSGA000283	6391	3920	10311	8541	5427	13968	2213	2726	4939	4948	5166	10114	2703	2690	5393
BGIOSGA000284	0	0	0	0	2	2	0	0	0	0	2	2	2	0	2
BGIOSGA000285	1317	1142	2459	1877	1304	3181	1113	1357	2470	1636	1711	3347	1849	1526	3375
BGIOSGA000286	186	353	539	99	93	192	451	463	914	90	199	289	197	142	339
BGIOSGA000287	2084	971	3055	1841	1278	3119	817	992	1809	1631	1974	3605	1330	1351	2681
BGIOSGA000288	15	24	39	16	15	31	12	21	33	18	12	30	8	15	23
BGIOSGA000289	5	0	5	0	5	5	1	2	3	0	1	1	1	3	4
BGIOSGA000290	1934	1644	3578	2737	2514	5251	1865	2147	4012	3754	3529	7283	2184	2230	4414
BGIOSGA000291	998	1125	2123	1074	639	1713	855	813	1668	923	897	1820	853	774	1627
BGIOSGA000292	1514	1145	2659	1339	823	2162	1217	1359	2576	1256	1328	2584	771	780	1551
BGIOSGA000293	647	603	1250	379	297	676	442	447	889	325	334	659	465	413	878
BGIOSGA000294	1008	797	1805	1774	1532	3306	652	794	1446	1668	1708	3376	1652	1570	3222
BGIOSGA000295	98	162	260	52	45	97	106	152	258	32	45	77	46	54	100
BGIOSGA000296	0	0	0	0	0	0	0	0	0	0	0	0	0	0	0
BGIOSGA000297	0	0	0	1	0	1	0	0	0	0	0	0	0	0	0
BGIOSGA000298	2436	2252	4688	2528	2013	4541	1801	2080	3881	2220	2718	4938	2822	2383	5205
BGIOSGA000299	1408	2323	3731	1588	1312	2900	2078	2544	4622	1511	2066	3577	1568	1247	2815
BGIOSGA000300	0	0	0	8	0	8	0	1	1	2	4	6	6	2	8
BGIOSGA000301	45330	121025	166355	176675	161574	338249	94750	104099	198849	181920	187761	369681	159699	162065	321764
BGIOSGA000302	10	4	14	0	0	0	0	4	4	10	5	15	4	2	6
BGIOSGA000303	31	75	106	22	12	34	33	18	51	21	25	46	21	19	40
BGIOSGA000304	247	351	598	231	141	372	147	181	328	271	298	569	178	225	403
BGIOSGA000305	417	485	902	508	381	889	414	471	885	622	735	1357	746	649	1395
BGIOSGA000306	1082	901	1983	1217	453	1670	398	623	1021	922	914	1836	787	804	1591
BGIOSGA000307	553	202	755	470	257	727	248	319	567	249	322	571	268	243	511
BGIOSGA000308	0	0	0	0	0	0	0	0	0	0	0	0	0	0	0
BGIOSGA000309	634	860	1494	1079	1022	2101	1275	1314	2589	1032	965	1997	1079	1025	2104
BGIOSGA000310	354	483	837	793	457	1250	200	326	526	488	692	1180	1039	1109	2148
BGIOSGA000311	797	660	1457	573	275	848	396	510	906	570	724	1294	1283	1112	2395
BGIOSGA000312	756	612	1368	962	605	1567	829	985	1814	701	789	1490	755	655	1410
BGIOSGA000313	348	264	612	709	407	1116	311	423	734	547	547	1094	763	718	1481
BGIOSGA000314	1606	1504	3110	954	687	1641	1100	1243	2343	806	1185	1991	873	887	1760
BGIOSGA000315	379	429	808	75	50	125	145	156	301	72	66	138	120	78	198
BGIOSGA000316	32	14	46	96	49	145	10	32	42	36	61	97	189	119	308
BGIOSGA000317	215	161	376	161	91	252	262	283	545	113	193	306	54	62	116
BGIOSGA000318	1336	663	1999	1259	906	2165	444	522	966	844	894	1738	849	781	1630
BGIOSGA000319	189	420	609	136	49	185	108	91	199	76	66	142	55	45	100
BGIOSGA000320	485	391	876	705	540	1245	363	400	763	762	818	1580	623	471	1094
BGIOSGA000321	0	6	6	2	3	5	3	4	7	2	0	2	8	1	9
BGIOSGA000322	1809	1054	2863	1570	1293	2863	967	1009	1976	1490	1867	3357	1076	971	2047
BGIOSGA000323	2	0	2	2	2	4	1	0	1	0	0	0	2	0	2
BGIOSGA000324	14	13	27	14	5	19	6	19	25	8	9	17	13	27	40
BGIOSGA000325	3229	3139	6368	5616	3711	9327	2538	2707	5245	5659	6070	11729	4597	4694	9291
BGIOSGA000326	1816	1778	3594	3967	2927	6894	2821	3036	5857	3071	3449	6520	2693	2488	5181
BGIOSGA000327	297	249	546	168	123	291	178	251	429	149	140	289	177	167	344
BGIOSGA000328	1097	798	1895	1316	974	2290	773	854	1627	966	1079	2045	846	775	1621
BGIOSGA000329	993	855	1848	1440	817	2257	863	1088	1951	1735	1914	3649	1673	1581	3254
BGIOSGA000330	4	2	6	0	5	5	4	5	9	2	2	4	4	7	11
BGIOSGA000331	256	259	515	189	119	308	158	168	326	208	283	491	386	294	680
BGIOSGA000332	1173	1607	2780	1358	647	2005	880	984	1864	1118	1113	2231	288	410	698
BGIOSGA000333	6534	5428	11962	9072	4829	13901	4804	5236	10040	7403	7804	15207	8149	6619	14768
BGIOSGA000334	947	1053	2000	1115	806	1921	784	797	1581	986	1003	1989	961	820	1781
BGIOSGA000335	0	0	0	17	6	23	2	2	4	3	1	4	4	1	5
BGIOSGA000336	0	0	0	0	0	0	0	1	1	0	0	0	0	0	0
BGIOSGA000337	353	676	1029	83	50	133	65	78	143	75	60	135	43	30	73
BGIOSGA000338	692	622	1314	688	401	1089	422	407	829	564	584	1148	404	345	749
BGIOSGA000339	1339	1876	3215	5260	5670	10930	2272	3715	5987	4255	4368	8623	7993	7678	15671
BGIOSGA000340	0	0	0	1	0	1	0	0	0	4	5	9	2	0	2
BGIOSGA000341	0	0	0	0	0	0	0	0	0	0	0	0	0	0	0
BGIOSGA000342	2	30	32	17	6	23	11	14	25	13	9	22	4	17	21
BGIOSGA000343	112	36	148	13	3	16	0	0	0	0	0	0	0	0	0
BGIOSGA000344	48	35	83	38	28	66	130	82	212	629	485	1114	20	31	51
BGIOSGA000345	1512	1231	2743	569	524	1093	331	377	708	664	660	1324	327	450	777
BGIOSGA000346	21	23	44	75	50	125	101	101	202	171	285	456	239	135	374
BGIOSGA000347	54	18	72	5	2	7	10	9	19	8	6	14	4	1	5
BGIOSGA000348	10	3	13	1	2	3	16	28	44	8	11	19	2	15	17
BGIOSGA000349	4	1	5	8	1	9	0	0	0	0	0	0	0	0	0
BGIOSGA000350	4	6	10	6	3	9	10	3	13	5	6	11	4	5	9
BGIOSGA000351	22	11	33	93	67	160	43	70	113	151	179	330	217	181	398
BGIOSGA000352	234	237	471	16	18	34	105	72	177	28	34	62	0	5	5
BGIOSGA000353	163	184	347	71	46	117	68	46	114	85	151	236	78	53	131
BGIOSGA000354	746	1152	1898	1057	631	1688	877	1120	1997	946	1114	2060	1250	1330	2580
BGIOSGA000355	0	0	0	0	0	0	0	0	0	0	0	0	0	0	0
BGIOSGA000356	80	828	908	146	64	210	365	335	700	210	143	353	199	209	408
BGIOSGA000357	25	27	52	15	5	20	21	35	56	19	7	26	8	11	19
BGIOSGA000358	720	680	1400	1794	1057	2851	688	781	1469	1433	1532	2965	2250	1982	4232
BGIOSGA000359	2018	822	2840	3530	2358	5888	647	747	1394	3188	3608	6796	2049	2188	4237
BGIOSGA000360	0	0	0	0	0	0	0	0	0	0	0	0	0	0	0
BGIOSGA000361	1381	3283	4664	1677	873	2550	2838	2814	5652	1573	1721	3294	1875	1644	3519
BGIOSGA000362	184	146	330	232	183	415	89	115	204	188	179	367	254	252	506
BGIOSGA000363	850	494	1344	869	578	1447	664	687	1351	730	834	1564	665	678	1343
BGIOSGA000364	243	198	441	210	131	341	156	173	329	161	133	294	174	167	341
BGIOSGA000365	0	0	0	0	0	0	0	0	0	0	0	0	0	0	0
BGIOSGA000366	515	623	1138	469	299	768	426	535	961	385	411	796	330	333	663
BGIOSGA000367	8	0	8	5	4	9	0	0	0	0	0	0	0	0	0
BGIOSGA000368	211	167	378	463	327	790	145	205	350	365	506	871	568	515	1083
BGIOSGA000369	2988	5693	8681	1769	1467	3236	4005	3849	7854	1828	2950	4778	1691	1134	2825
BGIOSGA000370	2064	5328	7392	3006	2698	5704	3708	4021	7729	3643	3996	7639	3860	3818	7678
BGIOSGA000371	599	692	1291	394	248	642	459	465	924	342	367	709	354	306	660
BGIOSGA000372	185	892	1077	278	185	463	512	560	1072	274	233	507	421	393	814
BGIOSGA000373	807	966	1773	555	328	883	785	854	1639	633	702	1335	759	652	1411
BGIOSGA000374	1316	1803	3119	5202	3834	9036	2008	2192	4200	4596	4520	9116	4445	4472	8917
BGIOSGA000375	4744	2605	7349	9493	6293	15786	3320	4056	7376	8185	10513	18698	9658	9475	19133
BGIOSGA000376	3	1	4	1	0	1	6	4	10	11	6	17	7	7	14
BGIOSGA000377	523	241	764	529	369	898	107	107	214	214	187	401	114	118	232
BGIOSGA000378	720	415	1135	33	76	109	122	147	269	118	121	239	6	5	11
BGIOSGA000379	45	106	151	6	10	16	2	2	4	10	12	22	1	5	6
BGIOSGA000380	71	41	112	42	16	58	42	66	108	37	30	67	51	33	84
BGIOSGA000381	231	203	434	328	261	589	149	177	326	256	220	476	389	380	769
BGIOSGA000382	2690	5899	8589	3568	2487	6055	4337	5329	9666	5398	4243	9641	9148	9646	18794
BGIOSGA000383	1278	2859	4137	1692	1299	2991	2042	1925	3967	2675	2557	5232	1416	1532	2948
BGIOSGA000384	3	2	5	0	6	6	2	0	2	52	8	60	2	14	16
BGIOSGA000385	10	0	10	0	8	8	4	1	5	4	4	8	6	9	15
BGIOSGA000386	26	18	44	56	21	77	12	23	35	30	28	58	21	31	52
BGIOSGA000387	0	0	0	0	0	0	1	1	2	0	1	1	4	2	6
BGIOSGA000388	0	0	0	0	0	0	1	1	2	0	0	0	0	0	0
BGIOSGA000389	250	174	424	225	120	345	255	349	604	201	228	429	209	163	372
BGIOSGA000390	3090	5887	8977	2921	2631	5552	6680	7577	14257	2765	3052	5817	1936	1863	3799
BGIOSGA000391	317	294	611	530	394	924	186	200	386	379	364	743	433	410	843
BGIOSGA000392	608	3510	4118	118	111	229	1801	1488	3289	238	266	504	7	4	11
BGIOSGA000393	1039	1479	2518	501	307	808	2226	2239	4465	874	874	1748	501	330	831
BGIOSGA000394	238	686	924	119	129	248	261	260	521	282	274	556	310	236	546
BGIOSGA000395	867	1285	2152	622	546	1168	174	142	316	1169	1051	2220	618	808	1426
BGIOSGA000396	127	93	220	129	84	213	80	112	192	80	28	108	112	92	204
BGIOSGA000397	46	87	133	292	209	501	88	53	141	224	135	359	207	188	395
BGIOSGA000398	176	61	237	173	109	282	94	108	202	107	94	201	125	144	269
BGIOSGA000399	1681	1493	3174	2830	2702	5532	2187	2486	4673	2556	2583	5139	2898	2380	5278
BGIOSGA000400	103	147	250	153	120	273	258	265	523	158	62	220	110	156	266
BGIOSGA000401	48	48	96	19	18	37	34	36	70	27	26	53	15	11	26
BGIOSGA000402	992	846	1838	975	758	1733	817	925	1742	817	903	1720	840	771	1611
BGIOSGA000403	131	88	219	67	73	140	65	115	180	31	29	60	12	31	43
BGIOSGA000404	534	461	995	204	157	361	206	154	360	214	269	483	186	159	345
BGIOSGA000405	219	145	364	172	97	269	116	152	268	123	148	271	162	138	300
BGIOSGA000406	1166	1291	2457	1482	1016	2498	899	1076	1975	1482	1729	3211	1872	1694	3566
BGIOSGA000407	649	1556	2205	1079	696	1775	895	1060	1955	987	1045	2032	1126	1175	2301
BGIOSGA000408	0	0	0	0	0	0	0	0	0	0	0	0	0	0	0
BGIOSGA000409	0	0	0	0	0	0	0	0	0	0	0	0	0	0	0
BGIOSGA000410	1544	770	2314	2684	2066	4750	277	317	594	1178	982	2160	508	634	1142
BGIOSGA000411	0	0	0	0	0	0	0	0	0	2	0	2	0	2	2
BGIOSGA000412	1536	1156	2692	1715	1493	3208	932	1196	2128	1179	1269	2448	1530	1442	2972
BGIOSGA000413	2413	1400	3813	4442	3203	7645	920	1056	1976	4093	4122	8215	2994	3351	6345
BGIOSGA000414	0	0	0	0	1	1	0	0	0	0	0	0	0	0	0
BGIOSGA000415	0	0	0	1	0	1	0	0	0	0	0	0	0	0	0
BGIOSGA000416	225	326	551	240	181	421	415	412	827	243	256	499	238	214	452
BGIOSGA000417	0	0	0	0	0	0	0	0	0	0	0	0	0	0	0
BGIOSGA000418	0	2	2	0	0	0	0	0	0	0	1	1	1	1	2
BGIOSGA000419	0	0	0	0	0	0	2	0	2	0	0	0	0	0	0
BGIOSGA000420	605	439	1044	1497	800	2297	271	387	658	1175	1102	2277	1012	926	1938
BGIOSGA000421	395	393	788	397	280	677	250	265	515	305	367	672	268	287	555
BGIOSGA000422	13	19	32	108	75	183	50	113	163	110	113	223	46	42	88
BGIOSGA000423	479	187	666	482	229	711	137	167	304	321	482	803	242	310	552
BGIOSGA000424	12	5	17	6	7	13	4	2	6	2	1	3	9	9	18
BGIOSGA000425	861	1234	2095	820	668	1488	733	761	1494	648	649	1297	1003	986	1989
BGIOSGA000426	1065	404	1469	1554	765	2319	230	261	491	769	984	1753	497	694	1191
BGIOSGA000427	666	443	1109	685	599	1284	419	539	958	639	758	1397	639	505	1144
BGIOSGA000428	330	425	755	1218	1147	2365	423	420	843	1888	1289	3177	1584	1907	3491
BGIOSGA000429	1443	1637	3080	2307	2073	4380	1602	1644	3246	3076	2961	6037	2688	2328	5016
BGIOSGA000430	282	1213	1495	586	271	857	1426	1612	3038	614	545	1159	550	554	1104
BGIOSGA000431	439	242	681	732	418	1150	341	391	732	482	471	953	518	482	1000
BGIOSGA000432	917	740	1657	274	209	483	490	556	1046	267	288	555	296	238	534
BGIOSGA000433	3	1	4	14	3	17	4	0	4	16	12	28	7	8	15
BGIOSGA000434	22	23	45	1	7	8	18	9	27	6	5	11	3	2	5
BGIOSGA000435	4	16	20	61	43	104	48	48	96	120	98	218	93	137	230
BGIOSGA000436	70	52	122	28	56	84	48	54	102	50	57	107	36	28	64
BGIOSGA000437	60	59	119	5	3	8	41	47	88	2	2	4	0	2	2
BGIOSGA000438	5569	4829	10398	1919	1668	3587	4609	5182	9791	2652	2897	5549	2055	2603	4658
BGIOSGA000439	2307	3620	5927	785	715	1500	2793	2622	5415	1166	1521	2687	1064	757	1821
BGIOSGA000440	50	23	73	92	70	162	49	52	101	44	32	76	23	25	48
BGIOSGA000441	8	14	22	131	89	220	131	80	211	230	73	303	100	85	185
BGIOSGA000442	168	195	363	734	557	1291	98	185	283	417	453	870	595	609	1204
BGIOSGA000443	497	390	887	366	296	662	420	418	838	433	377	810	344	350	694
BGIOSGA000444	420	376	796	527	312	839	265	382	647	424	374	798	409	494	903
BGIOSGA000445	1503	1568	3071	2287	1693	3980	1409	1834	3243	2300	2555	4855	2160	1827	3987
BGIOSGA000446	491	308	799	224	162	386	283	311	594	142	145	287	114	101	215
BGIOSGA000447	311	330	641	283	209	492	247	271	518	183	192	375	125	135	260
BGIOSGA000448	222	126	348	334	284	618	89	168	257	211	207	418	264	250	514
BGIOSGA000449	180	167	347	170	66	236	272	331	603	81	100	181	121	126	247
BGIOSGA000450	694	795	1489	951	726	1677	728	710	1438	1243	1215	2458	886	825	1711
BGIOSGA000451	133	238	371	412	278	690	72	164	236	194	195	389	243	240	483
BGIOSGA000452	28	6	34	208	125	333	28	22	50	299	234	533	105	108	213
BGIOSGA000453	518	588	1106	560	419	979	459	517	976	476	539	1015	581	547	1128
BGIOSGA000454	0	0	0	0	0	0	0	0	0	0	0	0	0	0	0
BGIOSGA000455	1210	680	1890	394	377	771	873	900	1773	522	446	968	202	240	442
BGIOSGA000456	371	257	628	768	534	1302	104	183	287	469	579	1048	672	680	1352
BGIOSGA000457	1607	2230	3837	2921	2113	5034	2005	2218	4223	3249	3127	6376	3377	3197	6574
BGIOSGA000458	138	207	345	89	57	146	125	99	224	67	74	141	48	60	108
BGIOSGA000459	87	160	247	36	23	59	59	66	125	23	29	52	25	17	42
BGIOSGA000460	521	264	785	207	173	380	279	299	578	196	285	481	206	175	381
BGIOSGA000461	416	446	862	611	374	985	398	457	855	355	424	779	681	600	1281
BGIOSGA000462	46	65	111	3	10	13	30	45	75	2	6	8	8	2	10
BGIOSGA000463	819	287	1106	926	696	1622	319	357	676	734	826	1560	879	854	1733
BGIOSGA000464	89	79	168	128	121	249	46	69	115	124	113	237	111	116	227
BGIOSGA000465	646	563	1209	869	548	1417	520	665	1185	869	878	1747	934	890	1824
BGIOSGA000466	771	5692	6463	4247	4186	8433	5723	4983	10706	4115	4570	8685	3909	3610	7519
BGIOSGA000467	0	0	0	0	0	0	0	0	0	0	0	0	0	0	0
BGIOSGA000468	1968	3572	5540	1691	1723	3414	1538	1994	3532	1962	2535	4497	1510	1645	3155
BGIOSGA000469	9	6	15	114	72	186	8	9	17	56	74	130	32	18	50
BGIOSGA000470	0	0	0	0	0	0	0	0	0	0	0	0	0	0	0
BGIOSGA000471	0	1	1	0	0	0	0	0	0	0	0	0	1	0	1
BGIOSGA000472	296	621	917	366	293	659	364	424	788	220	357	577	281	179	460
BGIOSGA000473	7	1	8	6	4	10	16	11	27	6	1	7	7	16	23
BGIOSGA000474	418	496	914	505	390	895	438	488	926	599	562	1161	592	506	1098
BGIOSGA000475	857	1502	2359	1393	895	2288	1276	1398	2674	990	934	1924	1159	988	2147
BGIOSGA000476	670	717	1387	955	729	1684	727	963	1690	888	816	1704	496	704	1200
BGIOSGA000477	571	753	1324	458	337	795	511	543	1054	421	456	877	558	486	1044
BGIOSGA000478	11691	7859	19550	38434	25920	64354	6893	8380	15273	24108	24855	48963	18348	19098	37446
BGIOSGA000479	476	524	1000	679	570	1249	592	629	1221	704	749	1453	622	697	1319
BGIOSGA000480	148	208	356	331	264	595	115	152	267	182	157	339	177	167	344
BGIOSGA000481	346	257	603	369	220	589	150	206	356	411	344	755	213	237	450
BGIOSGA000482	2628	1862	4490	1691	1279	2970	1187	1320	2507	1809	2203	4012	1051	878	1929
BGIOSGA000483	0	0	0	0	0	0	0	0	0	0	0	0	0	0	0
BGIOSGA000484	0	0	0	0	0	0	0	0	0	0	0	0	0	0	0
BGIOSGA000485	113	179	292	237	175	412	170	187	357	156	155	311	146	146	292
BGIOSGA000486	187	171	358	381	350	731	226	235	461	513	377	890	302	303	605
BGIOSGA000487	9	22	31	78	111	189	34	37	71	247	158	405	249	407	656
BGIOSGA000488	136	189	325	166	55	221	74	116	190	215	130	345	96	111	207
BGIOSGA000489	67	12	79	1	0	1	5	4	9	0	0	0	0	1	1
BGIOSGA000490	126	141	267	202	173	375	202	204	406	209	247	456	226	191	417
BGIOSGA000491	9	3	12	3	6	9	20	25	45	4	2	6	10	5	15
BGIOSGA000492	1535	1598	3133	1483	1391	2874	1635	1587	3222	1190	1242	2432	1052	1052	2104
BGIOSGA000493	21	13	34	52	17	69	6	13	19	30	23	53	29	32	61
BGIOSGA000494	461	424	885	477	413	890	444	460	904	310	413	723	457	414	871
BGIOSGA000495	318	356	674	250	242	492	370	377	747	340	228	568	267	298	565
BGIOSGA000496	924	1018	1942	1147	1041	2188	689	743	1432	1060	1173	2233	1136	1238	2374
BGIOSGA000497	509	439	948	712	607	1319	575	592	1167	691	762	1453	737	690	1427
BGIOSGA000498	155	169	324	1014	677	1691	548	476	1024	630	540	1170	632	670	1302
BGIOSGA000499	12	24	36	3	13	16	6	3	9	5	2	7	2	5	7
BGIOSGA000500	1357	2274	3631	326	414	740	1163	1195	2358	513	535	1048	331	351	682
BGIOSGA000501	644	504	1148	638	572	1210	495	577	1072	561	607	1168	733	682	1415
BGIOSGA000502	34	64	98	27	16	43	324	335	659	87	107	194	111	88	199
BGIOSGA000503	0	0	0	0	0	0	0	0	0	0	1	1	0	0	0
BGIOSGA000504	17	4	21	7	3	10	7	9	16	7	4	11	2	0	2
BGIOSGA000505	0	0	0	1	0	1	1	0	1	2	0	2	0	0	0
BGIOSGA000506	11	17	28	12	4	16	21	26	47	9	10	19	6	2	8
BGIOSGA000507	215	39	254	68	66	134	145	157	302	88	95	183	96	108	204
BGIOSGA000508	587	437	1024	27	27	54	642	646	1288	133	138	271	18	4	22
BGIOSGA000509	101	44	145	15	9	24	15	17	32	26	28	54	20	17	37
BGIOSGA000510	66	86	152	208	111	319	90	125	215	107	103	210	148	149	297
BGIOSGA000511	924	392	1316	3026	1303	4329	706	751	1457	1645	1697	3342	2031	1894	3925
BGIOSGA000512	364	80	444	191	189	380	169	192	361	160	212	372	43	57	100
BGIOSGA000513	549	338	887	534	350	884	251	287	538	499	541	1040	575	610	1185
BGIOSGA000514	640	536	1176	1061	764	1825	367	441	808	901	903	1804	959	1057	2016
BGIOSGA000515	780	774	1554	856	1032	1888	1276	1659	2935	1241	1488	2729	1326	1178	2504
BGIOSGA000516	3	2	5	4	9	13	2	3	5	13	4	17	11	6	17
BGIOSGA000517	1776	1163	2939	3253	2113	5366	1451	1615	3066	2011	2456	4467	2057	1934	3991
BGIOSGA000518	3805	9121	12926	1686	1491	3177	2394	3031	5425	1662	1546	3208	1876	2134	4010
BGIOSGA000519	2377	2670	5047	2103	1923	4026	1921	1964	3885	4076	3777	7853	2479	2379	4858
BGIOSGA000520	4671	6408	11079	2091	1377	3468	4242	4630	8872	2236	2263	4499	1702	1804	3506
BGIOSGA000521	142	211	353	76	54	130	116	123	239	84	61	145	69	53	122
BGIOSGA000522	171	159	330	133	108	241	130	159	289	118	97	215	103	130	233
BGIOSGA000523	113	133	246	139	117	256	74	71	145	230	95	325	77	91	168
BGIOSGA000524	11	3	14	63	16	79	2	6	8	43	16	59	40	32	72
BGIOSGA000525	0	0	0	0	0	0	0	0	0	0	0	0	0	0	0
BGIOSGA000526	2178	1241	3419	2235	1873	4108	1127	1358	2485	2038	2304	4342	1852	1902	3754
BGIOSGA000527	509	350	859	504	399	903	341	335	676	865	859	1724	425	453	878
BGIOSGA000528	0	0	0	0	0	0	0	0	0	1	0	1	1	0	1
BGIOSGA000529	0	0	0	0	0	0	0	0	0	0	0	0	0	1	1
BGIOSGA000530	9	14	23	6	6	12	30	18	48	4	6	10	2	3	5
BGIOSGA000531	700	876	1576	465	428	893	1286	1352	2638	686	758	1444	603	554	1157
BGIOSGA000532	4840	3749	8589	4773	4056	8829	4044	4358	8402	4326	5210	9536	3562	3580	7142
BGIOSGA000533	2	0	2	2	9	11	10	16	26	1	0	1	2	6	8
BGIOSGA000534	279	295	574	471	332	803	270	328	598	334	462	796	536	495	1031
BGIOSGA000535	48	50	98	28	13	41	67	71	138	14	24	38	13	5	18
BGIOSGA000536	2303	4066	6369	7171	4746	11917	3440	4058	7498	6148	6122	12270	7045	6916	13961
BGIOSGA000537	2275	1890	4165	3240	2285	5525	1950	2447	4397	2934	3540	6474	4148	3996	8144
BGIOSGA000538	0	0	0	0	0	0	0	0	0	0	0	0	3	0	3
BGIOSGA000539	8431	8832	17263	13891	8336	22227	10021	12765	22786	10512	11577	22089	11558	10806	22364
BGIOSGA000540	322	311	633	531	340	871	358	411	769	593	548	1141	630	537	1167
BGIOSGA000541	0	0	0	0	0	0	0	0	0	0	0	0	0	0	0
BGIOSGA000542	780	1003	1783	890	675	1565	776	822	1598	769	795	1564	732	655	1387
BGIOSGA000543	3009	4637	7646	4928	3638	8566	3446	3814	7260	4310	4264	8574	2931	3181	6112
BGIOSGA000544	3041	3485	6526	5470	4110	9580	2333	2663	4996	4825	5001	9826	5637	5008	10645
BGIOSGA000545	11	0	11	2	13	15	2	0	2	2	1	3	4	2	6
BGIOSGA000546	279	160	439	1258	1085	2343	220	273	493	1373	1375	2748	850	826	1676
BGIOSGA000547	653	991	1644	693	572	1265	691	835	1526	596	715	1311	674	576	1250
BGIOSGA000548	1637	2191	3828	2209	1896	4105	1738	1995	3733	2194	2214	4408	1724	1667	3391
BGIOSGA000549	528	557	1085	569	443	1012	498	503	1001	429	485	914	513	508	1021
BGIOSGA000550	2	2	4	11	11	22	5	2	7	8	24	32	45	60	105
BGIOSGA000551	11	22	33	24	16	40	20	14	34	33	17	50	21	16	37
BGIOSGA000552	12	2	14	10	5	15	0	2	2	4	7	11	0	4	4
BGIOSGA000553	455	423	878	846	511	1357	634	636	1270	858	943	1801	272	229	501
BGIOSGA000554	942	1309	2251	1186	946	2132	1024	1107	2131	1171	1145	2316	957	1073	2030
BGIOSGA000555	762	954	1716	1304	766	2070	607	731	1338	1136	1266	2402	929	959	1888
BGIOSGA000556	14	3	17	43	34	77	7	14	21	23	17	40	24	28	52
BGIOSGA000557	31	64	95	10	10	20	15	17	32	14	5	19	7	14	21
BGIOSGA000558	1	0	1	0	0	0	2	1	3	2	2	4	0	2	2
BGIOSGA000559	0	0	0	0	0	0	0	0	0	0	0	0	1	0	1
BGIOSGA000560	200	401	601	241	354	595	118	202	320	319	382	701	885	589	1474
BGIOSGA000561	977	596	1573	696	696	1392	515	656	1171	559	637	1196	495	498	993
BGIOSGA000562	344	279	623	292	270	562	323	392	715	353	356	709	360	301	661
BGIOSGA000563	439	375	814	344	301	645	316	385	701	417	424	841	337	254	591
BGIOSGA000564	232	262	494	136	116	252	576	688	1264	130	166	296	296	229	525
BGIOSGA000565	0	0	0	0	0	0	1	0	1	0	0	0	0	0	0
BGIOSGA000566	646	699	1345	503	290	793	130	140	270	142	142	284	83	123	206
BGIOSGA000567	735	815	1550	879	764	1643	772	781	1553	960	954	1914	873	803	1676
BGIOSGA000568	2	5	7	17	5	22	0	0	0	0	2	2	0	0	0
BGIOSGA000569	467	194	661	109	130	239	137	161	298	195	396	591	54	86	140
BGIOSGA000570	0	0	0	0	0	0	0	0	0	0	0	0	0	0	0
BGIOSGA000571	1116	2887	4003	1848	1571	3419	2188	2347	4535	1481	1597	3078	1585	1481	3066
BGIOSGA000572	23	35	58	117	45	162	24	38	62	41	55	96	134	197	331
BGIOSGA000573	117	220	337	51	47	98	117	102	219	30	37	67	25	22	47
BGIOSGA000574	0	0	0	0	0	0	0	0	0	0	0	0	0	0	0
BGIOSGA000575	22	30	52	8	3	11	22	12	34	7	4	11	0	2	2
BGIOSGA000576	15096	10827	25923	3464	3986	7450	10360	12431	22791	3429	2263	5692	2486	3361	5847
BGIOSGA000577	13	35	48	11	4	15	5	15	20	5	4	9	0	10	10
BGIOSGA000578	0	0	0	0	0	0	4	3	7	3	2	5	1	2	3
BGIOSGA000579	971	1317	2288	893	610	1503	1269	1279	2548	904	1085	1989	877	742	1619
BGIOSGA000580	1511	1277	2788	1261	919	2180	1082	1258	2340	1181	1196	2377	590	789	1379
BGIOSGA000581	1604	1348	2952	3196	2259	5455	1217	1555	2772	2182	2278	4460	2373	2181	4554
BGIOSGA000582	1013	1035	2048	1112	803	1915	944	1117	2061	953	829	1782	993	1088	2081
BGIOSGA000583	17	28	45	43	62	105	53	50	103	157	72	229	13	20	33
BGIOSGA000584	0	0	0	0	0	0	0	0	0	0	0	0	0	0	0
BGIOSGA000585	3	2	5	25	13	38	1	0	1	12	4	16	7	9	16
BGIOSGA000586	0	0	0	0	0	0	0	11	11	23	22	45	24	15	39
BGIOSGA000587	4786	4810	9596	6079	4959	11038	4306	4993	9299	5207	6134	11341	5445	4907	10352
BGIOSGA000588	222	153	375	131	159	290	67	84	151	69	65	134	95	115	210
BGIOSGA000589	68	112	180	10	4	14	50	61	111	13	7	20	5	2	7
BGIOSGA000590	9	21	30	9	2	11	9	12	21	8	13	21	7	4	11
BGIOSGA000591	996	628	1624	385	311	696	518	505	1023	321	367	688	325	335	660
BGIOSGA000592	388	695	1083	471	280	751	532	569	1101	338	364	702	469	490	959
BGIOSGA000593	1683	2319	4002	1748	1376	3124	1632	1795	3427	1506	1538	3044	1938	1917	3855
BGIOSGA000594	201	166	367	151	140	291	96	67	163	111	76	187	49	77	126
BGIOSGA000595	207	148	355	334	291	625	248	254	502	332	340	672	327	337	664
BGIOSGA000596	0	10	10	2	3	5	8	14	22	6	2	8	4	1	5
BGIOSGA000597	6259	3742	10001	9011	5984	14995	2894	3566	6460	7383	9226	16609	6368	6439	12807
BGIOSGA000598	152	379	531	788	453	1241	379	408	787	363	334	697	129	164	293
BGIOSGA000599	8	3	11	19	12	31	2	2	4	15	13	28	8	10	18
BGIOSGA000600	62	35	97	52	57	109	18	22	40	63	76	139	50	58	108
BGIOSGA000601	124	516	640	106	92	198	195	233	428	145	148	293	260	196	456
BGIOSGA000602	149	341	490	286	153	439	177	191	368	266	110	376	249	328	577
BGIOSGA000603	4227	6290	10517	4834	3134	7968	4140	4713	8853	4060	4044	8104	1992	1984	3976
BGIOSGA000604	381	546	927	288	182	470	188	243	431	170	188	358	260	273	533
BGIOSGA000605	2345	3422	5767	2667	2458	5125	3196	3339	6535	4174	4583	8757	3166	3191	6357
BGIOSGA000606	75	37	112	32	24	56	49	66	115	41	17	58	46	26	72
BGIOSGA000607	256	1245	1501	737	525	1262	280	337	617	683	1329	2012	1119	593	1712
BGIOSGA000608	116	166	282	4	0	4	49	87	136	66	90	156	236	86	322
BGIOSGA000609	2	0	2	2	1	3	0	6	6	0	2	2	13	2	15
BGIOSGA000610	0	0	0	0	0	0	0	0	0	0	0	0	0	0	0
BGIOSGA000611	0	0	0	0	0	0	0	0	0	0	0	0	0	0	0
BGIOSGA000612	799	782	1581	1228	793	2021	682	817	1499	827	770	1597	996	933	1929
BGIOSGA000613	256	294	550	392	228	620	318	336	654	309	287	596	347	335	682
BGIOSGA000614	4149	2857	7006	3113	2560	5673	2346	2685	5031	2452	2336	4788	2048	2114	4162
BGIOSGA000615	213	86	299	739	542	1281	91	128	219	469	396	865	462	335	797
BGIOSGA000616	0	0	0	0	0	0	0	0	0	0	0	0	1	1	2
BGIOSGA000617	2	0	2	0	0	0	0	1	1	0	0	0	0	0	0
BGIOSGA000618	496	297	793	429	340	769	245	252	497	353	364	717	499	406	905
BGIOSGA000619	134	97	231	88	65	153	40	49	89	51	51	102	63	59	122
BGIOSGA000620	61	62	123	69	55	124	115	132	247	129	133	262	138	110	248
BGIOSGA000621	440	492	932	545	426	971	330	438	768	479	499	978	693	716	1409
BGIOSGA000622	344	130	474	150	107	257	38	53	91	85	66	151	94	95	189
BGIOSGA000623	445	415	860	1149	670	1819	335	471	806	751	768	1519	772	840	1612
BGIOSGA000624	527	313	840	2009	1157	3166	425	518	943	2640	2666	5306	2179	2355	4534
BGIOSGA000625	68	40	108	88	52	140	31	65	96	62	65	127	79	86	165
BGIOSGA000626	62	94	156	80	43	123	96	109	205	96	99	195	152	140	292
BGIOSGA000627	8	5	13	1	2	3	9	5	14	2	3	5	1	0	1
BGIOSGA000628	624	731	1355	2185	1295	3480	851	1156	2007	1704	1678	3382	1801	1570	3371
BGIOSGA000629	1150	865	2015	805	680	1485	700	848	1548	537	621	1158	574	570	1144
BGIOSGA000630	895	565	1460	846	694	1540	463	570	1033	777	754	1531	671	555	1226
BGIOSGA000631	2904	3469	6373	5808	2945	8753	2114	2483	4597	3989	4847	8836	3004	2749	5753
BGIOSGA000632	564	1192	1756	97	70	167	287	315	602	157	186	343	140	87	227
BGIOSGA000633	910	1672	2582	231	153	384	301	340	641	334	498	832	283	226	509
BGIOSGA000634	0	0	0	0	0	0	23	52	75	0	0	0	0	0	0
BGIOSGA000635	520	329	849	0	0	0	377	759	1136	0	2	2	0	0	0
BGIOSGA000636	0	0	0	0	0	0	1	2	3	3	2	5	4	2	6
BGIOSGA000637	0	0	0	0	0	0	0	0	0	0	1	1	4	1	5
BGIOSGA000638	4331	2066	6397	2215	2254	4469	3789	3690	7479	2191	3159	5350	1673	1620	3293
BGIOSGA000639	72	158	230	120	88	208	56	61	117	100	52	152	39	46	85
BGIOSGA000640	35	67	102	100	99	199	51	89	140	95	71	166	103	108	211
BGIOSGA000641	682	316	998	1460	880	2340	342	457	799	1116	1159	2275	902	873	1775
BGIOSGA000642	1770	1456	3226	1039	817	1856	1166	1191	2357	1535	1272	2807	745	718	1463
BGIOSGA000643	49	40	89	19	19	38	34	35	69	5	8	13	6	10	16
BGIOSGA000644	153	372	525	354	229	583	258	307	565	378	379	757	531	484	1015
BGIOSGA000645	662	568	1230	841	709	1550	629	653	1282	900	914	1814	843	792	1635
BGIOSGA000646	1	0	1	0	0	0	0	0	0	0	0	0	0	0	0
BGIOSGA000647	0	0	0	0	0	0	2	0	2	0	0	0	0	0	0
BGIOSGA000648	0	0	0	0	0	0	0	0	0	0	0	0	0	0	0
BGIOSGA000649	74	16	90	22	11	33	19	31	50	23	41	64	2	10	12
BGIOSGA000650	49	33	82	14	5	19	29	31	60	17	18	35	10	6	16
BGIOSGA000651	3	2	5	4	3	7	2	0	2	2	0	2	0	2	2
BGIOSGA000652	404	563	967	502	265	767	384	595	979	307	162	469	397	430	827
BGIOSGA000653	11	7	18	17	14	31	6	6	12	16	18	34	17	26	43
BGIOSGA000654	321	358	679	317	250	567	315	335	650	396	351	747	366	323	689
BGIOSGA000655	260	214	474	283	209	492	181	219	400	238	275	513	264	225	489
BGIOSGA000656	0	0	0	0	0	0	0	0	0	0	0	0	0	0	0
BGIOSGA000657	1410	773	2183	1706	1973	3679	1106	1162	2268	1582	1489	3071	1306	1379	2685
BGIOSGA000658	208	243	451	468	592	1060	563	501	1064	667	717	1384	627	669	1296
BGIOSGA000659	118	450	568	300	318	618	1499	1160	2659	468	526	994	351	345	696
BGIOSGA000660	13	30	43	7	26	33	38	51	89	49	41	90	7	9	16
BGIOSGA000661	12	8	20	8	6	14	3	7	10	6	7	13	5	4	9
BGIOSGA000662	776	811	1587	977	803	1780	639	751	1390	790	705	1495	845	875	1720
BGIOSGA000663	511	611	1122	569	441	1010	462	578	1040	409	435	844	431	415	846
BGIOSGA000664	0	1	1	0	0	0	0	0	0	0	0	0	0	0	0
BGIOSGA000665	0	0	0	0	0	0	0	0	0	0	0	0	0	0	0
BGIOSGA000666	20	8	28	10	17	27	8	15	23	8	12	20	25	18	43
BGIOSGA000667	7	0	7	0	0	0	2	0	2	4	2	6	2	15	17
BGIOSGA000668	214	105	319	248	157	405	109	176	285	176	204	380	214	239	453
BGIOSGA000669	27	59	86	110	80	190	5	0	5	17	15	32	34	20	54
BGIOSGA000670	299	165	464	646	465	1111	146	199	345	500	494	994	512	561	1073
BGIOSGA000671	0	0	0	0	0	0	0	0	0	0	0	0	0	0	0
BGIOSGA000672	52	16	68	84	40	124	19	38	57	40	41	81	45	37	82
BGIOSGA000673	0	0	0	0	1	1	0	0	0	0	6	6	1	3	4
BGIOSGA000674	457	332	789	538	371	909	242	317	559	425	379	804	308	352	660
BGIOSGA000675	0	0	0	0	0	0	0	0	0	0	0	0	0	0	0
BGIOSGA000676	2	2	4	0	3	3	1	4	5	5	1	6	0	2	2
BGIOSGA000677	117	41	158	104	104	208	204	139	343	127	139	266	116	80	196
BGIOSGA000678	0	0	0	0	0	0	0	0	0	0	0	0	0	0	0
BGIOSGA000679	1782	1163	2945	2602	3182	5784	1266	1387	2653	2292	1816	4108	1759	1934	3693
BGIOSGA000680	151	75	226	71	36	107	29	51	80	71	45	116	67	87	154
BGIOSGA000681	2	2	4	4	1	5	0	0	0	1	0	1	0	0	0
BGIOSGA000682	244	241	485	116	110	226	120	129	249	165	162	327	144	130	274
BGIOSGA000683	315	123	438	485	300	785	267	302	569	294	424	718	309	307	616
BGIOSGA000684	624	1077	1701	560	457	1017	510	588	1098	515	451	966	320	342	662
BGIOSGA000685	4	0	4	2	0	2	4	0	4	2	0	2	0	0	0
BGIOSGA000686	104	88	192	36	35	71	59	51	110	33	60	93	25	19	44
BGIOSGA000687	9	1	10	1	2	3	2	2	4	0	0	0	4	1	5
BGIOSGA000688	0	0	0	0	2	2	0	0	0	0	0	0	0	0	0
BGIOSGA000689	27	46	73	92	89	181	90	92	182	106	50	156	97	71	168
BGIOSGA000690	789	775	1564	746	504	1250	1534	1491	3025	951	701	1652	806	786	1592
BGIOSGA000691	380	264	644	337	274	611	142	207	349	244	243	487	379	385	764
BGIOSGA000692	178	213	391	417	353	770	195	303	498	346	377	723	424	387	811
BGIOSGA000693	871	770	1641	944	818	1762	1430	1868	3298	1292	1333	2625	1359	1262	2621
BGIOSGA000694	0	0	0	1	3	4	0	0	0	0	0	0	0	1	1
BGIOSGA000695	0	0	0	0	0	0	0	0	0	0	0	0	0	0	0
BGIOSGA000696	1	0	1	0	0	0	0	0	0	1	0	1	0	0	0
BGIOSGA000697	20	10	30	39	12	51	9	8	17	38	15	53	25	18	43
BGIOSGA000698	1063	839	1902	527	445	972	887	915	1802	579	611	1190	373	432	805
BGIOSGA000699	93	71	164	90	127	217	54	58	112	57	61	118	40	88	128
BGIOSGA000700	0	0	0	0	0	0	0	0	0	0	0	0	0	0	0
BGIOSGA000701	0	0	0	0	0	0	0	1	1	1	0	1	0	0	0
BGIOSGA000702	427	208	635	475	415	890	819	820	1639	532	645	1177	620	502	1122
BGIOSGA000703	8	14	22	24	10	34	11	3	14	4	0	4	5	6	11
BGIOSGA000704	120	110	230	90	56	146	105	151	256	65	110	175	117	148	265
BGIOSGA000705	0	0	0	0	0	0	0	0	0	0	0	0	0	0	0
BGIOSGA000706	2147	1243	3390	3828	2754	6582	1110	1277	2387	3634	4184	7818	2845	2656	5501
BGIOSGA000707	0	1	1	2	2	4	1	1	2	6	4	10	3	1	4
BGIOSGA000708	0	0	0	0	0	0	0	0	0	0	0	0	0	0	0
BGIOSGA000709	0	0	0	0	0	0	0	0	0	0	0	0	0	0	0
BGIOSGA000710	0	0	0	0	0	0	0	0	0	0	0	0	0	0	0
BGIOSGA000711	0	0	0	0	0	0	0	0	0	0	0	0	0	0	0
BGIOSGA000712	0	0	0	0	0	0	0	0	0	0	0	0	0	0	0
BGIOSGA000713	22	150	172	76	52	128	73	111	184	72	24	96	63	70	133
BGIOSGA000714	0	0	0	0	0	0	0	0	0	0	0	0	0	0	0
BGIOSGA000715	10	2	12	8	7	15	17	7	24	18	11	29	18	9	27
BGIOSGA000716	138	111	249	156	141	297	274	370	644	67	68	135	93	97	190
BGIOSGA000717	251	234	485	258	137	395	247	227	474	189	163	352	165	147	312
BGIOSGA000718	195	135	330	211	134	345	67	84	151	123	126	249	169	174	343
BGIOSGA000719	774	1132	1906	935	1043	1978	1087	1200	2287	1402	1210	2612	1112	1223	2335
BGIOSGA000720	1416	1948	3364	1471	886	2357	500	580	1080	377	503	880	492	378	870
BGIOSGA000721	525	458	983	785	645	1430	484	556	1040	755	931	1686	845	669	1514
BGIOSGA000722	0	0	0	0	0	0	0	0	0	0	0	0	0	0	0
BGIOSGA000723	783	828	1611	822	621	1443	698	825	1523	862	954	1816	820	811	1631
BGIOSGA000724	347	887	1234	2585	2513	5098	628	849	1477	7244	6703	13947	5757	6063	11820
BGIOSGA000725	2035	2414	4449	3444	2641	6085	1459	1606	3065	2914	2761	5675	2304	2682	4986
BGIOSGA000726	1871	708	2579	2129	1461	3590	1999	2140	4139	3167	3633	6800	3023	2542	5565
BGIOSGA000727	5	0	5	2	0	2	0	0	0	7	0	7	0	1	1
BGIOSGA000728	1653	5130	6783	216	181	397	925	982	1907	810	921	1731	532	403	935
BGIOSGA000729	15	14	29	7	12	19	7	9	16	6	8	14	10	10	20
BGIOSGA000730	441	241	682	500	435	935	187	196	383	339	360	699	388	379	767
BGIOSGA000731	147	146	293	449	299	748	98	102	200	213	273	486	433	407	840
BGIOSGA000732	5	11	16	53	46	99	19	7	26	249	323	572	380	503	883
BGIOSGA000733	152	126	278	50	50	100	186	126	312	69	69	138	200	178	378
BGIOSGA000734	647	468	1115	1093	931	2024	577	578	1155	1018	1039	2057	1029	921	1950
BGIOSGA000735	73	63	136	74	51	125	65	62	127	66	48	114	68	47	115
BGIOSGA000736	190	30	220	14	8	22	9	4	13	7	0	7	0	6	6
BGIOSGA000737	878	620	1498	771	567	1338	663	852	1515	806	825	1631	1003	988	1991
BGIOSGA000738	1965	1010	2975	3180	2496	5676	840	1048	1888	2441	3107	5548	2868	2880	5748
BGIOSGA000739	238	54	292	513	349	862	66	97	163	337	294	631	308	242	550
BGIOSGA000740	0	0	0	0	0	0	0	0	0	0	0	0	0	0	0
BGIOSGA000741	371	33	404	76	71	147	286	306	592	91	72	163	71	60	131
BGIOSGA000742	235	298	533	269	174	443	152	185	337	239	223	462	195	223	418
BGIOSGA000743	540	463	1003	502	391	893	381	338	719	793	658	1451	528	575	1103
BGIOSGA000744	225	124	349	34	44	78	130	163	293	14	36	50	16	8	24
BGIOSGA000745	462	145	607	55	66	121	36	77	113	14	13	27	1	0	1
BGIOSGA000746	1360	1585	2945	811	786	1597	1419	1535	2954	939	983	1922	682	582	1264
BGIOSGA000747	348	247	595	260	232	492	167	216	383	124	121	245	148	118	266
BGIOSGA000748	57	92	149	65	78	143	129	128	257	68	85	153	43	51	94
BGIOSGA000749	2	2	4	0	2	2	2	3	5	4	3	7	4	2	6
BGIOSGA000750	523	906	1429	241	138	379	377	438	815	214	241	455	165	133	298
BGIOSGA000751	3225	3321	6546	4150	2580	6730	1714	2285	3999	4110	4453	8563	4014	4076	8090
BGIOSGA000752	1557	1105	2662	917	935	1852	1641	1658	3299	976	1371	2347	913	828	1741
BGIOSGA000753	0	3	3	2	0	2	11	14	25	0	0	0	2	0	2
BGIOSGA000754	277	280	557	278	355	633	213	197	410	123	137	260	112	110	222
BGIOSGA000755	8	8	16	34	92	126	8	4	12	177	101	278	119	180	299
BGIOSGA000756	27	35	62	23	55	78	27	39	66	28	12	40	15	17	32
BGIOSGA000757	16	12	28	18	12	30	17	11	28	19	20	39	9	16	25
BGIOSGA000758	309	339	648	108	98	206	262	303	565	84	82	166	88	77	165
BGIOSGA000759	129	79	208	135	75	210	116	163	279	87	101	188	93	79	172
BGIOSGA000760	83	43	126	123	73	196	88	105	193	108	126	234	152	141	293
BGIOSGA000761	62	72	134	71	30	101	26	55	81	47	63	110	21	20	41
BGIOSGA000762	19	17	36	21	18	39	1	1	2	1	2	3	0	1	1
BGIOSGA000763	381	267	648	490	283	773	172	190	362	261	301	562	316	378	694
BGIOSGA000764	161	101	262	129	74	203	41	69	110	83	74	157	104	110	214
BGIOSGA000765	713	218	931	674	551	1225	469	545	1014	751	755	1506	812	730	1542
BGIOSGA000766	19568	16872	36440	2870	1933	4803	27346	27764	55110	4225	4226	8451	1519	1336	2855
BGIOSGA000767	129	109	238	412	606	1018	222	311	533	384	441	825	1044	795	1839
BGIOSGA000768	0	2	2	3	0	3	0	2	2	2	1	3	0	4	4
BGIOSGA000769	777	722	1499	385	297	682	581	657	1238	438	516	954	376	371	747
BGIOSGA000770	326	282	608	143	75	218	115	122	237	140	119	259	59	123	182
BGIOSGA000771	12	11	23	3	3	6	15	6	21	5	55	60	10	15	25
BGIOSGA000772	320	166	486	1026	525	1551	171	231	402	589	563	1152	543	487	1030
BGIOSGA000773	1012	1094	2106	1426	1099	2525	956	1238	2194	1163	973	2136	1176	1143	2319
BGIOSGA000774	388	214	602	614	439	1053	358	378	736	752	698	1450	456	426	882
BGIOSGA000775	25	36	61	38	32	70	14	22	36	42	38	80	18	28	46
BGIOSGA000776	902	592	1494	1798	1463	3261	606	581	1187	2419	2339	4758	1364	1330	2694
BGIOSGA000777	0	0	0	0	0	0	0	0	0	0	0	0	1	0	1
BGIOSGA000778	46	16	62	143	97	240	11	3	14	105	86	191	47	36	83
BGIOSGA000779	70	72	142	392	232	624	87	104	191	117	54	171	93	162	255
BGIOSGA000780	354	381	735	594	388	982	333	448	781	464	498	962	536	573	1109
BGIOSGA000781	120	54	174	211	97	308	56	66	122	134	135	269	64	49	113
BGIOSGA000782	2	16	18	0	11	11	9	5	14	15	4	19	3	13	16
BGIOSGA000783	12562	28370	40932	33347	22278	55625	13573	15294	28867	21785	21135	42920	18644	18807	37451
BGIOSGA000784	530	474	1004	659	539	1198	477	587	1064	612	763	1375	518	689	1207
BGIOSGA000785	0	0	0	0	0	0	0	0	0	0	0	0	0	0	0
BGIOSGA000786	136	114	250	82	67	149	95	144	239	62	107	169	96	95	191
BGIOSGA000787	0	0	0	0	0	0	0	2	2	0	0	0	0	0	0
BGIOSGA000788	61	50	111	78	148	226	6	12	18	21	17	38	8	18	26
BGIOSGA000789	2	0	2	624	441	1065	14	27	41	770	727	1497	429	324	753
BGIOSGA000790	333	575	908	470	375	845	880	888	1768	479	517	996	193	204	397
BGIOSGA000791	1265	1191	2456	1447	1372	2819	887	1064	1951	1170	1305	2475	1023	919	1942
BGIOSGA000792	27	28	55	110	69	179	47	81	128	155	131	286	154	179	333
BGIOSGA000793	278	318	596	322	296	618	242	284	526	340	325	665	238	323	561
BGIOSGA000794	0	2	2	0	0	0	0	1	1	0	0	0	0	0	0
BGIOSGA000795	6	8	14	7	22	29	2	2	4	10	20	30	2	4	6
BGIOSGA000796	177	112	289	219	98	317	105	121	226	149	149	298	175	127	302
BGIOSGA000797	222	172	394	93	51	144	107	146	253	60	104	164	86	76	162
BGIOSGA000798	1112	696	1808	1147	800	1947	1167	1362	2529	1072	1147	2219	1024	919	1943
BGIOSGA000799	713	1094	1807	757	508	1265	1499	1989	3488	622	515	1137	675	568	1243
BGIOSGA000800	10	4	14	11	9	20	8	7	15	4	6	10	7	4	11
BGIOSGA000801	1884	1828	3712	4871	3079	7950	1873	2329	4202	3896	3777	7673	5772	5157	10929
BGIOSGA000802	303	836	1139	334	320	654	610	438	1048	102	118	220	101	102	203
BGIOSGA000803	0	0	0	3	1	4	1	8	9	0	1	1	5	0	5
BGIOSGA000804	31	40	71	15	23	38	114	144	258	101	120	221	90	70	160
BGIOSGA000805	690	638	1328	849	568	1417	249	329	578	369	383	752	428	398	826
BGIOSGA000806	17	4	21	17	10	27	10	11	21	10	21	31	16	7	23
BGIOSGA000807	57	39	96	77	60	137	38	32	70	56	70	126	60	54	114
BGIOSGA000808	5	0	5	0	0	0	0	0	0	0	0	0	0	0	0
BGIOSGA000809	1504	1541	3045	1514	1111	2625	1267	1308	2575	1403	1484	2887	1008	938	1946
BGIOSGA000810	920	441	1361	924	596	1520	390	482	872	861	966	1827	573	637	1210
BGIOSGA000811	622	639	1261	563	508	1071	447	579	1026	566	513	1079	474	434	908
BGIOSGA000812	816	539	1355	954	992	1946	711	848	1559	518	508	1026	550	582	1132
BGIOSGA000813	538	607	1145	1160	841	2001	586	759	1345	1163	998	2161	858	894	1752
BGIOSGA000814	8	6	14	28	12	40	31	32	63	81	78	159	150	152	302
BGIOSGA000815	1028	864	1892	878	694	1572	887	938	1825	1089	1173	2262	959	889	1848
BGIOSGA000816	2082	2015	4097	3833	1965	5798	2294	2471	4765	3217	2970	6187	3315	3211	6526
BGIOSGA000817	143	86	229	239	188	427	52	81	133	123	129	252	180	138	318
BGIOSGA000818	300	217	517	382	201	583	194	259	453	274	291	565	325	246	571
BGIOSGA000819	4619	3998	8617	7255	5302	12557	4229	4862	9091	6049	6580	12629	6483	6206	12689
BGIOSGA000820	873	851	1724	565	413	978	537	610	1147	452	474	926	320	261	581
BGIOSGA000821	509	743	1252	1462	1040	2502	860	909	1769	1393	940	2333	1216	1454	2670
BGIOSGA000822	1692	1668	3360	1745	1195	2940	1735	1946	3681	1855	1955	3810	1529	1320	2849
BGIOSGA000823	162	402	564	434	359	793	242	228	470	577	535	1112	246	247	493
BGIOSGA000824	179	326	505	280	119	399	476	684	1160	409	526	935	203	136	339
BGIOSGA000825	64	35	99	60	31	91	37	50	87	28	28	56	16	18	34
BGIOSGA000826	809	1845	2654	2173	1366	3539	1813	1882	3695	2070	1647	3717	1847	1804	3651
BGIOSGA000827	1669	1721	3390	1760	1199	2959	1813	2016	3829	3004	3727	6731	1613	1447	3060
BGIOSGA000828	824	672	1496	1173	1055	2228	731	796	1527	1240	1308	2548	1038	989	2027
BGIOSGA000829	17	77	94	24	16	40	35	28	63	18	6	24	9	10	19
BGIOSGA000830	102	1110	1212	432	262	694	1126	982	2108	394	226	620	138	139	277
BGIOSGA000831	122	122	244	211	167	378	134	184	318	171	132	303	192	192	384
BGIOSGA000832	20	7	27	26	18	44	21	23	44	57	72	129	58	90	148
BGIOSGA000833	738	884	1622	743	319	1062	577	817	1394	676	738	1414	413	497	910
BGIOSGA000834	563	737	1300	383	428	811	687	645	1332	359	464	823	369	364	733
BGIOSGA000835	20	21	41	68	46	114	26	21	47	56	59	115	77	80	157
BGIOSGA000836	475	181	656	314	285	599	353	352	705	375	326	701	174	174	348
BGIOSGA000837	2920	785	3705	2511	1802	4313	1556	1852	3408	2116	2438	4554	1667	1490	3157
BGIOSGA000838	0	0	0	0	0	0	0	0	0	0	0	0	2	0	2
BGIOSGA000839	13	41	54	39	64	103	15	51	66	62	77	139	19	31	50
BGIOSGA000840	359	574	933	1250	874	2124	343	459	802	1539	1291	2830	1531	1709	3240
BGIOSGA000841	0	2	2	0	1	1	0	0	0	0	0	0	0	0	0
BGIOSGA000842	0	8	8	0	0	0	3	1	4	3	0	3	0	0	0
BGIOSGA000843	1104	980	2084	1530	833	2363	910	1014	1924	1355	1588	2943	1285	1111	2396
BGIOSGA000844	2854	2714	5568	3212	2174	5386	2161	2836	4997	3026	3307	6333	3720	3402	7122
BGIOSGA000845	618	391	1009	592	469	1061	288	303	591	342	324	666	397	385	782
BGIOSGA000846	383	297	680	464	366	830	148	193	341	321	319	640	354	356	710
BGIOSGA000847	198	488	686	209	207	416	413	456	869	152	216	368	59	62	121
BGIOSGA000848	52	57	109	104	77	181	56	85	141	60	70	130	68	73	141
BGIOSGA000849	3159	853	4012	1245	754	1999	816	872	1688	1160	1326	2486	454	450	904
BGIOSGA000850	719	406	1125	348	298	646	290	309	599	196	260	456	187	179	366
BGIOSGA000851	297	317	614	384	145	529	186	234	420	212	224	436	314	281	595
BGIOSGA000852	0	0	0	0	0	0	0	0	0	0	0	0	0	0	0
BGIOSGA000853	1084	1082	2166	1143	930	2073	1258	1478	2736	973	1292	2265	1436	1178	2614
BGIOSGA000854	943	524	1467	1045	859	1904	758	682	1440	3187	2628	5815	2539	2491	5030
BGIOSGA000855	1554	1136	2690	2351	1701	4052	1777	1822	3599	1478	1795	3273	2156	1822	3978
BGIOSGA000856	1838	1696	3534	2726	2062	4788	3333	2936	6269	2204	2747	4951	3061	2439	5500
BGIOSGA000857	0	0	0	0	0	0	0	0	0	0	0	0	0	0	0
BGIOSGA000858	3931	3008	6939	4267	3328	7595	2711	3233	5944	4750	5101	9851	3948	3650	7598
BGIOSGA000859	2292	2342	4634	3541	1999	5540	3521	3704	7225	4060	4123	8183	2201	2379	4580
BGIOSGA000860	79	54	133	37	36	73	40	44	84	42	26	68	26	20	46
BGIOSGA000861	769	960	1729	1423	931	2354	964	1063	2027	1174	1420	2594	1803	1689	3492
BGIOSGA000862	26	36	62	47	51	98	16	20	36	40	12	52	23	27	50
BGIOSGA000863	229	329	558	114	126	240	170	194	364	110	95	205	85	85	170
BGIOSGA000864	64	216	280	1150	757	1907	109	163	272	465	546	1011	537	461	998
BGIOSGA000865	211	95	306	131	107	238	64	86	150	59	117	176	17	14	31
BGIOSGA000866	0	4	4	9	3	12	0	3	3	1	3	4	0	1	1
BGIOSGA000867	669	396	1065	1099	820	1919	487	630	1117	1342	1450	2792	1991	1817	3808
BGIOSGA000868	369	338	707	197	149	346	323	292	615	143	164	307	93	87	180
BGIOSGA000869	4	1	5	3	0	3	0	3	3	1	2	3	0	0	0
BGIOSGA000870	71	12	83	6	20	26	2	10	12	27	26	53	1	4	5
BGIOSGA000871	627	709	1336	719	568	1287	763	763	1526	564	642	1206	523	455	978
BGIOSGA000872	1127	768	1895	1052	806	1858	739	929	1668	891	1184	2075	758	787	1545
BGIOSGA000873	75	42	117	63	57	120	106	121	227	109	122	231	83	74	157
BGIOSGA000874	16	35	51	57	21	78	45	70	115	60	31	91	31	34	65
BGIOSGA000875	15	25	40	116	56	172	4	18	22	39	36	75	29	44	73
BGIOSGA000876	80	82	162	141	113	254	65	84	149	154	156	310	84	77	161
BGIOSGA000877	7	6	13	9	27	36	7	2	9	28	23	51	40	34	74
BGIOSGA000878	97	329	426	1419	1602	3021	445	796	1241	1646	1008	2654	7147	5615	12762
BGIOSGA000879	113	244	357	208	157	365	207	238	445	253	171	424	252	267	519
BGIOSGA000880	183	97	280	179	114	293	76	106	182	116	129	245	148	117	265
BGIOSGA000881	14	2	16	52	37	89	11	5	16	15	34	49	49	78	127
BGIOSGA000882	0	0	0	1	1	2	0	0	0	0	0	0	0	0	0
BGIOSGA000883	222	144	366	663	459	1122	170	226	396	488	416	904	300	252	552
BGIOSGA000884	595	534	1129	950	730	1680	558	628	1186	1121	1151	2272	902	913	1815
BGIOSGA000885	578	1063	1641	151	154	305	192	274	466	108	117	225	108	83	191
BGIOSGA000886	371	214	585	30	19	49	91	50	141	20	17	37	7	13	20
BGIOSGA000887	26	49	75	36	18	54	30	45	75	27	11	38	25	33	58
BGIOSGA000888	129	313	442	195	241	436	523	439	962	494	229	723	478	580	1058
BGIOSGA000889	0	0	0	0	0	0	0	0	0	0	0	0	0	0	0
BGIOSGA000890	5	2	7	4	4	8	3	7	10	0	0	0	0	1	1
BGIOSGA000891	0	0	0	0	0	0	0	0	0	0	0	0	0	0	0
BGIOSGA000892	25	32	57	14	11	25	67	119	186	60	43	103	62	56	118
BGIOSGA000893	104	25	129	42	21	63	18	63	81	26	24	50	3	13	16
BGIOSGA000894	7	7	14	9	5	14	0	5	5	5	5	10	4	3	7
BGIOSGA000895	24	15	39	2	9	11	21	24	45	8	23	31	6	14	20
BGIOSGA000896	1019	652	1671	135	103	238	260	303	563	198	312	510	343	239	582
BGIOSGA000897	1931	1281	3212	2813	2095	4908	2242	2573	4815	2846	3061	5907	2916	2765	5681
BGIOSGA000898	4	4	8	2	1	3	7	6	13	11	13	24	5	0	5
BGIOSGA000899	1503	761	2264	6081	1474	7555	1886	2539	4425	4041	4464	8505	3544	3190	6734
BGIOSGA000900	409	205	614	403	222	625	325	317	642	291	321	612	232	276	508
BGIOSGA000901	1929	1603	3532	4426	2551	6977	656	799	1455	1513	1141	2654	1741	1772	3513
BGIOSGA000902	3586	3424	7010	1540	1254	2794	2535	2773	5308	1621	1683	3304	997	999	1996
BGIOSGA000903	0	0	0	1	0	1	0	0	0	0	0	0	0	0	0
BGIOSGA000904	0	2	2	0	0	0	0	0	0	0	0	0	0	0	0
BGIOSGA000905	4123	3573	7696	5950	4540	10490	5110	5044	10154	7794	8823	16617	7610	8404	16014
BGIOSGA000906	83	161	244	269	37	306	271	253	524	164	238	402	245	197	442
BGIOSGA000907	3154	4499	7653	5215	3489	8704	4633	5971	10604	5300	6599	11899	7269	7129	14398
BGIOSGA000908	35	33	68	18	5	23	29	8	37	18	14	32	7	7	14
BGIOSGA000909	0	0	0	7	2	9	0	0	0	0	0	0	0	0	0
BGIOSGA000910	1	11	12	0	0	0	15	13	28	1	1	2	0	0	0
BGIOSGA000911	1419	640	2059	946	750	1696	437	447	884	1144	931	2075	1076	976	2052
BGIOSGA000912	53	91	144	131	74	205	68	80	148	118	129	247	171	172	343
BGIOSGA000913	1955	2668	4623	767	678	1445	1608	1607	3215	738	820	1558	511	513	1024
BGIOSGA000914	41	25	66	48	25	73	26	30	56	28	38	66	36	34	70
BGIOSGA000915	677	399	1076	616	659	1275	275	393	668	492	555	1047	493	445	938
BGIOSGA000916	31	32	63	7	6	13	27	50	77	19	18	37	3	6	9
BGIOSGA000917	229	134	363	333	291	624	80	84	164	136	133	269	93	92	185
BGIOSGA000918	0	0	0	0	0	0	0	0	0	0	0	0	0	0	0
BGIOSGA000919	133	113	246	159	111	270	65	89	154	109	143	252	160	169	329
BGIOSGA000920	1029	1058	2087	1318	984	2302	1078	1192	2270	1146	1258	2404	1799	1416	3215
BGIOSGA000921	2	1	3	2	2	4	3	2	5	9	4	13	1	0	1
BGIOSGA000922	562	916	1478	685	477	1162	664	671	1335	691	796	1487	687	658	1345
BGIOSGA000923	2344	1673	4017	2067	1714	3781	1363	1546	2909	2023	2752	4775	2204	2103	4307
BGIOSGA000924	0	0	0	0	0	0	0	0	0	0	0	0	0	0	0
BGIOSGA000925	1239	1047	2286	277	259	536	1323	1456	2779	174	186	360	71	52	123
BGIOSGA000926	190	125	315	116	91	207	56	95	151	198	192	390	165	148	313
BGIOSGA000927	4	10	14	16	14	30	8	5	13	5	6	11	4	11	15
BGIOSGA000928	0	0	0	2	0	2	2	2	4	1	3	4	0	6	6
BGIOSGA000929	31	96	127	278	230	508	295	224	519	453	181	634	304	328	632
BGIOSGA000930	0	3	3	9	4	13	7	8	15	16	2	18	16	0	16
BGIOSGA000931	9	9	18	10	16	26	3	5	8	1	1	2	0	1	1
BGIOSGA000932	2686	4234	6920	1666	1683	3349	461	467	928	257	319	576	244	238	482
BGIOSGA000933	14	10	24	23	25	48	8	8	16	35	20	55	12	11	23
BGIOSGA000934	103	53	156	60	42	102	46	66	112	33	35	68	35	30	65
BGIOSGA000935	4253	3376	7629	8960	5770	14730	2559	2520	5079	10760	9578	20338	5095	5512	10607
BGIOSGA000936	0	0	0	0	0	0	3	0	3	0	0	0	0	0	0
BGIOSGA000937	189	174	363	294	168	462	145	195	340	174	193	367	132	140	272
BGIOSGA000938	690	502	1192	1041	566	1607	443	476	919	1053	919	1972	769	718	1487
BGIOSGA000939	537	441	978	1376	944	2320	445	422	867	1143	917	2060	547	599	1146
BGIOSGA000940	88	35	123	77	70	147	54	50	104	57	56	113	35	33	68
BGIOSGA000941	18	6	24	6	4	10	4	5	9	23	14	37	9	6	15
BGIOSGA000942	421	227	648	431	551	982	386	402	788	375	412	787	357	292	649
BGIOSGA000943	262	264	526	548	253	801	373	435	808	404	478	882	560	539	1099
BGIOSGA000944	210	137	347	166	63	229	97	97	194	95	187	282	179	168	347
BGIOSGA000945	215	56	271	447	415	862	295	342	637	1474	1370	2844	3282	3642	6924
BGIOSGA000946	7	9	16	11	2	13	22	25	47	21	22	43	8	7	15
BGIOSGA000947	277	444	721	259	167	426	205	240	445	149	186	335	242	228	470
BGIOSGA000948	160	1594	1754	283	186	469	748	620	1368	297	282	579	443	274	717
BGIOSGA000949	0	0	0	1	1	2	0	0	0	0	0	0	1	0	1
BGIOSGA000950	0	0	0	0	0	0	4	0	4	0	0	0	0	6	6
BGIOSGA000951	0	0	0	0	0	0	0	0	0	0	0	0	0	0	0
BGIOSGA000952	128	157	285	26	13	39	84	79	163	18	31	49	0	2	2
BGIOSGA000953	196	107	303	200	128	328	72	74	146	130	116	246	146	107	253
BGIOSGA000954	218	111	329	97	92	189	77	84	161	170	197	367	156	206	362
BGIOSGA000955	70	80	150	103	46	149	51	48	99	49	74	123	185	150	335
BGIOSGA000956	0	3	3	0	4	4	0	0	0	1	0	1	0	2	2
BGIOSGA000957	162	530	692	217	292	509	1020	910	1930	442	271	713	123	66	189
BGIOSGA000958	394	656	1050	459	574	1033	1164	1198	2362	917	393	1310	240	224	464
BGIOSGA000959	0	0	0	0	1	1	1	0	1	1	5	6	0	0	0
BGIOSGA000960	0	0	0	0	0	0	0	0	0	0	0	0	2	4	6
BGIOSGA000961	782	402	1184	1236	845	2081	677	774	1451	915	881	1796	778	719	1497
BGIOSGA000962	2	0	2	0	2	2	0	0	0	0	0	0	0	2	2
BGIOSGA000963	1	0	1	0	3	3	0	0	0	0	0	0	0	2	2
BGIOSGA000964	0	0	0	0	0	0	0	0	0	0	0	0	0	0	0
BGIOSGA000965	6	10	16	1	3	4	6	5	11	2	2	4	0	0	0
BGIOSGA000966	0	0	0	0	0	0	1	0	1	0	0	0	0	0	0
BGIOSGA000967	0	0	0	0	0	0	0	0	0	0	0	0	0	0	0
BGIOSGA000968	625	250	875	603	378	981	631	661	1292	339	610	949	241	159	400
BGIOSGA000969	49	45	94	14	15	29	127	139	266	50	92	142	59	48	107
BGIOSGA000970	58	47	105	41	50	91	29	28	57	39	42	81	34	44	78
BGIOSGA000971	286	194	480	191	152	343	127	175	302	116	159	275	91	160	251
BGIOSGA000972	0	0	0	0	0	0	1	0	1	0	0	0	0	0	0
BGIOSGA000973	323	288	611	257	163	420	176	216	392	150	165	315	186	164	350
BGIOSGA000974	144	85	229	223	311	534	105	139	244	194	140	334	163	153	316
BGIOSGA000975	0	0	0	0	2	2	0	0	0	2	2	4	0	3	3
BGIOSGA000976	6	3	9	26	7	33	2	0	2	0	0	0	1	1	2
BGIOSGA000977	2474	1734	4208	2581	2221	4802	1360	1319	2679	2605	2914	5519	2078	2119	4197
BGIOSGA000978	251	154	405	314	192	506	140	183	323	289	305	594	366	392	758
BGIOSGA000979	256	119	375	376	302	678	82	163	245	230	221	451	283	280	563
BGIOSGA000980	1170	824	1994	1899	1330	3229	702	922	1624	1535	1537	3072	1510	1581	3091
BGIOSGA000981	0	0	0	0	0	0	0	0	0	0	0	0	0	0	0
BGIOSGA000982	909	1947	2856	2422	2614	5036	3426	3190	6616	3484	2708	6192	3107	2720	5827
BGIOSGA000983	0	0	0	0	0	0	0	0	0	0	0	0	0	0	0
BGIOSGA000984	0	0	0	0	0	0	0	0	0	0	0	0	0	0	0
BGIOSGA000985	754	1230	1984	966	597	1563	1192	1349	2541	957	949	1906	865	755	1620
BGIOSGA000986	0	0	0	0	0	0	0	0	0	0	0	0	0	0	0
BGIOSGA000987	40	25	65	63	30	93	92	154	246	20	59	79	54	22	76
BGIOSGA000988	112	98	210	223	112	335	144	178	322	77	85	162	27	21	48
BGIOSGA000989	837	784	1621	662	558	1220	578	740	1318	983	965	1948	899	788	1687
BGIOSGA000990	12	22	34	11	3	14	35	32	67	19	17	36	37	26	63
BGIOSGA000991	0	0	0	0	0	0	0	0	0	0	0	0	0	0	0
BGIOSGA000992	82	64	146	73	47	120	51	54	105	175	194	369	131	140	271
BGIOSGA000993	294	402	696	401	316	717	40	37	77	93	111	204	80	93	173
BGIOSGA000994	34	29	63	23	33	56	11	16	27	38	60	98	46	84	130
BGIOSGA000995	1435	2556	3991	1230	1225	2455	1274	1488	2762	1784	1946	3730	1322	1351	2673
BGIOSGA000996	90	66	156	167	103	270	69	85	154	110	92	202	130	115	245
BGIOSGA000997	113	206	319	9	28	37	182	217	399	54	87	141	84	42	126
BGIOSGA000998	1218	1392	2610	1539	1101	2640	887	1238	2125	1378	1438	2816	1432	1600	3032
BGIOSGA000999	13	7	20	4	1	5	10	13	23	3	13	16	0	2	2
BGIOSGA001000	152	263	415	248	223	471	242	263	505	179	213	392	151	155	306
BGIOSGA001001	490	556	1046	1142	809	1951	585	840	1425	1215	1131	2346	1213	1174	2387
BGIOSGA001002	0	0	0	0	0	0	0	0	0	0	0	0	0	0	0
BGIOSGA001003	159	212	371	264	265	529	435	522	957	340	373	713	535	375	910
BGIOSGA001004	973	1302	2275	901	813	1714	881	1050	1931	835	934	1769	1048	974	2022
BGIOSGA001005	184	170	354	366	359	725	123	171	294	182	147	329	217	179	396
BGIOSGA001006	179	145	324	293	232	525	26	19	45	35	29	64	21	29	50
BGIOSGA001007	23	20	43	8	4	12	16	32	48	26	18	44	19	17	36
BGIOSGA001008	769	456	1225	838	603	1441	360	484	844	537	652	1189	955	912	1867
BGIOSGA001009	67	53	120	139	92	231	27	37	64	66	61	127	91	81	172
BGIOSGA001010	90	31	121	223	114	337	14	27	41	146	127	273	219	248	467
BGIOSGA001011	335	357	692	180	175	355	162	158	320	88	117	205	125	109	234
BGIOSGA001012	1259	1322	2581	1600	1279	2879	1351	1679	3030	1745	1870	3615	2123	2332	4455
BGIOSGA001013	3359	4731	8090	7519	4481	12000	2615	2947	5562	4861	5872	10733	3790	3117	6907
BGIOSGA001014	0	0	0	3	0	3	0	0	0	0	0	0	0	0	0
BGIOSGA001015	4	72	76	8	4	12	13	23	36	7	1	8	16	11	27
BGIOSGA001016	169	74	243	107	98	205	43	90	133	54	70	124	90	70	160
BGIOSGA001017	0	0	0	0	0	0	1	0	1	4	0	4	0	0	0
BGIOSGA001018	1010	1136	2146	2188	1684	3872	736	773	1509	2137	1992	4129	1810	1506	3316
BGIOSGA001019	24	21	45	42	21	63	13	15	28	57	25	82	43	32	75
BGIOSGA001020	1757	1033	2790	1395	1117	2512	1138	1282	2420	1112	1238	2350	576	449	1025
BGIOSGA001021	363	241	604	374	242	616	329	406	735	333	332	665	235	232	467
BGIOSGA001022	5914	8606	14520	10191	5242	15433	10552	12653	23205	9288	9453	18741	8619	8366	16985
BGIOSGA001023	98	99	197	262	104	366	170	154	324	190	233	423	164	111	275
BGIOSGA001024	158	131	289	178	75	253	149	211	360	149	137	286	264	224	488
BGIOSGA001025	1666	1588	3254	1433	1262	2695	1089	1296	2385	1162	1394	2556	2213	1671	3884
BGIOSGA001026	0	0	0	0	0	0	17	16	33	39	41	80	26	30	56
BGIOSGA001027	0	0	0	0	0	0	0	0	0	0	0	0	0	0	0
BGIOSGA001028	5	16	21	10	11	21	12	15	27	13	5	18	3	2	5
BGIOSGA001029	190	184	374	343	418	761	262	245	507	386	332	718	424	520	944
BGIOSGA001030	1446	1243	2689	1074	803	1877	1295	1431	2726	1436	1562	2998	1060	1042	2102
BGIOSGA001031	1	0	1	5	0	5	2	0	2	0	4	4	4	2	6
BGIOSGA001032	7182	6577	13759	914	842	1756	5478	5132	10610	1285	1253	2538	540	593	1133
BGIOSGA001033	1062	1345	2407	1428	980	2408	1319	1489	2808	1472	1614	3086	1378	1188	2566
BGIOSGA001034	1714	864	2578	1427	1078	2505	1032	1175	2207	1193	1557	2750	1242	1049	2291
BGIOSGA001035	581	604	1185	1006	581	1587	737	864	1601	1091	907	1998	1126	1096	2222
BGIOSGA001036	287	229	516	199	139	338	242	341	583	174	170	344	167	166	333
BGIOSGA001037	5447	4227	9674	5355	4801	10156	4158	4744	8902	5177	5480	10657	5641	5277	10918
BGIOSGA001038	854	933	1787	1298	964	2262	851	975	1826	946	1132	2078	1396	961	2357
BGIOSGA001039	0	0	0	1	0	1	0	0	0	0	0	0	1	1	2
BGIOSGA001040	0	1	1	4	4	8	0	4	4	1	0	1	0	0	0
BGIOSGA001041	820	1395	2215	2732	1802	4534	1058	1059	2117	1804	1803	3607	1929	1971	3900
BGIOSGA001042	2404	1909	4313	3646	2447	6093	1393	1592	2985	3997	4381	8378	2866	3043	5909
BGIOSGA001043	26	13	39	44	22	66	3	8	11	22	16	38	18	20	38
BGIOSGA001044	174	407	581	30	23	53	265	270	535	30	25	55	16	19	35
BGIOSGA001045	866	905	1771	1118	565	1683	0	0	0	0	9	9	0	0	0
BGIOSGA001046	1010	632	1642	1760	1208	2968	654	952	1606	1341	1450	2791	1290	1402	2692
BGIOSGA001047	66	45	111	115	105	220	48	60	108	211	225	436	186	135	321
BGIOSGA001048	97	77	174	73	52	125	114	105	219	64	85	149	103	97	200
BGIOSGA001049	245	353	598	568	409	977	535	589	1124	685	807	1492	1006	851	1857
BGIOSGA001050	35	51	86	19	6	25	74	62	136	41	51	92	34	20	54
BGIOSGA001051	55	87	142	98	54	152	38	65	103	33	63	96	55	76	131
BGIOSGA001052	90	78	168	25	29	54	63	100	163	32	51	83	46	34	80
BGIOSGA001053	14	12	26	34	43	77	9	27	36	11	9	20	15	13	28
BGIOSGA001054	5487	12206	17693	3359	2494	5853	10308	11585	21893	3089	5306	8395	2815	2452	5267
BGIOSGA001055	502	707	1209	966	834	1800	871	895	1766	880	915	1795	993	954	1947
BGIOSGA001056	21	19	40	35	29	64	19	45	64	27	32	59	33	22	55
BGIOSGA001057	3014	2656	5670	5331	6762	12093	3838	3954	7792	5678	3774	9452	4254	4390	8644
BGIOSGA001058	0	0	0	2	0	2	0	0	0	0	0	0	0	0	0
BGIOSGA001059	14	7	21	76	63	139	2	31	33	164	184	348	296	273	569
BGIOSGA001060	1958	4545	6503	2385	1768	4153	7748	9898	17646	3241	4161	7402	4381	3746	8127
BGIOSGA001061	221	224	445	205	196	401	176	242	418	159	125	284	152	163	315
BGIOSGA001062	3193	3623	6816	5090	3871	8961	3683	4087	7770	4156	4541	8697	4686	3786	8472
BGIOSGA001063	222	90	312	90	117	207	103	133	236	73	93	166	56	49	105
BGIOSGA001064	186	381	567	402	221	623	347	406	753	414	404	818	462	437	899
BGIOSGA001065	88	102	190	24	14	38	30	27	57	25	16	41	3	11	14
BGIOSGA001066	2	3	5	12	2	14	1	4	5	2	2	4	0	2	2
BGIOSGA001067	6	5	11	1	2	3	10	9	19	2	1	3	0	2	2
BGIOSGA001068	0	0	0	0	0	0	0	0	0	0	0	0	0	0	0
BGIOSGA001069	95	111	206	203	178	381	107	128	235	311	213	524	151	131	282
BGIOSGA001070	1356	2441	3797	3447	2549	5996	1754	2068	3822	3319	2861	6180	3495	3536	7031
BGIOSGA001071	10	4	14	0	0	0	0	0	0	0	0	0	0	0	0
BGIOSGA001072	406	369	775	382	366	748	449	473	922	584	662	1246	675	555	1230
BGIOSGA001073	3245	2698	5943	3573	2941	6514	1765	1940	3705	3424	3997	7421	3021	3222	6243
BGIOSGA001074	1098	938	2036	1327	1465	2792	412	505	917	619	462	1081	562	516	1078
BGIOSGA001075	1	0	1	0	0	0	0	0	0	0	0	0	2	1	3
BGIOSGA001076	41	61	102	79	64	143	57	55	112	42	41	83	75	101	176
BGIOSGA001077	14	16	30	20	8	28	1	2	3	2	1	3	2	2	4
BGIOSGA001078	451	602	1053	227	142	369	471	515	986	372	287	659	241	205	446
BGIOSGA001079	1517	1115	2632	1421	1055	2476	1292	1406	2698	1583	1143	2726	1306	1357	2663
BGIOSGA001080	20	6	26	49	19	68	29	34	63	20	14	34	16	23	39
BGIOSGA001081	113	463	576	137	87	224	276	265	541	338	180	518	209	270	479
BGIOSGA001082	4	3	7	3	0	3	1	0	1	0	0	0	0	0	0
BGIOSGA001083	69	60	129	449	445	894	52	24	76	331	275	606	220	262	482
BGIOSGA001084	25	8	33	10	18	28	2	7	9	11	13	24	13	20	33
BGIOSGA001085	306	509	815	304	223	527	496	633	1129	421	468	889	1431	1128	2559
BGIOSGA001086	504	706	1210	1060	821	1881	599	687	1286	876	1020	1896	1663	1784	3447
BGIOSGA001087	1174	873	2047	1078	861	1939	800	925	1725	1263	1025	2288	1181	1019	2200
BGIOSGA001088	6395	10276	16671	7475	6527	14002	8958	9861	18819	8632	8631	17263	7020	6167	13187
BGIOSGA001089	8	0	8	0	0	0	0	0	0	0	0	0	0	0	0
BGIOSGA001090	181	107	288	309	241	550	163	173	336	315	255	570	439	489	928
BGIOSGA001091	0	0	0	0	0	0	0	0	0	4	4	8	0	0	0
BGIOSGA001092	1169	1387	2556	3288	2143	5431	1427	1947	3374	3307	3363	6670	2229	2293	4522
BGIOSGA001093	8	10	18	5	7	12	17	16	33	3	9	12	6	4	10
BGIOSGA001094	3	6	9	0	0	0	2	0	2	0	0	0	0	0	0
BGIOSGA001095	2376	2603	4979	3256	2209	5465	1863	2400	4263	3180	3162	6342	3134	3424	6558
BGIOSGA001096	0	0	0	0	0	0	0	0	0	2	0	2	2	3	5
BGIOSGA001097	4	2	6	8	0	8	0	10	10	4	0	4	4	2	6
BGIOSGA001098	0	0	0	0	2	2	0	0	0	0	2	2	0	0	0
BGIOSGA001099	17217	22736	39953	35482	24123	59605	18729	21215	39944	25051	28756	53807	21790	18508	40298
BGIOSGA001100	35	43	78	109	97	206	30	28	58	49	42	91	78	65	143
BGIOSGA001101	819	1017	1836	1353	890	2243	679	890	1569	960	1005	1965	1559	1525	3084
BGIOSGA001102	4614	4690	9304	6078	4975	11053	3984	4313	8297	5509	7012	12521	5091	4786	9877
BGIOSGA001103	0	0	0	6	0	6	0	7	7	0	0	0	0	1	1
BGIOSGA001104	0	0	0	0	0	0	0	0	0	1	0	1	0	0	0
BGIOSGA001105	39	24	63	11	6	17	43	39	82	49	60	109	66	69	135
BGIOSGA001106	0	0	0	0	0	0	0	0	0	2	0	2	0	1	1
BGIOSGA001107	18	5	23	105	32	137	0	2	2	23	27	50	40	43	83
BGIOSGA001108	3928	4090	8018	4129	3639	7768	5361	6074	11435	3772	4562	8334	3440	3460	6900
BGIOSGA001109	63	108	171	45	32	77	70	64	134	140	117	257	50	58	108
BGIOSGA001110	2229	1831	4060	1272	915	2187	2209	2370	4579	1077	1519	2596	1476	1168	2644
BGIOSGA001111	0	0	0	1	0	1	6	6	12	0	3	3	2	1	3
BGIOSGA001112	0	0	0	0	0	0	0	0	0	0	0	0	0	0	0
BGIOSGA001113	331	264	595	468	289	757	0	2	2	4	0	4	9	2	11
BGIOSGA001114	464	469	933	624	452	1076	2	2	4	0	2	2	2	1	3
BGIOSGA001115	0	0	0	0	0	0	0	0	0	0	0	0	0	0	0
BGIOSGA001116	58	48	106	152	109	261	316	407	723	388	410	798	506	487	993
BGIOSGA001117	1182	366	1548	802	596	1398	637	611	1248	619	658	1277	597	545	1142
BGIOSGA001118	49	25	74	68	53	121	13	25	38	25	23	48	48	33	81
BGIOSGA001119	2361	3635	5996	5232	4189	9421	2623	3702	6325	4964	5006	9970	5214	5034	10248
BGIOSGA001120	222	87	309	381	237	618	26	60	86	256	359	615	244	276	520
BGIOSGA001121	490	1611	2101	732	708	1440	656	899	1555	772	590	1362	1101	1378	2479
BGIOSGA001122	322	209	531	278	178	456	217	217	434	266	268	534	192	140	332
BGIOSGA001123	0	0	0	0	0	0	7	10	17	27	14	41	1	0	1
BGIOSGA001124	0	0	0	0	0	0	40	53	93	49	44	93	5	13	18
BGIOSGA001125	42	22	64	32	29	61	40	32	72	5	2	7	0	0	0
BGIOSGA001126	0	0	0	0	0	0	0	0	0	0	0	0	0	0	0
BGIOSGA001127	419	266	685	37	42	79	223	226	449	36	37	73	4	8	12
BGIOSGA001128	97	11	108	12	4	16	37	51	88	41	35	76	73	96	169
BGIOSGA001129	0	0	0	0	0	0	0	0	0	1	0	1	0	0	0
BGIOSGA001130	172	60	232	258	198	456	67	87	154	180	182	362	283	300	583
BGIOSGA001131	44	23	67	41	27	68	37	62	99	49	28	77	49	16	65
BGIOSGA001132	358	199	557	513	377	890	149	237	386	435	399	834	476	399	875
BGIOSGA001133	32	10	42	30	27	57	19	27	46	58	23	81	26	46	72
BGIOSGA001134	188	68	256	47	23	70	160	142	302	54	76	130	85	34	119
BGIOSGA001135	2	0	2	2	0	2	3	19	22	0	1	1	0	2	2
BGIOSGA001136	0	0	0	0	0	0	1	0	1	1	2	3	6	1	7
BGIOSGA001137	7292	11758	19050	712	848	1560	3936	3818	7754	990	1041	2031	843	776	1619
BGIOSGA001138	0	0	0	0	0	0	0	0	0	0	0	0	0	0	0
BGIOSGA001139	404	476	880	295	259	554	337	441	778	362	350	712	400	289	689
BGIOSGA001140	227	152	379	305	204	509	135	145	280	162	227	389	279	303	582
BGIOSGA001141	346	373	719	372	348	720	324	339	663	370	199	569	365	384	749
BGIOSGA001142	0	0	0	0	0	0	0	0	0	0	0	0	0	0	0
BGIOSGA001143	0	0	0	0	0	0	0	0	0	0	0	0	0	0	0
BGIOSGA001144	94	93	187	12	15	27	118	139	257	27	39	66	25	10	35
BGIOSGA001145	0	0	0	0	0	0	4	5	9	0	3	3	2	2	4
BGIOSGA001146	0	0	0	0	0	0	0	0	0	0	0	0	0	0	0
BGIOSGA001147	242	151	393	249	224	473	83	107	190	171	217	388	234	212	446
BGIOSGA001148	152	123	275	216	179	395	79	94	173	132	173	305	180	161	341
BGIOSGA001149	648	625	1273	546	445	991	275	299	574	292	336	628	178	258	436
BGIOSGA001150	665	361	1026	661	508	1169	259	356	615	483	527	1010	618	617	1235
BGIOSGA001151	427	204	631	39	52	91	146	201	347	29	13	42	14	7	21
BGIOSGA001152	10	1	11	9	10	19	2	2	4	0	0	0	0	2	2
BGIOSGA001153	0	0	0	0	0	0	0	0	0	0	0	0	0	0	0
BGIOSGA001154	0	0	0	0	0	0	0	0	0	0	0	0	0	0	0
BGIOSGA001155	0	0	0	1	2	3	2	4	6	2	2	4	0	0	0
BGIOSGA001156	0	3	3	0	2	2	0	2	2	0	0	0	0	0	0
BGIOSGA001157	0	0	0	2	1	3	0	0	0	0	0	0	0	0	0
BGIOSGA001158	21	32	53	75	106	181	28	25	53	28	17	45	42	60	102
BGIOSGA001159	11	22	33	46	60	106	29	39	68	34	43	77	7	6	13
BGIOSGA001160	873	479	1352	1721	790	2511	229	316	545	1132	1207	2339	863	1047	1910
BGIOSGA001161	639	766	1405	1493	705	2198	791	937	1728	1049	1106	2155	1261	1075	2336
BGIOSGA001162	832	1240	2072	281	196	477	414	458	872	500	489	989	395	371	766
BGIOSGA001163	9	0	9	12	17	29	1	3	4	5	10	15	22	12	34
BGIOSGA001164	0	0	0	0	0	0	0	0	0	0	0	0	0	0	0
BGIOSGA001165	7	8	15	11	0	11	20	18	38	4	5	9	5	10	15
BGIOSGA001166	0	0	0	0	0	0	0	0	0	0	0	0	0	0	0
BGIOSGA001167	0	1	1	0	0	0	2	1	3	0	0	0	1	0	1
BGIOSGA001168	32	42	74	45	33	78	62	80	142	29	35	64	22	14	36
BGIOSGA001169	3020	3378	6398	4579	3425	8004	3170	3711	6881	3314	3403	6717	3583	3577	7160
BGIOSGA001170	167	38	205	80	40	120	84	94	178	15	8	23	8	13	21
BGIOSGA001171	0	0	0	0	0	0	0	0	0	0	0	0	0	0	0
BGIOSGA001172	619	531	1150	1275	1028	2303	527	580	1107	1130	1038	2168	747	602	1349
BGIOSGA001173	728	511	1239	886	637	1523	501	473	974	564	647	1211	506	506	1012
BGIOSGA001174	1031	688	1719	1343	1177	2520	634	774	1408	1003	1021	2024	1044	1038	2082
BGIOSGA001175	459	641	1100	525	415	940	593	553	1146	385	334	719	294	332	626
BGIOSGA001176	0	1	1	0	0	0	0	0	0	0	0	0	0	0	0
BGIOSGA001177	0	0	0	0	1	1	0	0	0	0	0	0	0	0	0
BGIOSGA001178	3	6	9	28	10	38	1	8	9	16	11	27	14	8	22
BGIOSGA001179	3165	2337	5502	3225	2529	5754	2741	2822	5563	3172	3628	6800	2350	2075	4425
BGIOSGA001180	89	17	106	559	591	1150	33	53	86	183	318	501	213	201	414
BGIOSGA001181	182	138	320	39	51	90	143	192	335	102	39	141	58	57	115
BGIOSGA001182	162	122	284	63	35	98	127	115	242	37	44	81	15	18	33
BGIOSGA001183	2027	2649	4676	2856	2237	5093	1847	2137	3984	2637	2987	5624	2398	2027	4425
BGIOSGA001184	830	592	1422	507	368	875	398	455	853	429	518	947	399	358	757
BGIOSGA001185	1405	763	2168	841	566	1407	653	832	1485	778	1070	1848	873	822	1695
BGIOSGA001186	166	135	301	16	15	31	34	28	62	66	52	118	9	4	13
BGIOSGA001187	2104	1981	4085	2275	1944	4219	2096	2305	4401	2595	3476	6071	1745	2027	3772
BGIOSGA001188	202	181	383	49	49	98	106	128	234	60	98	158	39	42	81
BGIOSGA001189	0	0	0	0	0	0	0	0	0	0	0	0	0	0	0
BGIOSGA001190	83	45	128	4	21	25	4	9	13	25	29	54	5	6	11
BGIOSGA001191	1612	2140	3752	2468	1542	4010	1710	2181	3891	1730	1872	3602	2868	2503	5371
BGIOSGA001192	92	139	231	1	2	3	27	34	61	7	6	13	2	1	3
BGIOSGA001193	0	0	0	0	0	0	0	0	0	0	0	0	0	0	0
BGIOSGA001194	857	990	1847	1210	940	2150	680	763	1443	899	945	1844	1051	1033	2084
BGIOSGA001195	1117	1111	2228	1459	917	2376	880	1074	1954	1293	1425	2718	1486	1598	3084
BGIOSGA001196	73	44	117	48	28	76	36	61	97	32	32	64	20	20	40
BGIOSGA001197	5	1	6	17	1	18	2	1	3	0	0	0	0	0	0
BGIOSGA001198	448	209	657	41	53	94	209	146	355	35	45	80	26	24	50
BGIOSGA001199	56	48	104	22	12	34	19	41	60	37	41	78	49	65	114
BGIOSGA001200	146	61	207	619	380	999	80	118	198	409	480	889	453	437	890
BGIOSGA001201	114	60	174	177	118	295	88	114	202	140	173	313	260	234	494
BGIOSGA001202	3681	1467	5148	5492	4212	9704	1472	1604	3076	4625	5376	10001	4351	4422	8773
BGIOSGA001203	2422	2455	4877	6655	3763	10418	2401	3713	6114	4674	5329	10003	6516	5974	12490
BGIOSGA001204	1053	1330	2383	1263	1001	2264	1243	1688	2931	1470	1550	3020	1843	1743	3586
BGIOSGA001205	0	0	0	0	0	0	0	0	0	0	0	0	0	0	0
BGIOSGA001206	118	132	250	29	14	43	50	63	113	38	17	55	35	28	63
BGIOSGA001207	3142	1714	4856	2579	2265	4844	1985	2152	4137	1977	2770	4747	2084	1642	3726
BGIOSGA001208	942	920	1862	468	243	711	916	1027	1943	321	245	566	245	190	435
BGIOSGA001209	194	247	441	208	116	324	323	302	625	281	514	795	320	221	541
BGIOSGA001210	755	876	1631	921	659	1580	744	729	1473	1191	1159	2350	990	891	1881
BGIOSGA001211	521	388	909	901	450	1351	545	587	1132	791	763	1554	602	511	1113
BGIOSGA001212	0	0	0	0	0	0	0	0	0	0	0	0	0	0	0
BGIOSGA001213	2	5	7	1	1	2	14	10	24	8	6	14	15	8	23
BGIOSGA001214	294	74	368	93	77	170	99	66	165	40	43	83	42	26	68
BGIOSGA001215	5	9	14	0	0	0	10	1	11	2	0	2	0	0	0
BGIOSGA001216	6	11	17	0	0	0	0	0	0	4	0	4	0	0	0
BGIOSGA001217	0	0	0	0	0	0	0	0	0	0	0	0	0	0	0
BGIOSGA001218	1903	2305	4208	2842	1678	4520	2087	2421	4508	2864	3144	6008	2730	2829	5559
BGIOSGA001219	10	9	19	19	19	38	0	5	5	24	15	39	7	19	26
BGIOSGA001220	519	351	870	658	531	1189	355	429	784	545	593	1138	850	913	1763
BGIOSGA001221	209	94	303	344	176	520	82	108	190	195	213	408	245	263	508
BGIOSGA001222	8	0	8	0	2	2	2	2	4	7	4	11	2	6	8
BGIOSGA001223	198	141	339	173	118	291	191	238	429	129	153	282	246	218	464
BGIOSGA001224	466	229	695	424	332	756	255	314	569	317	344	661	289	301	590
BGIOSGA001225	1380	890	2270	2881	2018	4899	820	1175	1995	3141	2926	6067	2454	2568	5022
BGIOSGA001226	1727	1084	2811	1821	1617	3438	1235	1562	2797	1434	1667	3101	1367	1304	2671
BGIOSGA001227	1	0	1	0	0	0	1	2	3	0	0	0	2	0	2
BGIOSGA001228	0	0	0	0	0	0	0	0	0	0	0	0	0	0	0
BGIOSGA001229	910	82	992	227	124	351	567	589	1156	456	533	989	85	84	169
BGIOSGA001230	15	2	17	27	15	42	2	2	4	6	2	8	2	4	6
BGIOSGA001231	1	1	2	1	0	1	0	0	0	0	0	0	0	0	0
BGIOSGA001232	0	0	0	0	0	0	0	0	0	0	0	0	0	0	0
BGIOSGA001233	2430	222	2652	1481	1155	2636	1400	1319	2719	1295	1353	2648	481	520	1001
BGIOSGA001234	36	16	52	289	99	388	40	53	93	79	170	249	253	140	393
BGIOSGA001235	0	0	0	0	0	0	125	117	242	36	46	82	34	31	65
BGIOSGA001236	18	5	23	94	83	177	7	19	26	34	50	84	95	53	148
BGIOSGA001237	0	0	0	0	0	0	4	3	7	2	8	10	11	6	17
BGIOSGA001238	0	0	0	0	0	0	2	3	5	2	0	2	0	0	0
BGIOSGA001239	0	5	5	4	2	6	0	1	1	27	20	47	7	4	11
BGIOSGA001240	0	0	0	0	0	0	0	0	0	0	0	0	0	0	0
BGIOSGA001241	2818	4263	7081	3108	2715	5823	3431	4065	7496	2599	2921	5520	1848	2005	3853
BGIOSGA001242	40	52	92	69	59	128	8	23	31	8	3	11	15	11	26
BGIOSGA001243	23	5	28	172	127	299	10	8	18	71	76	147	56	52	108
BGIOSGA001244	3341	3561	6902	4761	3715	8476	3140	3818	6958	5051	4753	9804	5816	5937	11753
BGIOSGA001245	0	0	0	0	0	0	2	6	8	14	6	20	13	14	27
BGIOSGA001246	2	0	2	0	0	0	0	1	1	0	0	0	0	0	0
BGIOSGA001247	0	0	0	0	0	0	0	0	0	0	0	0	0	4	4
BGIOSGA001248	0	0	0	0	0	0	0	0	0	0	0	0	0	0	0
BGIOSGA001249	43	63	106	45	49	94	43	68	111	42	25	67	41	55	96
BGIOSGA001250	74	117	191	83	57	140	80	114	194	82	92	174	47	83	130
BGIOSGA001251	0	0	0	0	0	0	0	0	0	0	0	0	0	0	0
BGIOSGA001252	0	0	0	0	0	0	0	0	0	0	0	0	0	0	0
BGIOSGA001253	0	0	0	0	0	0	0	0	0	0	0	0	0	2	2
BGIOSGA001254	605	565	1170	488	241	729	344	460	804	473	471	944	134	169	303
BGIOSGA001255	85	108	193	110	80	190	92	107	199	132	90	222	134	175	309
BGIOSGA001256	1051	577	1628	1144	758	1902	422	443	865	787	849	1636	621	659	1280
BGIOSGA001257	173	226	399	190	196	386	191	199	390	122	120	242	105	95	200
BGIOSGA001258	0	0	0	0	0	0	0	0	0	0	0	0	0	0	0
BGIOSGA001259	577	420	997	1313	389	1702	1217	1407	2624	1473	1607	3080	1977	1519	3496
BGIOSGA001260	7	3	10	8	0	8	0	1	1	2	3	5	1	0	1
BGIOSGA001261	0	0	0	0	0	0	0	0	0	0	0	0	0	0	0
BGIOSGA001262	0	0	0	0	0	0	2	1	3	0	1	1	0	0	0
BGIOSGA001263	0	0	0	0	0	0	3	7	10	1	1	2	0	0	0
BGIOSGA001264	0	9	9	0	0	0	13	18	31	0	0	0	0	0	0
BGIOSGA001265	73	20	93	41	24	65	31	17	48	6	4	10	2	4	6
BGIOSGA001266	59	45	104	26	19	45	60	79	139	12	6	18	2	2	4
BGIOSGA001267	9	1	10	1	4	5	0	1	1	0	0	0	1	0	1
BGIOSGA001268	0	0	0	0	0	0	58	77	135	87	102	189	93	105	198
BGIOSGA001269	718	817	1535	139	63	202	929	1001	1930	319	427	746	108	108	216
BGIOSGA001270	2	0	2	1	0	1	6	0	6	0	0	0	2	0	2
BGIOSGA001271	2	0	2	0	0	0	0	0	0	0	0	0	1	0	1
BGIOSGA001272	136	149	285	129	99	228	6	17	23	22	27	49	31	21	52
BGIOSGA001273	5	3	8	10	1	11	0	0	0	0	0	0	0	0	0
BGIOSGA001274	30	22	52	4	3	7	0	0	0	0	0	0	0	0	0
BGIOSGA001275	56	20	76	51	28	79	0	0	0	0	2	2	0	0	0
BGIOSGA001276	0	2	2	6	3	9	1	1	2	0	0	0	1	0	1
BGIOSGA001277	29	73	102	245	161	406	241	308	549	799	966	1765	394	397	791
BGIOSGA001278	0	0	0	0	0	0	2	0	2	0	0	0	0	0	0
BGIOSGA001279	23	5	28	20	18	38	13	24	37	6	13	19	18	30	48
BGIOSGA001280	0	0	0	0	0	0	5	6	11	53	67	120	13	6	19
BGIOSGA001281	42	2	44	2	2	4	2	0	2	4	2	6	0	0	0
BGIOSGA001282	0	0	0	0	0	0	0	0	0	0	0	0	0	0	0
BGIOSGA001283	419	523	942	586	584	1170	821	856	1677	674	607	1281	582	549	1131
BGIOSGA001284	3386	2208	5594	3692	2297	5989	2677	3146	5823	3643	4066	7709	2634	2222	4856
BGIOSGA001285	0	0	0	0	0	0	0	0	0	0	0	0	0	0	0
BGIOSGA001286	972	1677	2649	1806	1111	2917	1	4	5	2	6	8	7	2	9
BGIOSGA001287	52	40	92	78	55	133	28	54	82	33	40	73	73	91	164
BGIOSGA001288	90	154	244	784	266	1050	220	430	650	1189	1086	2275	974	848	1822
BGIOSGA001289	0	0	0	0	0	0	0	0	0	0	0	0	0	0	0
BGIOSGA001290	0	0	0	0	0	0	0	0	0	0	0	0	0	0	0
BGIOSGA001291	0	0	0	0	0	0	0	2	2	0	0	0	0	0	0
BGIOSGA001292	0	0	0	0	0	0	0	0	0	2	0	2	0	0	0
BGIOSGA001293	0	0	0	0	0	0	0	0	0	0	0	0	0	0	0
BGIOSGA001294	80	22	102	2	2	4	6	5	11	3	1	4	0	2	2
BGIOSGA001295	35	40	75	160	152	312	91	92	183	152	66	218	115	114	229
BGIOSGA001296	0	0	0	0	0	0	0	0	0	0	0	0	0	0	0
BGIOSGA001297	589	325	914	960	728	1688	216	287	503	705	670	1375	732	681	1413
BGIOSGA001298	16	14	30	19	13	32	9	12	21	12	10	22	4	16	20
BGIOSGA001299	244	118	362	705	479	1184	169	232	401	791	881	1672	922	825	1747
BGIOSGA001300	11	15	26	94	100	194	7	3	10	21	30	51	37	30	67
BGIOSGA001301	0	0	0	0	0	0	0	0	0	0	0	0	0	0	0
BGIOSGA001302	2	0	2	4	1	5	0	0	0	8	3	11	5	4	9
BGIOSGA001303	0	0	0	0	0	0	0	0	0	0	0	0	0	0	0
BGIOSGA001304	0	0	0	0	0	0	0	0	0	0	0	0	0	0	0
BGIOSGA001305	2	3	5	0	0	0	0	0	0	0	0	0	0	0	0
BGIOSGA001306	35	24	59	93	51	144	17	26	43	69	68	137	69	80	149
BGIOSGA001307	78	35	113	173	81	254	20	32	52	72	62	134	64	81	145
BGIOSGA001308	597	348	945	905	569	1474	242	254	496	746	768	1514	742	631	1373
BGIOSGA001309	0	0	0	0	2	2	2	6	8	14	8	22	10	19	29
BGIOSGA001310	0	0	0	1	0	1	0	0	0	0	0	0	0	0	0
BGIOSGA001311	1180	1576	2756	1996	1424	3420	1611	1744	3355	2329	2477	4806	2689	2498	5187
BGIOSGA001312	48	26	74	50	55	105	21	25	46	38	43	81	57	46	103
BGIOSGA001313	288	264	552	121	65	186	145	158	303	131	130	261	184	124	308
BGIOSGA001314	325	188	513	82	49	131	232	285	517	66	120	186	39	42	81
BGIOSGA001315	2730	3436	6166	3072	1991	5063	2670	3830	6500	3550	3764	7314	3572	3372	6944
BGIOSGA001316	55	41	96	76	45	121	46	43	89	56	40	96	82	57	139
BGIOSGA001317	3371	2735	6106	2870	2600	5470	3150	3406	6556	3336	4489	7825	2626	2094	4720
BGIOSGA001318	87	228	315	82	53	135	60	88	148	46	33	79	48	30	78
BGIOSGA001319	0	0	0	0	0	0	0	0	0	0	0	0	2	0	2
BGIOSGA001320	32	64	96	13	10	23	29	14	43	10	10	20	8	12	20
BGIOSGA001321	14	12	26	4	0	4	29	48	77	16	22	38	17	13	30
BGIOSGA001322	609	444	1053	696	512	1208	143	248	391	257	263	520	269	249	518
BGIOSGA001323	5654	4504	10158	6374	5128	11502	5578	6546	12124	8595	9038	17633	7303	6880	14183
BGIOSGA001324	0	0	0	1	0	1	0	1	1	0	0	0	0	0	0
BGIOSGA001325	277	152	429	173	106	279	206	174	380	100	196	296	53	37	90
BGIOSGA001326	60	18	78	43	26	69	36	31	67	108	88	196	20	25	45
BGIOSGA001327	2	6	8	3	1	4	4	2	6	2	0	2	0	0	0
BGIOSGA001328	1797	3999	5796	2808	2243	5051	1919	2340	4259	2192	2504	4696	3010	2821	5831
BGIOSGA001329	0	0	0	0	0	0	0	0	0	0	0	0	0	0	0
BGIOSGA001330	0	0	0	0	0	0	0	0	0	0	0	0	0	0	0
BGIOSGA001331	0	0	0	0	0	0	0	0	0	0	0	0	0	0	0
BGIOSGA001332	2	0	2	0	2	2	0	0	0	0	0	0	1	5	6
BGIOSGA001333	94	285	379	49	25	74	319	282	601	194	206	400	109	111	220
BGIOSGA001334	921	1082	2003	2072	1614	3686	1080	1218	2298	1395	2087	3482	3602	2180	5782
BGIOSGA001335	0	2	2	0	0	0	0	2	2	0	0	0	0	0	0
BGIOSGA001336	0	1	1	0	0	0	0	0	0	0	0	0	0	0	0
BGIOSGA001337	79	40	119	79	56	135	19	19	38	29	53	82	34	22	56
BGIOSGA001338	473	321	794	834	487	1321	343	470	813	793	808	1601	866	814	1680
BGIOSGA001339	0	0	0	0	0	0	0	0	0	0	0	0	0	0	0
BGIOSGA001340	687	874	1561	1341	753	2094	974	1046	2020	1465	1312	2777	1259	1274	2533
BGIOSGA001341	0	1	1	0	0	0	0	3	3	1	3	4	5	0	5
BGIOSGA001342	2	6	8	0	0	0	2	2	4	2	2	4	12	2	14
BGIOSGA001343	251	210	461	232	166	398	181	229	410	233	248	481	212	210	422
BGIOSGA001344	14	2	16	0	0	0	12	30	42	0	2	2	0	0	0
BGIOSGA001345	0	0	0	0	0	0	0	0	0	0	0	0	0	0	0
BGIOSGA001346	280	336	616	422	209	631	434	445	879	323	235	558	179	212	391
BGIOSGA001347	766	1620	2386	1134	781	1915	645	682	1327	512	321	833	263	316	579
BGIOSGA001348	0	1	1	0	3	3	0	1	1	0	0	0	0	0	0
BGIOSGA001349	61	58	119	307	343	650	39	23	62	84	27	111	63	42	105
BGIOSGA001350	32	43	75	29	31	60	4	5	9	5	1	6	5	1	6
BGIOSGA001351	232	144	376	225	171	396	142	160	302	185	188	373	261	254	515
BGIOSGA001352	895	817	1712	548	440	988	260	322	582	303	326	629	479	406	885
BGIOSGA001353	0	2	2	0	0	0	111	145	256	96	79	175	149	157	306
BGIOSGA001354	2	4	6	2	0	2	0	1	1	1	3	4	4	4	8
BGIOSGA001355	2	3	5	6	2	8	0	0	0	3	0	3	1	0	1
BGIOSGA001356	0	0	0	0	0	0	0	0	0	1	0	1	2	0	2
BGIOSGA001357	99	66	165	61	54	115	44	75	119	64	53	117	92	86	178
BGIOSGA001358	191	207	398	325	211	536	137	193	330	221	227	448	322	345	667
BGIOSGA001359	859	1087	1946	530	439	969	669	999	1668	814	836	1650	739	714	1453
BGIOSGA001360	2	5	7	1	0	1	1	0	1	0	0	0	1	1	2
BGIOSGA001361	0	0	0	0	0	0	0	0	0	0	0	0	0	0	0
BGIOSGA001362	0	0	0	1	2	3	0	0	0	0	2	2	2	0	2
BGIOSGA001363	2431	1799	4230	4104	2891	6995	1702	1999	3701	3717	4217	7934	4131	3609	7740
BGIOSGA001364	905	1181	2086	1055	966	2021	1415	1589	3004	1090	1462	2552	1170	971	2141
BGIOSGA001365	611	914	1525	750	488	1238	486	610	1096	927	1018	1945	945	729	1674
BGIOSGA001366	684	514	1198	828	641	1469	615	786	1401	802	818	1620	927	868	1795
BGIOSGA001367	0	0	0	0	0	0	0	0	0	0	0	0	0	0	0
BGIOSGA001368	0	1	1	0	0	0	0	0	0	0	0	0	0	0	0
BGIOSGA001369	0	0	0	0	0	0	0	0	0	0	0	0	0	2	2
BGIOSGA001370	570	389	959	803	586	1389	249	382	631	668	712	1380	841	796	1637
BGIOSGA001371	0	0	0	0	0	0	0	0	0	0	0	0	0	0	0
BGIOSGA001372	0	1	1	0	0	0	348	353	701	310	315	625	339	236	575
BGIOSGA001373	20	54	74	15	13	28	0	0	0	0	0	0	2	0	2
BGIOSGA001374	829	1285	2114	646	574	1220	1841	1718	3559	1118	1628	2746	1843	1078	2921
BGIOSGA001375	37	81	118	280	236	516	945	1029	1974	1096	1349	2445	952	849	1801
BGIOSGA001376	541	1099	1640	1559	1501	3060	422	368	790	524	632	1156	392	375	767
BGIOSGA001377	0	0	0	0	0	0	0	0	0	0	0	0	0	0	0
BGIOSGA001378	0	0	0	0	0	0	0	0	0	0	0	0	0	0	0
BGIOSGA001379	0	0	0	0	0	0	0	0	0	0	0	0	0	0	0
BGIOSGA001380	0	0	0	0	0	0	0	0	0	0	0	0	0	0	0
BGIOSGA001381	0	0	0	0	0	0	0	0	0	0	0	0	0	0	0
BGIOSGA001382	0	0	0	0	0	0	2	0	2	0	0	0	0	0	0
BGIOSGA001383	0	0	0	0	0	0	0	0	0	0	0	0	0	0	0
BGIOSGA001384	0	0	0	0	0	0	0	0	0	0	0	0	0	0	0
BGIOSGA001385	0	0	0	2	0	2	0	0	0	0	0	0	0	0	0
BGIOSGA001386	45	2	47	1	2	3	0	0	0	0	0	0	0	0	0
BGIOSGA001387	75	239	314	98	44	142	147	99	246	28	50	78	33	11	44
BGIOSGA001388	14710	17946	32656	20134	16858	36992	16474	19830	36304	17595	16836	34431	20138	20332	40470
BGIOSGA001389	91	248	339	78	29	107	35	52	87	37	34	71	28	52	80
BGIOSGA001390	36	2	38	0	0	0	0	0	0	0	0	0	0	0	0
BGIOSGA001391	2	0	2	0	0	0	0	0	0	1	0	1	0	0	0
BGIOSGA001392	4	3	7	0	0	0	0	0	0	0	0	0	0	0	0
BGIOSGA001393	0	0	0	0	0	0	0	0	0	0	0	0	0	0	0
BGIOSGA001394	0	0	0	1	0	1	0	0	0	0	0	0	0	0	0
BGIOSGA001395	0	0	0	0	0	0	0	0	0	0	0	0	2	1	3
BGIOSGA001396	0	0	0	0	0	0	1	0	1	0	1	1	0	0	0
BGIOSGA001397	1255	2791	4046	1903	1352	3255	1904	2158	4062	2563	2626	5189	2216	2254	4470
BGIOSGA001398	3	1	4	4	2	6	2	1	3	3	0	3	4	2	6
BGIOSGA001399	481	409	890	643	478	1121	467	741	1208	381	478	859	425	522	947
BGIOSGA001400	1159	767	1926	1408	876	2284	895	1042	1937	1131	1243	2374	962	991	1953
BGIOSGA001401	1	3	4	0	0	0	1	0	1	0	1	1	0	0	0
BGIOSGA001402	0	0	0	0	0	0	0	0	0	0	0	0	0	0	0
BGIOSGA001403	0	0	0	0	0	0	0	0	0	0	0	0	0	0	0
BGIOSGA001404	0	0	0	0	0	0	0	0	0	0	0	0	0	0	0
BGIOSGA001405	0	0	0	0	0	0	2	0	2	0	0	0	0	0	0
BGIOSGA001406	0	2	2	0	0	0	0	0	0	0	0	0	0	0	0
BGIOSGA001407	0	0	0	0	0	0	0	0	0	0	0	0	0	1	1
BGIOSGA001408	2	2	4	3	2	5	0	0	0	6	10	16	2	4	6
BGIOSGA001409	0	2	2	1	0	1	6	3	9	6	0	6	2	6	8
BGIOSGA001410	0	0	0	0	0	0	0	0	0	0	0	0	0	0	0
BGIOSGA001411	0	0	0	0	0	0	0	0	0	0	0	0	0	0	0
BGIOSGA001412	690	893	1583	774	435	1209	1347	1293	2640	796	1012	1808	857	742	1599
BGIOSGA001413	2779	6517	9296	6742	4492	11234	4540	5070	9610	6711	7245	13956	6038	5578	11616
BGIOSGA001414	196	211	407	303	277	580	210	223	433	226	240	466	205	238	443
BGIOSGA001415	0	0	0	0	0	0	0	1	1	0	1	1	0	0	0
BGIOSGA001416	137	88	225	54	61	115	39	62	101	45	66	111	84	87	171
BGIOSGA001417	3087	3660	6747	3988	2852	6840	4522	4561	9083	4320	4300	8620	3622	3423	7045
BGIOSGA001418	0	0	0	0	0	0	0	0	0	0	0	0	0	0	0
BGIOSGA001419	864	653	1517	1547	970	2517	747	992	1739	1154	1400	2554	1416	1331	2747
BGIOSGA001420	3	0	3	11	14	25	4	0	4	1	5	6	26	7	33
BGIOSGA001421	0	0	0	0	0	0	0	0	0	0	0	0	0	0	0
BGIOSGA001422	1224	479	1703	345	264	609	1060	1066	2126	437	409	846	374	341	715
BGIOSGA001423	14	18	32	0	0	0	32	27	59	8	8	16	1	3	4
BGIOSGA001424	91	129	220	77	70	147	250	325	575	241	203	444	59	61	120
BGIOSGA001425	0	0	0	0	0	0	13	23	36	25	21	46	1	10	11
BGIOSGA001426	139	181	320	101	68	169	199	207	406	145	158	303	196	168	364
BGIOSGA001427	121	151	272	288	153	441	359	325	684	233	250	483	287	277	564
BGIOSGA001428	73	71	144	96	89	185	126	136	262	167	153	320	125	113	238
BGIOSGA001429	805	958	1763	893	721	1614	916	961	1877	741	790	1531	680	619	1299
BGIOSGA001430	151	210	361	80	55	135	200	162	362	101	133	234	113	109	222
BGIOSGA001431	154	148	302	613	462	1075	185	216	401	647	650	1297	457	438	895
BGIOSGA001432	18	28	46	113	81	194	28	19	47	107	66	173	84	110	194
BGIOSGA001433	1686	1110	2796	2176	1489	3665	911	979	1890	2051	2442	4493	2002	2079	4081
BGIOSGA001434	0	0	0	0	0	0	0	0	0	0	0	0	0	0	0
BGIOSGA001435	0	0	0	0	0	0	0	0	0	0	0	0	0	0	0
BGIOSGA001436	0	0	0	0	0	0	0	0	0	0	0	0	0	0	0
BGIOSGA001437	19	37	56	180	89	269	6	19	25	140	115	255	29	33	62
BGIOSGA001438	0	0	0	0	0	0	0	0	0	0	0	0	0	0	0
BGIOSGA001439	7318	6334	13652	4254	4010	8264	7678	6660	14338	4779	5478	10257	3883	3471	7354
BGIOSGA001440	2358	1775	4133	3911	2525	6436	1799	2373	4172	3082	3631	6713	3277	2706	5983
BGIOSGA001441	581	900	1481	860	570	1430	598	754	1352	931	842	1773	874	876	1750
BGIOSGA001442	966	641	1607	1856	1400	3256	463	627	1090	1074	1157	2231	1547	1420	2967
BGIOSGA001443	0	0	0	0	0	0	0	0	0	0	0	0	0	0	0
BGIOSGA001444	162	150	312	668	532	1200	208	204	412	1244	965	2209	861	899	1760
BGIOSGA001445	0	0	0	0	0	0	0	0	0	0	0	0	0	0	0
BGIOSGA001446	0	0	0	0	0	0	0	0	0	0	0	0	0	0	0
BGIOSGA001447	5	0	5	0	1	1	0	0	0	0	0	0	0	0	0
BGIOSGA001448	12	2	14	74	43	117	17	8	25	62	75	137	142	85	227
BGIOSGA001449	60	37	97	47	60	107	21	27	48	28	26	54	52	34	86
BGIOSGA001450	459	270	729	405	367	772	251	287	538	459	527	986	695	558	1253
BGIOSGA001451	371	366	737	380	316	696	330	359	689	369	374	743	229	246	475
BGIOSGA001452	671	614	1285	295	269	564	678	753	1431	338	334	672	281	303	584
BGIOSGA001453	153	125	278	304	212	516	160	243	403	234	201	435	288	316	604
BGIOSGA001454	107	346	453	976	1034	2010	636	718	1354	1552	1732	3284	1645	1728	3373
BGIOSGA001455	6	49	55	0	2	2	2	18	20	0	0	0	0	0	0
BGIOSGA001456	0	0	0	0	0	0	2	9	11	0	0	0	0	0	0
BGIOSGA001457	0	0	0	0	0	0	0	0	0	0	0	0	0	0	0
BGIOSGA001458	0	0	0	0	0	0	0	0	0	0	0	0	0	0	0
BGIOSGA001459	0	0	0	0	0	0	0	0	0	0	0	0	0	0	0
BGIOSGA001460	0	0	0	0	0	0	41	37	78	5	11	16	0	0	0
BGIOSGA001461	141	248	389	4	4	8	55	75	130	13	14	27	0	0	0
BGIOSGA001462	155	90	245	146	122	268	74	121	195	145	156	301	210	206	416
BGIOSGA001463	39	33	72	52	37	89	17	36	53	36	67	103	71	59	130
BGIOSGA001464	23	19	42	43	30	73	15	11	26	12	19	31	22	21	43
BGIOSGA001465	0	0	0	0	0	0	0	0	0	0	0	0	1	0	1
BGIOSGA001466	28	32	60	28	19	47	61	52	113	15	18	33	38	33	71
BGIOSGA001467	529	431	960	1538	1165	2703	414	468	882	1294	1418	2712	1253	1131	2384
BGIOSGA001468	50	108	158	4	16	20	49	75	124	19	14	33	16	6	22
BGIOSGA001469	93	180	273	164	107	271	194	199	393	276	228	504	231	209	440
BGIOSGA001470	0	0	0	0	0	0	91	116	207	326	339	665	284	310	594
BGIOSGA001471	0	0	0	0	0	0	0	0	0	0	0	0	0	0	0
BGIOSGA001472	0	0	0	0	0	0	9	11	20	31	28	59	6	13	19
BGIOSGA001473	0	0	0	0	0	0	0	0	0	0	0	0	0	0	0
BGIOSGA001474	0	0	0	0	0	0	0	0	0	0	0	0	0	0	0
BGIOSGA001475	12	8	20	1	1	2	11	6	17	10	3	13	23	15	38
BGIOSGA001476	415	311	726	609	438	1047	376	354	730	612	488	1100	487	452	939
BGIOSGA001477	618	512	1130	550	488	1038	399	456	855	526	550	1076	632	815	1447
BGIOSGA001478	0	0	0	0	0	0	0	0	0	0	0	0	0	0	0
BGIOSGA001479	4	2	6	2	0	2	4	9	13	0	0	0	2	0	2
BGIOSGA001480	6524	3895	10419	4558	3871	8429	6343	6588	12931	4733	5739	10472	3558	3015	6573
BGIOSGA001481	0	3	3	0	0	0	0	0	0	1	0	1	0	0	0
BGIOSGA001482	0	0	0	0	0	0	0	0	0	0	0	0	0	0	0
BGIOSGA001483	0	0	0	0	0	0	0	0	0	0	0	0	0	0	0
BGIOSGA001484	0	0	0	3	0	3	0	0	0	1	1	2	0	0	0
BGIOSGA001485	0	0	0	0	0	0	1	1	2	0	0	0	2	1	3
BGIOSGA001486	0	0	0	0	0	0	0	0	0	0	0	0	0	0	0
BGIOSGA001487	756	556	1312	577	469	1046	222	351	573	509	755	1264	424	350	774
BGIOSGA001488	0	0	0	0	0	0	0	0	0	0	0	0	0	0	0
BGIOSGA001489	0	0	0	0	0	0	0	0	0	0	0	0	1	0	1
BGIOSGA001490	6	0	6	7	1	8	0	1	1	5	9	14	1	3	4
BGIOSGA001491	16	14	30	27	19	46	6	7	13	21	21	42	13	12	25
BGIOSGA001492	472	225	697	568	485	1053	74	99	173	525	646	1171	196	246	442
BGIOSGA001493	266	246	512	330	247	577	176	183	359	291	318	609	201	182	383
BGIOSGA001494	16	5	21	38	17	55	8	0	8	15	14	29	6	2	8
BGIOSGA001495	1909	1412	3321	3033	1896	4929	1043	1321	2364	2771	3081	5852	3396	3387	6783
BGIOSGA001496	94	134	228	91	65	156	104	119	223	95	89	184	117	143	260
BGIOSGA001497	13	6	19	20	7	27	1	13	14	9	14	23	14	11	25
BGIOSGA001498	188	149	337	351	244	595	113	109	222	214	264	478	271	306	577
BGIOSGA001499	97	79	176	173	125	298	156	187	343	280	244	524	200	229	429
BGIOSGA001500	1	3	4	6	11	17	10	7	17	5	3	8	6	7	13
BGIOSGA001501	0	2	2	0	6	6	0	0	0	4	2	6	0	0	0
BGIOSGA001502	11	2	13	10	13	23	2	2	4	4	3	7	0	2	2
BGIOSGA001503	2419	2846	5265	2404	1954	4358	1696	1998	3694	2229	2497	4726	1789	1609	3398
BGIOSGA001504	469	458	927	174	152	326	394	519	913	197	228	425	307	254	561
BGIOSGA001505	0	0	0	0	0	0	0	0	0	0	0	0	0	0	0
BGIOSGA001506	1493	765	2258	1696	669	2365	387	482	869	1026	1137	2163	401	482	883
BGIOSGA001507	0	0	0	0	0	0	0	0	0	0	0	0	0	0	0
BGIOSGA001508	0	0	0	0	0	0	0	0	0	0	0	0	0	0	0
BGIOSGA001509	0	0	0	0	0	0	0	0	0	0	0	0	0	0	0
BGIOSGA001510	109	79	188	0	47	47	3	61	64	4	7	11	31	80	111
BGIOSGA001511	0	0	0	0	0	0	0	0	0	0	0	0	0	0	0
BGIOSGA001512	0	9	9	0	0	0	0	0	0	0	0	0	0	0	0
BGIOSGA001513	44	31	75	21	18	39	0	0	0	0	0	0	0	0	0
BGIOSGA001514	0	0	0	0	0	0	0	0	0	0	0	0	0	0	0
BGIOSGA001515	747	557	1304	370	327	697	0	0	0	0	4	4	0	0	0
BGIOSGA001516	38	26	64	84	63	147	54	50	104	62	73	135	40	23	63
BGIOSGA001517	46	56	102	84	67	151	99	105	204	54	75	129	106	63	169
BGIOSGA001518	0	0	0	0	0	0	0	0	0	1	0	1	0	0	0
BGIOSGA001519	42	73	115	92	48	140	139	162	301	105	114	219	116	147	263
BGIOSGA001520	0	3	3	0	6	6	2	2	4	7	9	16	8	12	20
BGIOSGA001521	964	743	1707	686	385	1071	670	712	1382	522	593	1115	454	453	907
BGIOSGA001522	149	100	249	109	105	214	71	121	192	101	78	179	108	69	177
BGIOSGA001523	0	2	2	0	0	0	0	0	0	0	0	0	0	0	0
BGIOSGA001524	2	0	2	0	6	6	0	0	0	2	6	8	3	0	3
BGIOSGA001525	4	12	16	0	0	0	2	0	2	0	0	0	0	0	0
BGIOSGA001526	0	0	0	0	0	0	0	0	0	1	0	1	0	0	0
BGIOSGA001527	0	0	0	0	0	0	0	0	0	0	0	0	0	2	2
BGIOSGA001528	0	2	2	4	3	7	2	2	4	0	1	1	0	2	2
BGIOSGA001529	0	0	0	1	0	1	0	0	0	0	0	0	1	1	2
BGIOSGA001530	0	0	0	0	0	0	0	0	0	0	0	0	0	0	0
BGIOSGA001531	0	0	0	0	0	0	0	0	0	0	0	0	0	0	0
BGIOSGA001532	0	0	0	0	0	0	0	0	0	0	0	0	0	0	0
BGIOSGA001533	184	121	305	270	168	438	162	178	340	181	236	417	323	246	569
BGIOSGA001534	0	0	0	0	0	0	0	0	0	2	1	3	0	0	0
BGIOSGA001535	116	89	205	102	72	174	43	62	105	78	73	151	117	125	242
BGIOSGA001536	1799	2525	4324	2090	1438	3528	2402	2730	5132	1856	1870	3726	3197	2812	6009
BGIOSGA001537	533	342	875	1626	1087	2713	345	378	723	1072	1173	2245	1330	1149	2479
BGIOSGA001538	778	717	1495	921	789	1710	783	897	1680	836	756	1592	1007	869	1876
BGIOSGA001539	504	382	886	456	358	814	330	375	705	481	516	997	443	413	856
BGIOSGA001540	1147	1653	2800	1345	997	2342	1352	1443	2795	1417	1671	3088	1366	1377	2743
BGIOSGA001541	64	74	138	64	55	119	91	123	214	59	63	122	96	58	154
BGIOSGA001542	109	116	225	40	35	75	19	18	37	1	6	7	0	2	2
BGIOSGA001543	1255	970	2225	1542	1412	2954	995	1167	2162	1425	1574	2999	1727	1544	3271
BGIOSGA001544	903	777	1680	1369	921	2290	888	1158	2046	1300	1405	2705	1481	1385	2866
BGIOSGA001545	144	293	437	265	346	611	397	355	752	316	270	586	377	352	729
BGIOSGA001546	193	2484	2677	4684	3298	7982	1870	1909	3779	3772	3884	7656	4566	3562	8128
BGIOSGA001547	1583	1422	3005	1797	1430	3227	1052	1304	2356	1572	1675	3247	1516	1534	3050
BGIOSGA001548	855	1200	2055	210	141	351	229	221	450	324	506	830	381	362	743
BGIOSGA001549	160	136	296	25	20	45	160	198	358	131	94	225	60	41	101
BGIOSGA001550	0	0	0	0	0	0	0	0	0	0	0	0	0	0	0
BGIOSGA001551	4	2	6	0	0	0	0	0	0	0	0	0	0	0	0
BGIOSGA001552	15	31	46	45	56	101	53	60	113	59	36	95	58	63	121
BGIOSGA001553	0	0	0	0	0	0	0	0	0	0	0	0	0	0	0
BGIOSGA001554	5	5	10	0	0	0	0	3	3	0	4	4	1	10	11
BGIOSGA001555	0	0	0	0	0	0	1	0	1	0	0	0	0	0	0
BGIOSGA001556	6	12	18	0	0	0	5	8	13	2	0	2	2	0	2
BGIOSGA001557	464	894	1358	84	34	118	84	63	147	40	60	100	16	14	30
BGIOSGA001558	434	647	1081	684	495	1179	449	592	1041	579	582	1161	1021	794	1815
BGIOSGA001559	0	0	0	0	0	0	0	0	0	0	0	0	0	0	0
BGIOSGA001560	23	23	46	4	7	11	2	1	3	3	4	7	0	0	0
BGIOSGA001561	0	0	0	0	0	0	0	0	0	0	0	0	0	1	1
BGIOSGA001562	277	221	498	522	288	810	214	242	456	312	320	632	319	341	660
BGIOSGA001563	45	46	91	67	39	106	39	42	81	31	51	82	41	49	90
BGIOSGA001564	326	217	543	1093	773	1866	111	136	247	553	536	1089	353	405	758
BGIOSGA001565	0	0	0	0	0	0	0	0	0	0	0	0	0	0	0
BGIOSGA001566	92	292	384	245	149	394	134	200	334	151	144	295	213	179	392
BGIOSGA001567	231	444	675	114	119	233	182	167	349	73	65	138	127	175	302
BGIOSGA001568	22	13	35	42	27	69	22	39	61	33	38	71	75	63	138
BGIOSGA001569	704	865	1569	331	258	589	422	449	871	408	317	725	282	355	637
BGIOSGA001570	0	0	0	0	0	0	0	0	0	0	0	0	0	0	0
BGIOSGA001571	0	0	0	0	0	0	0	0	0	0	0	0	0	0	0
BGIOSGA001572	129	76	205	98	97	195	110	136	246	97	97	194	88	91	179
BGIOSGA001573	1037	1202	2239	1527	1079	2606	1209	1382	2591	1718	1747	3465	1524	1585	3109
BGIOSGA001574	2	3	5	1	0	1	3	0	3	4	2	6	3	0	3
BGIOSGA001575	0	0	0	0	0	0	0	0	0	0	0	0	0	0	0
BGIOSGA001576	334	345	679	1355	1581	2936	1303	1480	2783	2455	2209	4664	2179	2282	4461
BGIOSGA001577	0	0	0	1	4	5	5	2	7	6	6	12	2	5	7
BGIOSGA001578	109	75	184	163	302	465	110	158	268	211	61	272	218	478	696
BGIOSGA001579	50	25	75	69	66	135	11	14	25	23	54	77	37	43	80
BGIOSGA001580	452	338	790	375	301	676	304	376	680	389	350	739	307	350	657
BGIOSGA001581	7	4	11	5	4	9	0	2	2	1	2	3	8	3	11
BGIOSGA001582	31	10	41	9	18	27	2	8	10	6	6	12	6	13	19
BGIOSGA001583	0	0	0	0	0	0	0	0	0	0	0	0	0	0	0
BGIOSGA001584	74	35	109	116	77	193	21	28	49	396	254	650	44	53	97
BGIOSGA001585	240	420	660	89	102	191	358	360	718	132	174	306	144	151	295
BGIOSGA001586	0	0	0	0	0	0	0	0	0	0	0	0	0	0	0
BGIOSGA001587	48	30	78	5	2	7	55	75	130	41	30	71	37	41	78
BGIOSGA001588	0	0	0	0	0	0	0	0	0	0	0	0	0	0	0
BGIOSGA001589	0	0	0	0	0	0	0	0	0	0	0	0	0	0	0
BGIOSGA001590	99	92	191	172	149	321	90	100	190	173	210	383	255	243	498
BGIOSGA001591	0	0	0	0	1	1	0	0	0	0	0	0	0	0	0
BGIOSGA001592	0	0	0	0	0	0	0	0	0	0	0	0	0	0	0
BGIOSGA001593	28	22	50	43	33	76	12	25	37	43	59	102	21	20	41
BGIOSGA001594	0	19	19	0	0	0	0	2	2	0	0	0	0	0	0
BGIOSGA001595	1	4	5	0	0	0	0	2	2	2	0	2	0	2	2
BGIOSGA001596	0	0	0	0	0	0	0	0	0	0	0	0	0	0	0
BGIOSGA001597	0	0	0	0	0	0	0	0	0	0	0	0	0	0	0
BGIOSGA001598	0	0	0	0	0	0	0	0	0	0	0	0	0	0	0
BGIOSGA001599	0	0	0	0	0	0	0	0	0	0	0	0	0	0	0
BGIOSGA001600	0	0	0	0	0	0	0	0	0	0	0	0	0	0	0
BGIOSGA001601	4	4	8	0	0	0	0	0	0	0	0	0	0	0	0
BGIOSGA001602	0	0	0	0	0	0	0	0	0	0	0	0	0	0	0
BGIOSGA001603	60	119	179	11	6	17	27	44	71	14	19	33	21	23	44
BGIOSGA001604	0	0	0	0	0	0	0	0	0	0	0	0	0	0	0
BGIOSGA001605	0	0	0	0	0	0	0	0	0	0	0	0	0	0	0
BGIOSGA001606	0	0	0	0	0	0	0	0	0	0	0	0	0	0	0
BGIOSGA001607	0	0	0	2	2	4	0	0	0	0	0	0	0	0	0
BGIOSGA001608	307	1140	1447	201	185	386	220	192	412	277	499	776	87	39	126
BGIOSGA001609	923	802	1725	1235	757	1992	996	1030	2026	1140	1193	2333	1326	1126	2452
BGIOSGA001610	24	42	66	123	61	184	27	32	59	79	76	155	69	133	202
BGIOSGA001611	1130	631	1761	624	404	1028	306	303	609	277	315	592	272	242	514
BGIOSGA001612	0	0	0	0	0	0	0	0	0	0	0	0	0	0	0
BGIOSGA001613	0	0	0	0	1	1	0	0	0	1	0	1	0	0	0
BGIOSGA001614	1261	998	2259	1163	909	2072	873	1004	1877	1072	1182	2254	1406	1455	2861
BGIOSGA001615	1582	973	2555	5501	3135	8636	1025	1396	2421	3779	4065	7844	4792	4738	9530
BGIOSGA001616	0	0	0	0	0	0	0	0	0	0	0	0	0	0	0
BGIOSGA001617	0	0	0	0	0	0	0	0	0	0	0	0	0	0	0
BGIOSGA001618	36	18	54	57	21	78	19	15	34	20	42	62	39	36	75
BGIOSGA001619	0	0	0	4	2	6	0	0	0	4	0	4	3	0	3
BGIOSGA001620	2507	1016	3523	5088	3346	8434	1204	1674	2878	3655	4339	7994	3208	2675	5883
BGIOSGA001621	14	0	14	0	0	0	2	2	4	1	0	1	0	0	0
BGIOSGA001622	26	22	48	36	30	66	16	14	30	25	28	53	27	20	47
BGIOSGA001623	0	0	0	0	0	0	85	107	192	0	1	1	0	0	0
BGIOSGA001624	1	0	1	0	0	0	0	0	0	0	0	0	0	0	0
BGIOSGA001625	0	0	0	0	0	0	1	0	1	0	0	0	0	0	0
BGIOSGA001626	1751	985	2736	336	226	562	381	634	1015	59	104	163	21	21	42
BGIOSGA001627	923	954	1877	761	549	1310	1070	1280	2350	245	304	549	327	316	643
BGIOSGA001628	6	1	7	15	17	32	7	13	20	20	10	30	21	15	36
BGIOSGA001629	304	193	497	126	99	225	154	206	360	14	27	41	21	10	31
BGIOSGA001630	0	0	0	0	0	0	0	0	0	0	0	0	0	0	0
BGIOSGA001631	433	606	1039	256	167	423	620	631	1251	393	370	763	200	140	340
BGIOSGA001632	0	2	2	0	0	0	2	2	4	0	0	0	0	0	0
BGIOSGA001633	8812	6696	15508	10414	8515	18929	5394	5934	11328	10502	10380	20882	9081	9096	18177
BGIOSGA001634	0	0	0	0	0	0	0	0	0	0	0	0	0	0	0
BGIOSGA001635	0	0	0	0	0	0	0	0	0	0	0	0	0	0	0
BGIOSGA001636	1622	621	2243	2859	1581	4440	626	846	1472	1681	2064	3745	1987	1937	3924
BGIOSGA001637	109	225	334	47	61	108	61	55	116	33	43	76	46	25	71
BGIOSGA001638	19	29	48	58	25	83	22	37	59	41	55	96	32	44	76
BGIOSGA001639	839	800	1639	1087	690	1777	654	691	1345	911	1010	1921	912	806	1718
BGIOSGA001640	240	282	522	181	107	288	150	182	332	196	192	388	230	175	405
BGIOSGA001641	101	97	198	31	26	57	43	55	98	51	75	126	47	27	74
BGIOSGA001642	59	107	166	165	165	330	83	50	133	282	219	501	118	101	219
BGIOSGA001643	0	0	0	0	0	0	0	0	0	0	0	0	0	0	0
BGIOSGA001644	1	5	6	13	8	21	6	5	11	15	10	25	6	7	13
BGIOSGA001645	0	0	0	0	0	0	0	0	0	0	0	0	0	0	0
BGIOSGA001646	0	2	2	0	0	0	0	0	0	0	0	0	0	0	0
BGIOSGA001647	0	0	0	0	0	0	0	0	0	0	0	0	0	0	0
BGIOSGA001648	2	3	5	2	4	6	0	0	0	0	1	1	0	0	0
BGIOSGA001649	0	0	0	0	0	0	0	0	0	0	0	0	0	0	0
BGIOSGA001650	0	0	0	0	0	0	0	0	0	0	0	0	0	0	0
BGIOSGA001651	0	0	0	0	0	0	0	0	0	0	0	0	0	0	0
BGIOSGA001652	75	96	171	62	58	120	173	231	404	387	245	632	234	239	473
BGIOSGA001653	0	0	0	0	0	0	0	0	0	0	0	0	0	0	0
BGIOSGA001654	0	0	0	0	0	0	0	0	0	0	0	0	0	0	0
BGIOSGA001655	0	0	0	0	0	0	0	0	0	0	0	0	0	0	0
BGIOSGA001656	0	0	0	0	0	0	0	0	0	0	0	0	0	0	0
BGIOSGA001657	16	7	23	35	10	45	21	20	41	26	34	60	22	23	45
BGIOSGA001658	141	108	249	243	95	338	304	297	601	159	267	426	167	137	304
BGIOSGA001659	1	3	4	5	2	7	8	9	17	3	5	8	3	3	6
BGIOSGA001660	77	57	134	118	72	190	58	62	120	83	61	144	133	103	236
BGIOSGA001661	109	213	322	2	8	10	123	123	246	4	8	12	0	6	6
BGIOSGA001662	307	509	816	459	248	707	444	496	940	490	542	1032	580	549	1129
BGIOSGA001663	4508	3744	8252	2115	1423	3538	4841	5282	10123	2969	4521	7490	3262	2150	5412
BGIOSGA001664	3	4	7	2	0	2	2	2	4	7	5	12	6	12	18
BGIOSGA001665	0	0	0	0	0	0	2	5	7	4	7	11	5	3	8
BGIOSGA001666	0	0	0	0	0	0	0	0	0	0	0	0	0	0	0
BGIOSGA001667	0	0	0	0	0	0	56	51	107	1	16	17	7	0	7
BGIOSGA001668	17	6	23	10	4	14	0	0	0	0	0	0	0	0	0
BGIOSGA001669	14	14	28	4	2	6	0	4	4	0	1	1	2	0	2
BGIOSGA001670	0	1	1	0	2	2	0	2	2	0	1	1	0	0	0
BGIOSGA001671	203	247	450	77	65	142	78	85	163	105	142	247	152	106	258
BGIOSGA001672	0	1	1	0	0	0	2	0	2	0	0	0	0	0	0
BGIOSGA001673	132	318	450	105	61	166	154	182	336	103	158	261	65	26	91
BGIOSGA001674	1853	2277	4130	1722	1538	3260	3139	3271	6410	2569	2051	4620	1734	1467	3201
BGIOSGA001675	0	0	0	0	0	0	0	0	0	0	0	0	0	0	0
BGIOSGA001676	2	2	4	11	10	21	2	0	2	8	6	14	4	7	11
BGIOSGA001677	0	0	0	2	2	4	0	0	0	3	0	3	0	0	0
BGIOSGA001678	304	245	549	409	340	749	169	164	333	335	329	664	284	243	527
BGIOSGA001679	0	0	0	0	0	0	0	0	0	0	0	0	0	0	0
BGIOSGA001680	216	78	294	367	244	611	44	106	150	361	303	664	210	213	423
BGIOSGA001681	852	516	1368	1365	860	2225	540	607	1147	1128	1331	2459	997	826	1823
BGIOSGA001682	585	745	1330	894	536	1430	689	674	1363	911	984	1895	1013	1009	2022
BGIOSGA001683	0	1	1	3	2	5	2	1	3	6	3	9	3	2	5
BGIOSGA001684	0	0	0	0	0	0	0	0	0	0	0	0	0	1	1
BGIOSGA001685	126	102	228	311	164	475	178	156	334	271	276	547	235	245	480
BGIOSGA001686	100	98	198	133	99	232	96	109	205	109	114	223	107	94	201
BGIOSGA001687	96	85	181	190	113	303	63	84	147	158	184	342	161	166	327
BGIOSGA001688	0	0	0	0	0	0	0	1	1	0	2	2	1	0	1
BGIOSGA001689	357	187	544	225	147	372	44	46	90	57	39	96	69	50	119
BGIOSGA001690	0	0	0	0	0	0	0	0	0	0	0	0	0	0	0
BGIOSGA001691	0	0	0	0	0	0	0	0	0	0	0	0	0	0	0
BGIOSGA001692	0	0	0	0	0	0	0	0	0	0	0	0	0	0	0
BGIOSGA001693	0	0	0	0	0	0	0	0	0	0	0	0	0	0	0
BGIOSGA001694	0	0	0	0	0	0	0	0	0	0	0	0	0	0	0
BGIOSGA001695	0	0	0	0	0	0	0	0	0	0	0	0	0	0	0
BGIOSGA001696	0	0	0	0	0	0	0	0	0	0	0	0	0	0	0
BGIOSGA001697	16	13	29	114	44	158	17	19	36	4	15	19	2	10	12
BGIOSGA001698	0	0	0	0	0	0	0	0	0	0	0	0	0	0	0
BGIOSGA001699	957	1108	2065	898	684	1582	783	747	1530	974	1216	2190	694	693	1387
BGIOSGA001700	71945	56586	128531	24205	15407	39612	191695	186702	378397	49194	56307	105501	99539	66006	165545
BGIOSGA001701	1	6	7	29	17	46	9	12	21	46	83	129	66	20	86
BGIOSGA001702	2	41	43	245	149	394	48	156	204	557	1101	1658	855	320	1175
BGIOSGA001703	18	61	79	22	28	50	41	73	114	201	407	608	136	42	178
BGIOSGA001704	25	6	31	7	1	8	7	7	14	2	3	5	4	0	4
BGIOSGA001705	710	921	1631	1102	681	1783	847	964	1811	816	1021	1837	727	656	1383
BGIOSGA001706	148	118	266	82	90	172	141	164	305	131	131	262	131	146	277
BGIOSGA001707	0	0	0	0	0	0	0	1	1	0	0	0	0	0	0
BGIOSGA001708	0	0	0	1	0	1	0	1	1	1	0	1	2	0	2
BGIOSGA001709	0	0	0	0	0	0	0	0	0	0	0	0	0	0	0
BGIOSGA001710	28	35	63	14	5	19	9	6	15	27	41	68	33	25	58
BGIOSGA001711	0	0	0	1	0	1	2	0	2	1	2	3	1	1	2
BGIOSGA001712	64	79	143	99	53	152	64	101	165	49	68	117	71	62	133
BGIOSGA001713	9	10	19	32	10	42	23	4	27	13	13	26	13	18	31
BGIOSGA001714	24	39	63	40	27	67	26	40	66	60	54	114	37	40	77
BGIOSGA001715	5	8	13	7	1	8	7	2	9	4	7	11	5	5	10
BGIOSGA001716	10	5	15	0	0	0	4	3	7	5	4	9	0	0	0
BGIOSGA001717	0	0	0	0	0	0	0	0	0	0	0	0	0	0	0
BGIOSGA001718	4	0	4	0	0	0	4	1	5	0	0	0	0	1	1
BGIOSGA001719	0	0	0	0	0	0	0	0	0	0	0	0	0	0	0
BGIOSGA001720	0	0	0	0	0	0	0	0	0	0	0	0	0	0	0
BGIOSGA001721	0	0	0	0	0	0	0	0	0	0	0	0	0	0	0
BGIOSGA001722	204	255	459	570	293	863	190	325	515	426	377	803	366	369	735
BGIOSGA001723	29	13	42	3	6	9	9	15	24	14	3	17	6	11	17
BGIOSGA001724	31	34	65	99	50	149	27	29	56	34	46	80	49	32	81
BGIOSGA001725	55	40	95	37	13	50	60	73	133	15	20	35	6	14	20
BGIOSGA001726	20	22	42	60	54	114	26	40	66	65	55	120	56	99	155
BGIOSGA001727	0	0	0	0	0	0	0	0	0	2	4	6	2	2	4
BGIOSGA001728	0	0	0	0	0	0	0	0	0	0	0	0	0	0	0
BGIOSGA001729	63	29	92	16	12	28	53	44	97	18	13	31	29	34	63
BGIOSGA001730	503	670	1173	789	646	1435	432	535	967	978	1169	2147	909	717	1626
BGIOSGA001731	1857	993	2850	2517	2003	4520	883	1049	1932	2171	2355	4526	2301	2332	4633
BGIOSGA001732	3	4	7	0	0	0	0	0	0	0	0	0	0	0	0
BGIOSGA001733	0	0	0	0	0	0	0	1	1	0	0	0	0	0	0
BGIOSGA001734	612	618	1230	601	460	1061	625	640	1265	656	695	1351	619	489	1108
BGIOSGA001735	0	0	0	0	0	0	0	0	0	0	0	0	0	0	0
BGIOSGA001736	0	0	0	0	0	0	2	1	3	1	0	1	0	0	0
BGIOSGA001737	0	0	0	2	0	2	0	0	0	0	0	0	2	0	2
BGIOSGA001738	2	67	69	0	0	0	25	26	51	0	0	0	2	0	2
BGIOSGA001739	914	1271	2185	2120	382	2502	2441	2295	4736	1539	1836	3375	1554	1374	2928
BGIOSGA001740	36	18	54	10	9	19	13	19	32	6	3	9	7	4	11
BGIOSGA001741	0	0	0	0	0	0	0	3	3	0	0	0	0	0	0
BGIOSGA001742	1	1	2	18	16	34	4	10	14	4	1	5	0	0	0
BGIOSGA001743	0	0	0	0	0	0	0	0	0	0	0	0	0	0	0
BGIOSGA001744	2	0	2	5	2	7	2	8	10	4	1	5	6	0	6
BGIOSGA001745	0	0	0	0	0	0	0	0	0	0	0	0	0	0	0
BGIOSGA001746	0	0	0	0	0	0	2	4	6	2	0	2	0	0	0
BGIOSGA001747	358	210	568	362	253	615	362	320	682	496	620	1116	465	448	913
BGIOSGA001748	1	2	3	0	2	2	0	2	2	0	0	0	0	0	0
BGIOSGA001749	4	22	26	0	0	0	0	4	4	0	2	2	0	0	0
BGIOSGA001750	347	286	633	587	389	976	327	367	694	405	472	877	607	569	1176
BGIOSGA001751	6	0	6	0	1	1	0	0	0	0	2	2	0	0	0
BGIOSGA001752	4693	3190	7883	7262	3491	10753	5138	5420	10558	9311	10050	19361	4690	4179	8869
BGIOSGA001753	277	291	568	692	242	934	878	848	1726	803	742	1545	746	615	1361
BGIOSGA001754	1	2	3	5	0	5	120	123	243	120	145	265	150	130	280
BGIOSGA001755	0	0	0	0	1	1	69	72	141	213	243	456	250	193	443
BGIOSGA001756	1314	1180	2494	1972	1487	3459	1267	1622	2889	1472	1546	3018	1522	1399	2921
BGIOSGA001757	55	48	103	61	47	108	38	43	81	58	53	111	65	45	110
BGIOSGA001758	311	72	383	171	104	275	6	8	14	10	28	38	5	14	19
BGIOSGA001759	710	466	1176	1124	807	1931	386	431	817	785	797	1582	1016	966	1982
BGIOSGA001760	314	376	690	317	183	500	661	788	1449	308	179	487	177	227	404
BGIOSGA001761	0	0	0	0	0	0	0	0	0	5	4	9	2	4	6
BGIOSGA001762	0	0	0	1	0	1	0	0	0	0	0	0	0	0	0
BGIOSGA001763	0	0	0	19	10	29	0	0	0	0	8	8	0	2	2
BGIOSGA001764	0	0	0	0	0	0	0	0	0	0	0	0	0	0	0
BGIOSGA001765	0	0	0	8	8	16	0	0	0	6	1	7	4	0	4
BGIOSGA001766	0	0	0	0	0	0	0	0	0	0	0	0	0	0	0
BGIOSGA001767	0	0	0	0	0	0	0	0	0	0	0	0	0	0	0
BGIOSGA001768	532	698	1230	612	510	1122	562	671	1233	765	759	1524	668	722	1390
BGIOSGA001769	12195	11133	23328	24647	20658	45305	20218	23790	44008	16123	16879	33002	25417	24935	50352
BGIOSGA001770	2	0	2	0	0	0	1	1	2	0	0	0	0	0	0
BGIOSGA001771	0	0	0	0	0	0	0	0	0	0	0	0	0	0	0
BGIOSGA001772	0	0	0	0	0	0	0	0	0	0	0	0	0	0	0
BGIOSGA001773	0	0	0	0	0	0	0	0	0	0	0	0	0	0	0
BGIOSGA001774	115	255	370	22	27	49	127	153	280	41	33	74	9	16	25
BGIOSGA001775	0	0	0	0	0	0	0	0	0	0	0	0	0	0	0
BGIOSGA001776	741	540	1281	1138	873	2011	430	527	957	854	931	1785	931	788	1719
BGIOSGA001777	0	0	0	0	0	0	0	0	0	0	0	0	0	0	0
BGIOSGA001778	0	0	0	0	0	0	0	2	2	0	0	0	0	0	0
BGIOSGA001779	3	3	6	0	0	0	0	4	4	1	4	5	2	0	2
BGIOSGA001780	0	2	2	0	0	0	0	0	0	2	0	2	0	0	0
BGIOSGA001781	0	0	0	0	0	0	0	0	0	0	0	0	0	0	0
BGIOSGA001782	0	0	0	5	3	8	2	3	5	4	5	9	0	2	2
BGIOSGA001783	1611	1213	2824	2767	2273	5040	1221	1476	2697	2373	2915	5288	2139	1948	4087
BGIOSGA001784	0	2	2	0	0	0	0	2	2	0	0	0	1	6	7
BGIOSGA001785	1340	1384	2724	1146	719	1865	850	903	1753	1245	1542	2787	1355	1307	2662
BGIOSGA001786	0	0	0	0	0	0	0	0	0	0	0	0	0	0	0
BGIOSGA001787	205	288	493	316	159	475	366	394	760	321	320	641	344	325	669
BGIOSGA001788	14	19	33	0	4	4	16	36	52	0	5	5	0	0	0
BGIOSGA001789	451	391	842	1107	831	1938	392	423	815	1020	848	1868	914	958	1872
BGIOSGA001790	1537	1497	3034	3048	2247	5295	1539	1754	3293	3155	3152	6307	2666	2662	5328
BGIOSGA001791	19	12	31	6	15	21	6	7	13	4	5	9	3	3	6
BGIOSGA001792	2087	1612	3699	2286	1681	3967	1617	1972	3589	1838	1845	3683	1924	1850	3774
BGIOSGA001793	1322	1167	2489	1404	959	2363	1024	1242	2266	1265	1237	2502	994	1113	2107
BGIOSGA001794	146	158	304	67	60	127	97	179	276	74	45	119	54	95	149
BGIOSGA001795	5	1	6	1	2	3	5	6	11	4	4	8	2	3	5
BGIOSGA001796	0	0	0	1	0	1	0	0	0	0	0	0	0	0	0
BGIOSGA001797	142	108	250	2046	1570	3616	171	178	349	1343	2043	3386	1683	1270	2953
BGIOSGA001798	49	92	141	0	2	2	49	72	121	4	8	12	0	2	2
BGIOSGA001799	678	615	1293	902	630	1532	484	602	1086	692	840	1532	820	808	1628
BGIOSGA001800	2	4	6	0	0	0	0	0	0	0	0	0	0	0	0
BGIOSGA001801	650	437	1087	346	227	573	332	313	645	397	386	783	362	412	774
BGIOSGA001802	0	0	0	0	0	0	0	0	0	0	0	0	0	0	0
BGIOSGA001803	0	0	0	0	0	0	0	0	0	0	0	0	0	0	0
BGIOSGA001804	26	10	36	16	12	28	32	17	49	9	4	13	8	8	16
BGIOSGA001805	0	0	0	0	0	0	0	0	0	2	0	2	0	0	0
BGIOSGA001806	0	0	0	0	0	0	0	0	0	0	0	0	0	0	0
BGIOSGA001807	12	0	12	2	0	2	0	4	4	2	0	2	2	2	4
BGIOSGA001808	2171	1522	3693	3123	2076	5199	1491	1935	3426	2217	2267	4484	2092	1914	4006
BGIOSGA001809	0	0	0	1	0	1	1	0	1	2	0	2	0	0	0
BGIOSGA001810	278	682	960	554	384	938	779	883	1662	464	528	992	1163	927	2090
BGIOSGA001811	16	12	28	31	25	56	18	15	33	126	192	318	233	304	537
BGIOSGA001812	116	62	178	8	0	8	12	14	26	13	23	36	3	5	8
BGIOSGA001813	2	0	2	4	1	5	0	1	1	0	0	0	0	0	0
BGIOSGA001814	16	46	62	25	15	40	31	36	67	27	21	48	65	52	117
BGIOSGA001815	9	8	17	0	0	0	2	2	4	0	0	0	0	0	0
BGIOSGA001816	145	94	239	163	85	248	96	108	204	118	85	203	114	105	219
BGIOSGA001817	8	0	8	15	26	41	5	3	8	3	13	16	28	21	49
BGIOSGA001818	444	393	837	1099	658	1757	350	534	884	852	820	1672	1164	1182	2346
BGIOSGA001819	4232	2082	6314	6232	4829	11061	1874	2658	4532	4989	5936	10925	5194	5039	10233
BGIOSGA001820	8252	8535	16787	16013	12481	28494	6663	9015	15678	14738	17684	32422	16080	15725	31805
BGIOSGA001821	0	0	0	0	0	0	0	0	0	0	0	0	0	0	0
BGIOSGA001822	0	0	0	9	1	10	0	0	0	2	4	6	3	4	7
BGIOSGA001823	0	0	0	0	0	0	2	1	3	0	0	0	0	0	0
BGIOSGA001824	0	0	0	0	0	0	0	0	0	0	0	0	0	0	0
BGIOSGA001825	2	2	4	0	0	0	7	2	9	0	0	0	16	9	25
BGIOSGA001826	0	0	0	2	0	2	0	1	1	0	0	0	0	0	0
BGIOSGA001827	0	1	1	0	2	2	0	0	0	1	0	1	4	6	10
BGIOSGA001828	0	0	0	0	0	0	56	77	133	120	174	294	147	162	309
BGIOSGA001829	228	372	600	463	226	689	364	418	782	359	404	763	526	480	1006
BGIOSGA001830	12	22	34	0	0	0	12	4	16	4	3	7	4	0	4
BGIOSGA001831	24	17	41	2	0	2	7	7	14	5	5	10	8	2	10
BGIOSGA001832	2	1	3	2	3	5	1	1	2	1	0	1	0	0	0
BGIOSGA001833	0	0	0	0	0	0	0	0	0	0	0	0	0	0	0
BGIOSGA001834	2	6	8	1	1	2	1	0	1	1	2	3	1	2	3
BGIOSGA001835	7	3	10	11	10	21	4	4	8	8	7	15	2	0	2
BGIOSGA001836	0	0	0	1	0	1	1	2	3	1	2	3	0	0	0
BGIOSGA001837	0	0	0	0	0	0	0	0	0	0	0	0	0	0	0
BGIOSGA001838	228	242	470	464	288	752	149	172	321	395	340	735	475	432	907
BGIOSGA001839	736	1372	2108	2391	1682	4073	1296	1170	2466	2627	2685	5312	2525	2530	5055
BGIOSGA001840	2	6	8	0	4	4	2	2	4	1	0	1	3	8	11
BGIOSGA001841	2	2	4	15	2	17	0	4	4	11	7	18	10	0	10
BGIOSGA001842	0	1	1	1	0	1	0	0	0	2	3	5	1	0	1
BGIOSGA001843	0	0	0	0	0	0	0	0	0	0	0	0	0	0	0
BGIOSGA001844	0	0	0	0	0	0	0	0	0	0	0	0	0	0	0
BGIOSGA001845	4734	3801	8535	3676	2903	6579	8025	7382	15407	2796	6394	9190	2535	1035	3570
BGIOSGA001846	0	0	0	0	0	0	0	0	0	0	0	0	0	0	0
BGIOSGA001847	1	0	1	1	0	1	0	1	1	0	1	1	2	1	3
BGIOSGA001848	10	4	14	17	5	22	2	8	10	1	11	12	6	7	13
BGIOSGA001849	0	1	1	0	0	0	2	2	4	0	0	0	0	0	0
BGIOSGA001850	2	0	2	0	1	1	3	0	3	1	0	1	1	0	1
BGIOSGA001851	2641	2353	4994	2417	1871	4288	2800	2994	5794	3170	3284	6454	2316	2404	4720
BGIOSGA001852	0	3	3	3	3	6	0	2	2	2	1	3	0	4	4
BGIOSGA001853	1952	2937	4889	992	425	1417	2873	2805	5678	1212	1454	2666	99	60	159
BGIOSGA001854	0	0	0	0	0	0	0	0	0	0	0	0	0	0	0
BGIOSGA001855	0	0	0	0	0	0	0	0	0	0	0	0	0	0	0
BGIOSGA001856	4701	2497	7198	5274	4083	9357	2472	2720	5192	5204	5676	10880	4131	3897	8028
BGIOSGA001857	0	0	0	0	0	0	0	2	2	0	0	0	0	0	0
BGIOSGA001858	1203	581	1784	2915	2019	4934	729	929	1658	2338	2302	4640	2313	2188	4501
BGIOSGA001859	2261	2647	4908	3114	1754	4868	2172	2371	4543	3465	2750	6215	2962	2759	5721
BGIOSGA001860	1619	919	2538	3407	2201	5608	1137	1159	2296	1970	2138	4108	2005	2061	4066
BGIOSGA001861	2	0	2	0	2	2	15	29	44	5	6	11	0	1	1
BGIOSGA001862	30	11	41	5	3	8	14	21	35	3	1	4	2	0	2
BGIOSGA001863	2	2	4	0	0	0	6	5	11	2	6	8	1	0	1
BGIOSGA001864	0	0	0	0	0	0	1	2	3	0	0	0	0	0	0
BGIOSGA001865	116	80	196	84	71	155	107	103	210	168	207	375	210	135	345
BGIOSGA001866	174	143	317	162	101	263	75	86	161	127	143	270	177	165	342
BGIOSGA001867	32	7	39	29	15	44	9	6	15	12	8	20	1	2	3
BGIOSGA001868	28	16	44	41	29	70	4	14	18	1	9	10	8	21	29
BGIOSGA001869	0	0	0	0	0	0	0	0	0	0	0	0	0	0	0
BGIOSGA001870	1175	1078	2253	1451	1244	2695	1004	1297	2301	1638	1470	3108	1666	1763	3429
BGIOSGA001871	0	0	0	0	0	0	0	1	1	0	0	0	0	0	0
BGIOSGA001872	1074	842	1916	421	456	877	1140	955	2095	453	770	1223	193	174	367
BGIOSGA001873	503	435	938	370	295	665	694	678	1372	414	532	946	522	316	838
BGIOSGA001874	17	7	24	4	1	5	290	339	629	85	86	171	108	94	202
BGIOSGA001875	13	20	33	1	1	2	30	21	51	15	8	23	3	1	4
BGIOSGA001876	667	641	1308	431	319	750	662	621	1283	545	570	1115	248	237	485
BGIOSGA001877	199	296	495	383	324	707	389	463	852	512	539	1051	317	244	561
BGIOSGA001878	355	214	569	388	319	707	180	200	380	288	388	676	344	340	684
BGIOSGA001879	22823	14536	37359	21157	19357	40514	19803	21963	41766	17631	26101	43732	15386	12676	28062
BGIOSGA001880	0	0	0	0	0	0	0	0	0	0	0	0	0	0	0
BGIOSGA001881	0	0	0	0	0	0	0	0	0	0	0	0	0	0	0
BGIOSGA001882	182	195	377	495	261	756	249	283	532	487	493	980	518	488	1006
BGIOSGA001883	711	613	1324	364	384	748	443	640	1083	380	498	878	350	271	621
BGIOSGA001884	7749	7213	14962	13290	9253	22543	6037	6678	12715	10602	12011	22613	8791	8462	17253
BGIOSGA001885	10	9	19	27	13	40	27	18	45	28	17	45	69	58	127
BGIOSGA001886	46	31	77	36	17	53	16	29	45	22	13	35	27	19	46
BGIOSGA001887	129	63	192	150	102	252	123	177	300	202	196	398	330	331	661
BGIOSGA001888	38	19	57	11	11	22	21	36	57	12	12	24	16	15	31
BGIOSGA001889	1008	1141	2149	1191	1010	2201	793	1152	1945	1338	1397	2735	1181	1055	2236
BGIOSGA001890	1814	1325	3139	2192	1887	4079	1287	1521	2808	1676	1582	3258	1736	1834	3570
BGIOSGA001891	5	3	8	1	2	3	1	0	1	0	1	1	1	0	1
BGIOSGA001892	58	30	88	17	13	30	23	10	33	14	15	29	15	16	31
BGIOSGA001893	690	486	1176	750	682	1432	373	416	789	757	860	1617	825	786	1611
BGIOSGA001894	552	2644	3196	1799	1536	3335	2104	2303	4407	1178	862	2040	1270	1829	3099
BGIOSGA001895	811	854	1665	1022	749	1771	661	659	1320	910	1040	1950	779	721	1500
BGIOSGA001896	28	2	30	0	0	0	26	20	46	0	0	0	0	0	0
BGIOSGA001897	3414	2342	5756	4048	2407	6455	2101	2646	4747	3170	3352	6522	3076	3070	6146
BGIOSGA001898	2855	4178	7033	19815	12872	32687	2269	3374	5643	8393	8123	16516	4910	5893	10803
BGIOSGA001899	989	799	1788	1187	778	1965	579	819	1398	962	984	1946	1201	1056	2257
BGIOSGA001900	368	456	824	594	356	950	486	595	1081	540	636	1176	519	506	1025
BGIOSGA001901	0	0	0	0	0	0	0	0	0	1	0	1	2	1	3
BGIOSGA001902	850	488	1338	2204	1205	3409	573	713	1286	1404	1426	2830	1247	1221	2468
BGIOSGA001903	6295	6509	12804	6965	5381	12346	11687	13776	25463	7790	8398	16188	10854	10450	21304
BGIOSGA001904	234	103	337	85	54	139	45	46	91	59	72	131	37	46	83
BGIOSGA001905	3862	3317	7179	3455	2391	5846	2387	3168	5555	3451	3357	6808	3968	4384	8352
BGIOSGA001906	104	134	238	170	66	236	92	106	198	121	85	206	134	140	274
BGIOSGA001907	60	20	80	470	229	699	39	48	87	259	214	473	409	337	746
BGIOSGA001908	0	0	0	0	0	0	0	0	0	0	0	0	0	0	0
BGIOSGA001909	533	434	967	497	309	806	487	499	986	437	388	825	404	328	732
BGIOSGA001910	235	249	484	138	118	256	121	129	250	118	109	227	193	203	396
BGIOSGA001911	0	1	1	2	2	4	0	0	0	0	0	0	0	0	0
BGIOSGA001912	0	0	0	0	0	0	0	0	0	0	0	0	0	0	0
BGIOSGA001913	347	234	581	779	585	1364	308	342	650	539	557	1096	630	549	1179
BGIOSGA001914	453	583	1036	407	246	653	367	414	781	338	376	714	424	396	820
BGIOSGA001915	985	752	1737	2034	1533	3567	559	787	1346	1786	1728	3514	2006	1791	3797
BGIOSGA001916	164	116	280	269	157	426	142	163	305	315	193	508	209	215	424
BGIOSGA001917	1039	962	2001	1313	938	2251	975	1054	2029	1817	1525	3342	1307	1231	2538
BGIOSGA001918	22	13	35	31	23	54	6	15	21	23	20	43	17	32	49
BGIOSGA001919	507	274	781	667	489	1156	299	329	628	475	556	1031	576	550	1126
BGIOSGA001920	6	0	6	2	2	4	0	1	1	4	4	8	4	3	7
BGIOSGA001921	0	1	1	2	0	2	0	4	4	0	0	0	0	0	0
BGIOSGA001922	573	597	1170	884	639	1523	545	594	1139	707	718	1425	826	805	1631
BGIOSGA001923	1216	1586	2802	1169	788	1957	1320	1537	2857	952	839	1791	1151	928	2079
BGIOSGA001924	0	0	0	2	0	2	0	0	0	0	0	0	1	0	1
BGIOSGA001925	665	463	1128	1153	967	2120	322	374	696	1196	1128	2324	856	914	1770
BGIOSGA001926	4782	7205	11987	4964	3296	8260	5971	7381	13352	5001	5129	10130	4743	4285	9028
BGIOSGA001927	328	267	595	394	215	609	320	384	704	294	339	633	289	248	537
BGIOSGA001928	510	613	1123	485	370	855	474	595	1069	547	571	1118	460	434	894
BGIOSGA001929	472	268	740	315	200	515	208	267	475	139	182	321	131	189	320
BGIOSGA001930	221	229	450	38	36	74	106	135	241	28	24	52	26	21	47
BGIOSGA001931	268	384	652	118	88	206	440	574	1014	241	184	425	76	35	111
BGIOSGA001932	1	1	2	3	0	3	0	0	0	1	0	1	3	0	3
BGIOSGA001933	147	2802	2949	3633	3016	6649	2096	2085	4181	3286	3760	7046	3745	2947	6692
BGIOSGA001934	282	198	480	316	218	534	238	165	403	412	465	877	326	364	690
BGIOSGA001935	367	230	597	404	262	666	270	363	633	309	327	636	350	292	642
BGIOSGA001936	2197	2059	4256	2863	1734	4597	1937	2175	4112	2307	2222	4529	1897	1698	3595
BGIOSGA001937	150	102	252	187	126	313	142	162	304	183	155	338	202	190	392
BGIOSGA001938	2	3	5	6	26	32	1	2	3	1	1	2	6	3	9
BGIOSGA001939	458	312	770	945	1067	2012	211	249	460	347	207	554	314	354	668
BGIOSGA001940	1538	450	1988	169	134	303	546	660	1206	277	217	494	63	54	117
BGIOSGA001941	2029	1002	3031	1597	1156	2753	1718	1897	3615	1492	1618	3110	1565	1322	2887
BGIOSGA001942	105	111	216	187	141	328	649	897	1546	134	159	293	559	420	979
BGIOSGA001943	2	0	2	0	1	1	0	2	2	0	2	2	1	4	5
BGIOSGA001944	27	6	33	20	14	34	0	0	0	0	1	1	0	0	0
BGIOSGA001945	16	45	61	14	7	21	0	0	0	0	0	0	0	0	0
BGIOSGA001946	269	910	1179	458	273	731	627	836	1463	960	1184	2144	1301	1056	2357
BGIOSGA001947	55	27	82	72	58	130	25	32	57	27	42	69	26	53	79
BGIOSGA001948	107	61	168	6	14	20	389	409	798	36	89	125	0	0	0
BGIOSGA001949	594	587	1181	1107	729	1836	685	911	1596	872	1001	1873	1084	1041	2125
BGIOSGA001950	4	2	6	2	0	2	0	0	0	0	0	0	0	0	0
BGIOSGA001951	1889	1886	3775	2173	2438	4611	2188	2267	4455	2938	3179	6117	2754	2674	5428
BGIOSGA001952	4	19	23	2	7	9	2	4	6	4	6	10	8	6	14
BGIOSGA001953	295	181	476	222	219	441	133	118	251	160	172	332	320	285	605
BGIOSGA001954	0	0	0	1	0	1	0	4	4	3	0	3	4	0	4
BGIOSGA001955	985	626	1611	1105	839	1944	759	1003	1762	1390	1292	2682	1393	1310	2703
BGIOSGA001956	996	621	1617	1275	678	1953	332	403	735	819	915	1734	453	579	1032
BGIOSGA001957	0	0	0	0	0	0	0	0	0	0	0	0	0	0	0
BGIOSGA001958	2	4	6	31	25	56	0	0	0	0	0	0	0	0	0
BGIOSGA001959	2217	1862	4079	2869	2389	5258	1302	1558	2860	2317	2365	4682	3023	2788	5811
BGIOSGA001960	0	0	0	0	0	0	0	2	2	3	7	10	1	0	1
BGIOSGA001961	6	9	15	0	0	0	1	0	1	0	0	0	0	0	0
BGIOSGA001962	1075	1143	2218	1024	891	1915	1100	1201	2301	1236	1423	2659	698	810	1508
BGIOSGA001963	13	17	30	0	0	0	10	5	15	2	0	2	9	2	11
BGIOSGA001964	403	260	663	47	19	66	308	249	557	27	29	56	8	6	14
BGIOSGA001965	420	459	879	954	430	1384	880	841	1721	843	1120	1963	947	788	1735
BGIOSGA001966	229	125	354	190	153	343	123	115	238	255	345	600	143	146	289
BGIOSGA001967	25287	40771	66058	49907	32822	82729	55003	70108	125111	26872	11614	38486	75647	78688	154335
BGIOSGA001968	28222	51714	79936	49948	35626	85574	64233	80859	145092	30371	17860	48231	73659	76103	149762
BGIOSGA001969	0	0	0	0	0	0	0	0	0	0	0	0	0	0	0
BGIOSGA001970	0	4	4	0	0	0	1	2	3	0	0	0	0	0	0
BGIOSGA001971	6	10	16	10	4	14	17	22	39	19	36	55	16	7	23
BGIOSGA001972	0	0	0	0	0	0	0	0	0	0	0	0	0	0	0
BGIOSGA001973	1909	2270	4179	2728	2076	4804	2738	3101	5839	2846	2842	5688	3261	2718	5979
BGIOSGA001974	6	0	6	1	2	3	14	4	18	2	2	4	0	0	0
BGIOSGA001975	121	133	254	255	253	508	98	156	254	192	201	393	277	300	577
BGIOSGA001976	1176	741	1917	952	837	1789	1334	1427	2761	1022	1284	2306	1145	1111	2256
BGIOSGA001977	5730	5312	11042	8418	6915	15333	3904	4612	8516	6454	7409	13863	5580	5490	11070
BGIOSGA001978	1841	4103	5944	2789	2459	5248	4068	4696	8764	2601	3083	5684	2837	2724	5561
BGIOSGA001979	527	234	761	519	279	798	159	214	373	244	170	414	270	235	505
BGIOSGA001980	0	0	0	0	0	0	0	0	0	0	0	0	0	0	0
BGIOSGA001981	56	66	122	61	60	121	15	56	71	39	33	72	45	25	70
BGIOSGA001982	2339	1730	4069	2527	1821	4348	1603	1936	3539	2225	2621	4846	2098	1965	4063
BGIOSGA001983	134	104	238	239	116	355	86	109	195	238	274	512	238	218	456
BGIOSGA001984	58	193	251	8	8	16	35	35	70	3	5	8	3	6	9
BGIOSGA001985	1972	2532	4504	1019	586	1605	1614	1865	3479	691	386	1077	693	856	1549
BGIOSGA001986	4	5	9	17	9	26	294	329	623	181	209	390	145	212	357
BGIOSGA001987	0	0	0	0	0	0	0	0	0	0	0	0	0	0	0
BGIOSGA001988	2	4	6	4	1	5	0	0	0	0	0	0	0	0	0
BGIOSGA001989	54	50	104	31	17	48	0	0	0	0	0	0	0	0	0
BGIOSGA001990	0	0	0	0	0	0	0	1	1	0	1	1	0	0	0
BGIOSGA001991	1471	729	2200	1432	1028	2460	996	1077	2073	1219	1475	2694	1036	986	2022
BGIOSGA001992	3129	1623	4752	158	130	288	2334	2139	4473	565	744	1309	60	58	118
BGIOSGA001993	4	7	11	0	0	0	2	6	8	0	0	0	0	0	0
BGIOSGA001994	11	19	30	12	5	17	1	1	2	27	11	38	0	2	2
BGIOSGA001995	0	0	0	0	0	0	0	0	0	0	0	0	0	0	0
BGIOSGA001996	462	524	986	1218	876	2094	173	250	423	445	473	918	399	437	836
BGIOSGA001997	0	0	0	0	0	0	2	0	2	0	2	2	0	0	0
BGIOSGA001998	0	0	0	0	3	3	0	0	0	0	0	0	0	0	0
BGIOSGA001999	1	0	1	0	0	0	0	0	0	0	0	0	0	0	0
[truncated: 38,746 more rows]

## Sheet: RNASeq Power
Satble genes id	sum Vlue IR64A	Sum value IR64H	Sum value RKBA	Sum value RKBH	Sum Value RKBHL	Power Value RKBA_IR64A	AlphaValue RKBA_IR64A	PowerValue RKBH_IR64H	AlphaValue RKBH_IR64H	PowerValue RKBHL_RKBH	AlphaValue RKBHL_RKBH
BGIOSGA000089	455	23	1003	236	7	2.16193e-78	1	2.16193e-78	0.999363	0.0949714	0.839237
BGIOSGA000258	173	11	140	74	3	4.12238e-18	1	4.12238e-18	0.938562	0.521917	0.484836
BGIOSGA000344	83	66	212	1114	51	8.62945e-14	1	8.62945e-14	1	3.52098e-11	1
BGIOSGA000508	1024	54	1288	271	22	2.96123e-146	1	2.96123e-146	1	0.00013112	0.999172
BGIOSGA001992	4752	288	4473	1309	118	0	1	0	1	9.13257e-26	1
BGIOSGA002472	2214	117	2811	1193	222	0	1	0	1	8.64569e-46	1
BGIOSGA002552	459	7	355	295	16	3.95015e-49	1	3.95015e-49	0.841312	0.00175962	0.99285
BGIOSGA002554	797	154	1372	997	234	1.12027e-128	1	1.12027e-128	1	2.1594e-46	1
BGIOSGA002818	36	0	73	12	0	1.9e-05	0.99984	1.9e-05	0.025	1.8	0.025
BGIOSGA002869	79	8	159	83	1	3.87935e-12	1	3.87935e-12	0.863807	1.12429	0.20191
BGIOSGA003046	676	51	243	327	47	1.2446e-43	1	1.2446e-43	1	2.3088e-09	1
BGIOSGA003085	288	1666	147	153	618	4.83453e-23	1	4.83453e-23	1	2.22838e-29	1
BGIOSGA003465	32	45	56	570	52	0.000130089	0.999178	0.000130089	1	6.48562e-11	1
BGIOSGA003781	596	15	310	71	7	4.2832e-50	1	4.2832e-50	0.978477	0.115107	0.815204
BGIOSGA003785	493	6	312	36	2	8.60745e-47	1	8.60745e-47	0.728059	0.782157	0.343877
BGIOSGA003830	384	6	202	58	1	7.83788e-32	1	7.83788e-32	0.751577	1.12655	0.201102
BGIOSGA003879	33	16	24	113	11	0.00330661	0.988067	0.00330661	0.988624	0.0213255	0.947786
BGIOSGA003912	151	107	323	598	93	1.97744e-24	1	1.97744e-24	1	7.11696e-19	1
BGIOSGA003922	9405	95	3628	1870	9	0	1	0	1	0.0352026	0.923298
BGIOSGA004263	26	0	53	12	0	0.000569303	0.997175	0.000569303	0.025	1.8	0.025
BGIOSGA004346	1374	64	1938	362	83	1.74059e-208	1	1.74059e-208	1	1.06341e-15	1
BGIOSGA004351	2957	117	1335	1228	58	1.75978e-239	1	1.75978e-239	1	9.18881e-13	1
BGIOSGA004377	20	10	65	68	13	0.00166049	0.993181	0.00166049	0.916532	0.0139801	0.96241
BGIOSGA004437	598	420	626	2817	409	1.60678e-76	1	1.60678e-76	1	6.08994e-90	1
BGIOSGA004581	35	37	42	2	44	0.000248214	0.998585	0.000248214	0.344286	0.776397	0.346645
BGIOSGA004724	1976	0	554	78	2	8.36441e-110	1	8.36441e-110	0.025	0.764889	0.352216
BGIOSGA005065	474	4	1126	119	3	9.07387e-84	1	9.07387e-84	0.605162	0.512654	0.490545
BGIOSGA005106	26	30	71	299	9	0.000255862	0.998549	0.000255862	0.999961	0.0390005	0.917091
BGIOSGA005904	736	7	795	47	0	1.63721e-96	1	1.63721e-96	0.797842	1.8	0.025
BGIOSGA005957	30	5	54	373	36	0.000224903	0.998697	0.000224903	0.710298	1.94935e-07	0.999997
BGIOSGA006017	237	97	349	863	184	4.70796e-34	1	4.70796e-34	1	1.00958e-36	1
BGIOSGA006847	98	10	116	57	9	3.20844e-12	1	3.20844e-12	0.910125	0.0609091	0.884101
BGIOSGA007024	199	5	292	235	14	2.67528e-28	1	2.67528e-28	0.706968	0.00461331	0.984398
BGIOSGA007655	154	7	79	34	6	5.29058e-12	1	5.29058e-12	0.77851	0.202434	0.724491
BGIOSGA008467	304	1353	927	185	31	1.53416e-56	1	1.53416e-56	1	5.3422e-06	0.999946
BGIOSGA009659	1362	12	398	79	8	4.39333e-77	1	4.39333e-77	0.954811	0.0768583	0.86232
BGIOSGA009672	520	200	290	989	162	1.55799e-45	1	1.55799e-45	1	1.46769e-33	1
BGIOSGA010210	98	3	87	36	4	1.52741e-10	1	1.52741e-10	0.469566	0.386443	0.574434
BGIOSGA010386	50	60	28	741	89	0.000441633	0.997712	0.000441633	1	1.27319e-18	1
BGIOSGA010776	1266	0	1572	90	0	4.72042e-181	1	4.72042e-181	0.025	1.8	0.025
BGIOSGA011188	248	29	336	123	27	1.92059e-34	1	1.92059e-34	0.999787	5.24534e-05	0.999619
BGIOSGA011265	3236	3000	4471	32834	2487	0	1	0	1	0	1
BGIOSGA011332	73	30	140	259	43	5.41773e-11	1	5.41773e-11	0.999954	2.24279e-08	1
BGIOSGA011443	1654	4	943	35	1	2.96183e-154	1	2.96183e-154	0.573234	1.13143	0.199365
BGIOSGA011561	77	26	226	746	93	2.95374e-13	1	2.95374e-13	0.999898	2.03451e-19	1
BGIOSGA011834	374	952	367	3965	761	2.71257e-45	1	2.71257e-45	1	2.51153e-164	1
BGIOSGA011983	112	121	406	905	31	1.12456e-20	1	1.12456e-20	1	8.86082e-07	0.999989
BGIOSGA012041	2837	179	3338	774	19	0	1	0	1	0.000327092	0.998218
BGIOSGA012046	1039	13	1076	78	6	3.76911e-135	1	3.76911e-135	0.965501	0.164474	0.761696
BGIOSGA012259	303	6	847	58	2	4.7165e-55	1	4.7165e-55	0.751577	0.770059	0.349706
BGIOSGA012679	288	14	358	102	13	9.62993e-39	1	9.62993e-39	0.977861	0.0104071	0.97019
BGIOSGA012707	698	38	779	214	2	7.96146e-93	1	7.96146e-93	0.999996	0.755211	0.356945
BGIOSGA012711	479	474	202	2520	545	2.73026e-34	1	2.73026e-34	1	7.25474e-114	1
BGIOSGA013051	439	12	154	212	3	3.28667e-27	1	3.28667e-27	0.968173	0.505898	0.494745
BGIOSGA013052	4031	190	1198	1631	61	1.71351e-240	1	1.71351e-240	1	1.38162e-13	1
BGIOSGA013525	4904	43	11088	1372	0	0	1	0	1	1.8	0.025
BGIOSGA014216	247	5	224	38	4	4.44323e-28	1	4.44323e-28	0.662521	0.383339	0.576657
BGIOSGA014550	21	20	4	238	13	0.427624	0.545719	0.427624	0.998146	0.00709193	0.978
BGIOSGA014920	92	3	121	28	1	5.15154e-12	1	5.15154e-12	0.461472	1.13447	0.19829
BGIOSGA015766	2464	256	1565	1464	76	1.70166e-249	1	1.70166e-249	1	7.45458e-17	1
BGIOSGA016539	2011	150	542	882	180	2.74979e-108	1	2.74979e-108	1	3.59866e-36	1
BGIOSGA016756	239	48	323	257	48	4.2839e-33	1	4.2839e-33	1	3.27802e-09	1
BGIOSGA016782	76	47	129	600	115	5.90372e-11	1	5.90372e-11	1	7.73473e-23	1
BGIOSGA017002	91	126	52	742	170	1.69789e-07	0.999997	1.69789e-07	1	2.46232e-33	1
BGIOSGA017212	46	6	95	51	3	5.16969e-07	0.999993	5.16969e-07	0.74622	0.532806	0.478195
BGIOSGA017287	9	50	12	221	43	0.198664	0.728059	0.198664	1	3.59816e-08	0.999999
BGIOSGA017380	214	17	538	138	5	4.35239e-37	1	4.35239e-37	0.99273	0.228272	0.700698
BGIOSGA018537	886	0	832	56	2	7.4968e-109	1	7.4968e-109	0.025	0.770775	0.349359
BGIOSGA018676	417	44	562	192	34	3.03412e-59	1	3.03412e-59	0.999999	1.57215e-06	0.999981
BGIOSGA019036	2825	673	1348	3093	566	1.49731e-237	1	1.49731e-237	1	6.99294e-122	1
BGIOSGA019234	4431	230	3088	22	0	0	1	0	0.999071	1.8	0.025
BGIOSGA019700	269	0	321	102	15	2.25284e-35	1	2.25284e-35	0.025	0.00492889	0.983547
BGIOSGA019816	14	53	15	8	140	0.0776676	0.861254	0.0776676	0.847138	0.0669173	0.875712
BGIOSGA020094	21	33	31	3	31	0.00646113	0.979573	0.00646113	0.466961	0.554873	0.464963
BGIOSGA020130	130	111	121	558	72	1.60269e-14	1	1.60269e-14	1	8.66194e-15	1
BGIOSGA020478	25	33	75	1134	167	0.0002949	0.998366	0.0002949	0.999996	3.57609e-35	1
BGIOSGA020509	890	98	2851	958	32	6.32257e-175	1	6.32257e-175	1	5.24478e-07	0.999993
BGIOSGA021011	134	788	279	197	31	2.35976e-21	1	2.35976e-21	1	4.72723e-06	0.999952
BGIOSGA021069	3055	89	2045	1106	100	0	1	0	1	1.19984e-21	1
BGIOSGA021122	67	82	29	15	62	0.000138569	0.999133	0.000138569	0.980807	0.00799713	0.975797
BGIOSGA021349	1193	0	506	115	0	1.8538e-89	1	1.8538e-89	0.025	1.8	0.025
BGIOSGA021352	579	201	688	855	163	9.32612e-79	1	9.32612e-79	1	5.60203e-33	1
BGIOSGA021590	500	6	396	32	0	1.72721e-54	1	1.72721e-54	0.720504	1.8	0.025
BGIOSGA021931	1876	9	1368	39	6	4.82183e-205	1	4.82183e-205	0.864528	0.193742	0.732758
BGIOSGA022584	237	0	71	23	0	1.39212e-12	1	1.39212e-12	0.025	1.8	0.025
BGIOSGA022800	10764	340	2858	2249	266	0	1	0	1	7.48175e-59	1
BGIOSGA023517	104	14	50	74	14	1.18496e-07	0.999998	1.18496e-07	0.972808	0.00926352	0.972808
BGIOSGA023632	34	39	90	326	31	1.41616e-05	0.999875	1.41616e-05	0.999999	2.12887e-06	0.999976
BGIOSGA023633	2664	1623	1543	9306	2103	7.44268e-255	1	7.44268e-255	1	0	1
BGIOSGA023745	503	0	171	9	0	1.24129e-30	1	1.24129e-30	0.025	1.8	0.025
BGIOSGA023812	14	20	25	150	7	0.0349168	0.923772	0.0349168	0.997405	0.099833	0.833291
BGIOSGA023848	1254	4	1248	55	0	7.06217e-161	1	7.06217e-161	0.589306	1.8	0.025
BGIOSGA024179	57	31	56	176	14	2.19738e-06	0.999975	2.19738e-06	0.999941	0.00519594	0.982837
BGIOSGA024656	166	1	84	24	0	7.39698e-13	1	7.39698e-13	0.197405	1.8	0.025
BGIOSGA024841	2543	153	1207	1089	228	2.28141e-212	1	2.28141e-212	1	3.87673e-46	1
BGIOSGA024868	64	53	189	13	0	5.94954e-11	1	5.94954e-11	0.955173	1.8	0.025
BGIOSGA025130	970	0	379	41	0	7.67414e-68	1	7.67414e-68	0.025	1.8	0.025
BGIOSGA025132	950	0	313	13	0	3.19118e-58	1	3.19118e-58	0.025	1.8	0.025
BGIOSGA025234	366	20	214	82	0	1.6545e-32	1	1.6545e-32	0.995042	1.8	0.025
BGIOSGA025240	515	0	141	34	0	2.22382e-26	1	2.22382e-26	0.025	1.8	0.025
BGIOSGA026003	4092	171	1126	1073	188	1.23031e-229	1	1.23031e-229	1	7.76133e-39	1
BGIOSGA026384	188	10	294	134	7	2.23786e-27	1	2.23786e-27	0.93227	0.101442	0.831344
BGIOSGA026405	438	57	700	270	45	4.908e-67	1	4.908e-67	1	9.01751e-09	1
BGIOSGA026414	225	150	171	735	129	5.31384e-23	1	5.31384e-23	1	3.85445e-26	1
BGIOSGA026484	8305	386	2065	2202	452	0	1	0	1	1.24408e-94	1
BGIOSGA026664	5	3	11	59	265	0.413897	0.555134	0.413897	0.48107	4.66001e-11	1
BGIOSGA026769	272	0	84	9	0	6.89485e-15	1	6.89485e-15	0.025	1.8	0.025
BGIOSGA027114	72	8	97	55	4	2.03633e-09	1	2.03633e-09	0.848818	0.365904	0.589306
BGIOSGA027173	430	21	643	99	0	5.49272e-64	1	5.49272e-64	0.997033	1.8	0.025
BGIOSGA027445	9	0	33	154	0	0.0839117	0.853144	0.0839117	0.025	1.8	0.025
BGIOSGA027798	138	10	41	62	5	3.73043e-07	0.999995	3.73043e-07	0.913334	0.248831	0.682528
BGIOSGA027799	5205	407	1839	2240	305	0	1	0	1	8.78048e-67	1
BGIOSGA027833	55	3	197	58	1	8.22617e-10	1	8.22617e-10	0.480753	1.12655	0.201102
BGIOSGA028110	9773	10	5183	113	0	0	1	0	0.929333	1.8	0.025
BGIOSGA028468	584	113	594	479	41	1.4754e-73	1	1.4754e-73	1	1.39029e-08	1
BGIOSGA029174	1568	67	553	427	34	1.62161e-103	1	1.62161e-103	1	3.9681e-07	0.999994
BGIOSGA029364	4461	62	7175	1581	7	0	1	0	1	0.0879004	0.848064
BGIOSGA029891	82	6	116	37	6	5.24488e-11	1	5.24488e-11	0.729706	0.196934	0.729706
BGIOSGA029951	43	7	111	224	25	5.16805e-07	0.999993	5.16805e-07	0.838681	4.38221e-05	0.999673
BGIOSGA030166	912	0	685	12	0	7.05573e-99	1	7.05573e-99	0.025	1.8	0.025
BGIOSGA030296	90	212	185	1941	410	5.23557e-14	1	5.23557e-14	1	4.6763e-85	1
BGIOSGA030410	635	25	327	245	58	3.64738e-53	1	3.64738e-53	0.9997	9.80387e-11	1
BGIOSGA030578	508	74	208	350	53	1.10344e-35	1	1.10344e-35	1	1.57546e-10	1
BGIOSGA031018	129	401	133	2112	475	3.32346e-15	1	3.32346e-15	1	5.51786e-98	1
BGIOSGA031076	43	0	37	15	0	0.000165736	0.998992	0.000165736	0.025	1.8	0.025
BGIOSGA031549	337	6	439	87	6	1.10817e-46	1	1.10817e-46	0.764759	0.161481	0.764759
BGIOSGA031784	112	17	30	282	4	2.39539e-05	0.999804	2.39539e-05	0.99495	0.333859	0.613311
BGIOSGA031785	34	25	27	290	16	0.00187419	0.992473	0.00187419	0.99974	0.00177136	0.992811
BGIOSGA031786	58	14	22	821	5	0.00119955	0.994775	0.00119955	0.987441	0.214313	0.713412
BGIOSGA031788	81	54	131	763	60	1.73943e-11	1	1.73943e-11	1	8.03856e-13	1
BGIOSGA031793	195	42	57	397	2	4.49503e-10	1	4.49503e-10	1	0.75262	0.358218
BGIOSGA032167	3262	23	1222	104	7	3.12206e-231	1	3.12206e-231	0.998423	0.105831	0.826085
BGIOSGA032270	87	31	232	169	15	1.14439e-14	1	1.14439e-14	0.999937	0.00350247	0.9875
BGIOSGA032416	32	0	76	16	0	4.31834e-05	0.999677	4.31834e-05	0.025	1.8	0.025
BGIOSGA032537	8699	160	3486	1148	227	0	1	0	1	2.15268e-46	1
BGIOSGA032580	1166	4	437	30	2	1.16232e-79	1	1.16232e-79	0.566124	0.788412	0.340888
BGIOSGA032680	3691	257	4040	1446	329	0	1	0	1	1.13484e-66	1
BGIOSGA032683	123	27	157	111	23	4.71732e-16	1	4.71732e-16	0.999542	0.000253118	0.998562
BGIOSGA032689	211	146	223	2071	200	8.25885e-26	1	8.25885e-26	1	1.45512e-44	1
BGIOSGA032853	348	0	350	95	5	1.51987e-42	1	1.51987e-42	0.025	0.235868	0.69391
BGIOSGA032920	1240	8	390	237	26	3.91977e-74	1	3.91977e-74	0.882749	2.70067e-05	0.999783
BGIOSGA033067	167	241	209	3273	368	6.33253e-22	1	6.33253e-22	1	4.81863e-83	1
BGIOSGA033720	33	2	95	67	0	1.5589e-05	0.999865	1.5589e-05	0.351016	1.8	0.025
BGIOSGA033828	3420	9	827	95	0	1.19803e-171	1	1.19803e-171	0.90069	1.8	0.025
BGIOSGA034158	61	14	55	368	81	1.54148e-06	0.999982	1.54148e-06	0.985986	2.0049e-15	1
BGIOSGA034434	37101	47	17560	472	5	0	1	0	1	0.216398	0.711493
BGIOSGA034682	8689	20	3518	245	0	0	1	0	0.998177	1.8	0.025
BGIOSGA034755	677	16	920	140	10	1.43874e-98	1	1.43874e-98	0.990075	0.0295198	0.932941
BGIOSGA034967	3935	40	4420	636	9	0	1	0	1	0.036583	0.921021
BGIOSGA035064	10376	287	4868	3493	435	0	1	0	1	9.85482e-98	1
BGIOSGA035979	494	179	499	3901	55	1.53702e-61	1	1.53702e-61	1	1.73447e-12	1
BGIOSGA035981	59	26	13	351	22	0.0158294	0.958578	0.0158294	0.999846	0.00010946	0.999289
BGIOSGA036323	869	0	428	159	4	1.51013e-71	1	1.51013e-71	0.025	0.339928	0.608686
BGIOSGA037260	961	28	557	452	24	9.35569e-89	1	9.35569e-89	0.999941	3.75559e-05	0.999713
BGIOSGA037300	133	2	35	53	2	2.91602e-06	0.999968	2.91602e-06	0.348792	0.771947	0.348792
BGIOSGA037302	398	9	243	282	7	1.5973e-36	1	1.5973e-36	0.916641	0.093602	0.840929
BGIOSGA037321	13634	6	5816	194	0	0	1	0	0.779563	1.8	0.025
BGIOSGA037378	304	0	466	118	0	5.68647e-45	1	5.68647e-45	0.025	1.8	0.025
BGIOSGA037632	58	6	47	2692	38	7.26333e-06	0.99993	7.26333e-06	0.790898	1.63039e-08	1
BGIOSGA037633	4360	698	2302	9045	630	0	1	0	1	3.59653e-151	1
BGIOSGA038325	88	2	174	28	1	1.68571e-13	1	1.68571e-13	0.339625	1.13447	0.19829
BGIOSGA040566	69	19	112	242	52	9.68171e-10	1	9.68171e-10	0.997372	9.13712e-10	1
BGIOSGA000001	5649	1367	2162	1243	733	0	1	0	1	2.68583e-117	1
BGIOSGA000002	7289	16547	5580	15441	12738	0	1	0	1	0	1
BGIOSGA000003	44	188	89	172	101	1.17158e-06	0.999986	1.17158e-06	1	9.35465e-15	1
BGIOSGA000004	496	625	467	668	400	1.52823e-59	1	1.52823e-59	1	4.81869e-62	1
BGIOSGA000005	484	1063	374	745	882	6.5753e-52	1	6.5753e-52	1	3.25973e-102	1
BGIOSGA000006	1454	1526	1103	1453	1470	2.48083e-161	1	2.48083e-161	1	6.48257e-189	1
BGIOSGA000007	1072	1894	867	1953	2064	4.08219e-122	1	4.08219e-122	1	6.06555e-262	1
BGIOSGA000008	73	1172	24	23	29	0.000417201	0.997818	0.000417201	0.999682	0.00556566	0.981866
BGIOSGA000009	4649	7126	3566	8156	6421	0	1	0	1	0	1
BGIOSGA000010	1773	2152	2471	2095	1869	1.10602e-269	1	1.10602e-269	1	9.97208e-258	1
BGIOSGA000011	654	391	743	370	474	1.68091e-87	1	1.68091e-87	1	4.32985e-51	1
BGIOSGA000012	344	496	307	299	851	2.06914e-39	1	2.06914e-39	1	1.46432e-54	1
BGIOSGA000013	474	515	290	431	600	6.22629e-44	1	6.22629e-44	1	3.2942e-62	1
BGIOSGA000014	2523	4438	1960	5184	4596	1.05025e-288	1	1.05025e-288	1	0	1
BGIOSGA000015	216	198	445	356	311	3.89763e-35	1	3.89763e-35	1	2.26495e-40	1
BGIOSGA000016	778	955	87	410	395	2.521e-18	1	2.521e-18	1	2.18253e-49	1
BGIOSGA000017	363	286	207	245	167	1.07444e-31	1	1.07444e-31	1	1.55072e-23	1
BGIOSGA000018	157	118	399	111	132	7.12206e-27	1	7.12206e-27	1	6.0145e-14	1
BGIOSGA000019	108	2	21	2	0	0.000531131	0.997333	0.000531131	0.203818	1.8	0.025
BGIOSGA000020	1775	4146	1994	4560	4253	1.16805e-244	1	1.16805e-244	1	0	1
BGIOSGA000021	0	0	7	0	0	1.8	0.025	1.8	0.025	1.8	0.025
BGIOSGA000022	0	0	0	0	0	1.8	0.025	1.8	0.025	1.8	0.025
BGIOSGA000023	154	46	63	42	35	3.23739e-10	1	3.23739e-10	0.999587	0.000248214	0.998585
BGIOSGA000024	430	378	372	395	598	6.07383e-49	1	6.07383e-49	1	7.44295e-59	1
BGIOSGA000025	59	66	20	46	58	0.00198119	0.992124	0.00198119	0.999958	8.52714e-06	0.999919
BGIOSGA000026	144	200	101	147	172	1.01069e-13	1	1.01069e-13	1	1.42298e-18	1
BGIOSGA000027	1469	1508	1435	1866	1575	1.25673e-187	1	1.25673e-187	1	6.83234e-222	1
BGIOSGA000028	444	1397	387	1139	994	7.94364e-51	1	7.94364e-51	1	9.86243e-136	1
BGIOSGA000029	555	432	542	678	1002	2.78826e-68	1	2.78826e-68	1	2.38958e-102	1
BGIOSGA000030	1488	1340	492	328	307	3.01667e-93	1	3.01667e-93	1	1.75916e-38	1
BGIOSGA000031	0	0	3	1	1	1.8	0.025	1.8	0.025	1.36961	0.123109
BGIOSGA000032	589	641	293	379	370	5.70643e-48	1	5.70643e-48	1	8.38107e-46	1
BGIOSGA000033	541	632	965	2044	1380	3.41638e-87	1	3.41638e-87	1	8.71153e-214	1
BGIOSGA000034	107	114	275	159	213	5.02827e-18	1	5.02827e-18	1	1.75659e-21	1
BGIOSGA000035	5520	8547	6414	8983	7067	0	1	0	1	0	1
BGIOSGA000036	258	216	544	410	481	1.12963e-42	1	1.12963e-42	1	1.40001e-54	1
BGIOSGA000037	0	0	0	0	1	1.8	0.025	1.8	0.025	1.8	0.025
BGIOSGA000038	9	14	0	6	2	1.8	0.025	1.8	0.640483	0.91658	0.283096
BGIOSGA000039	1	2	0	0	0	1.8	0.025	1.8	0.025	1.8	0.025
BGIOSGA000040	138	437	4	7	10	0.342038	0.607086	0.342038	0.844009	0.309959	0.631902
BGIOSGA000041	298	579	271	501	444	2.98443e-34	1	2.98443e-34	1	3.27014e-58	1
BGIOSGA000042	0	0	0	5	6	1.8	0.025	1.8	0.025	0.556715	0.463871
BGIOSGA000043	0	0	0	0	0	1.8	0.025	1.8	0.025	1.8	0.025
BGIOSGA000044	0	0	5	0	4	1.8	0.025	1.8	0.025	1.8	0.025
BGIOSGA000045	1792	4369	1483	2277	3174	1.7481e-210	1	1.7481e-210	1	0	1
BGIOSGA000046	384	14	120	85	56	1.40745e-21	1	1.40745e-21	0.975256	1.18962e-07	0.999998
BGIOSGA000047	3867	2548	1700	2784	2444	0	1	0	1	0	1
BGIOSGA000048	417	393	272	326	374	5.06462e-40	1	5.06462e-40	1	1.83652e-42	1
BGIOSGA000049	14	37	272	659	792	0.00438999	0.985007	0.00438999	0.999999	1.30113e-90	1
BGIOSGA000050	22	12	12	11	3	0.0611339	0.883783	0.0611339	0.773879	0.648203	0.412098
BGIOSGA000051	1513	1260	1398	1484	2002	8.10573e-188	1	8.10573e-188	1	2.12465e-221	1
BGIOSGA000052	160	168	110	195	171	3.92986e-15	1	3.92986e-15	1	1.69143e-21	1
BGIOSGA000053	2	0	0	0	0	1.8	0.025	1.8	0.025	1.8	0.025
BGIOSGA000054	9944	9193	13212	10813	12200	0	1	0	1	0	1
BGIOSGA000055	622	879	749	736	742	2.12257e-85	1	2.12257e-85	1	3.51192e-93	1
BGIOSGA000056	25	14	21	9	3	0.0110099	0.968837	0.0110099	0.754694	0.677187	0.396619
BGIOSGA000057	9	5	7	4	4	0.334794	0.612595	0.334794	0.392573	0.749572	0.359719
BGIOSGA000058	1462	895	1519	928	975	1.01748e-192	1	1.01748e-192	1	4.30632e-121	1
BGIOSGA000059	0	0	0	0	0	1.8	0.025	1.8	0.025	1.8	0.025
BGIOSGA000060	5194	7056	5153	6792	6284	0	1	0	1	0	1
BGIOSGA000061	256	546	220	500	649	2.71725e-28	1	2.71725e-28	1	2.04141e-70	1
BGIOSGA000062	4567	3677	2853	3831	3653	0	1	0	1	0	1
BGIOSGA000063	2007	1802	2140	2546	2768	1.36435e-270	1	1.36435e-270	1	0	1
BGIOSGA000064	442	607	357	727	756	1.93981e-48	1	1.93981e-48	1	1.79096e-93	1
BGIOSGA000065	16	6	16	2	7	0.0548632	0.892798	0.0548632	0.283096	0.896423	0.291767
BGIOSGA000066	0	0	0	0	0	1.8	0.025	1.8	0.025	1.8	0.025
BGIOSGA000067	8	0	0	0	0	1.8	0.025	1.8	0.025	1.8	0.025
BGIOSGA000068	266	312	74	294	194	2.28604e-13	1	2.28604e-13	1	6.25777e-28	1
BGIOSGA000069	103	485	21	86	139	0.000569157	0.997176	0.000569157	1	3.19538e-12	1
BGIOSGA000070	1846	1551	1452	2949	1903	7.99106e-211	1	7.99106e-211	1	4.11031e-303	1
BGIOSGA000071	1475	1849	935	1527	1779	9.9323e-147	1	9.9323e-147	1	3.19657e-213	1
BGIOSGA000072	0	0	0	0	0	1.8	0.025	1.8	0.025	1.8	0.025
BGIOSGA000073	0	0	0	2	1	1.8	0.025	1.8	0.025	1.27917	0.150155
BGIOSGA000074	449	484	199	500	528	3.1527e-33	1	3.1527e-33	1	9.23733e-64	1
BGIOSGA000075	1071	410	808	730	399	3.74207e-117	1	3.74207e-117	1	4.56408e-64	1
BGIOSGA000076	49	340	59	66	75	4.76833e-06	0.999951	4.76833e-06	1	5.79365e-08	0.999999
BGIOSGA000077	1314	1120	1108	989	1026	2.13669e-154	1	2.13669e-154	1	1.57763e-128	1
BGIOSGA000078	4	2	10	2	7	0.527572	0.481378	0.527572	0.203818	0.896423	0.291767
BGIOSGA000079	827	509	257	685	674	4.49434e-48	1	4.49434e-48	1	2.22899e-85	1
BGIOSGA000080	198	410	249	475	528	2.79792e-26	1	2.79792e-26	1	5.23059e-62	1
BGIOSGA000081	21	17	9	22	20	0.118877	0.810867	0.118877	0.938856	0.0172153	0.955778
BGIOSGA000082	3461	9594	3241	6288	4216	0	1	0	1	0	1
BGIOSGA000083	334	168	417	129	76	2.37767e-45	1	2.37767e-45	1	5.90372e-11	1
BGIOSGA000084	7	9	3	22	0	0.719794	0.374606	0.719794	0.816117	1.8	0.025
BGIOSGA000085	23	9	4	5	3	0.419177	0.551494	0.419177	0.52765	0.788412	0.340888
BGIOSGA000086	0	0	0	0	0	1.8	0.025	1.8	0.025	1.8	0.025
BGIOSGA000087	196	214	1305	458	361	1.68932e-41	1	1.68932e-41	1	1.44379e-49	1
BGIOSGA000088	1470	4844	2480	10882	12250	2.47127e-240	1	2.47127e-240	1	0	1
BGIOSGA000090	1028	3672	1301	3749	2685	2.92719e-147	1	2.92719e-147	1	0	1
BGIOSGA000091	80	23	34	5	0	2.16277e-05	0.999821	2.16277e-05	0.630797	1.8	0.025
BGIOSGA000092	0	0	0	0	0	1.8	0.025	1.8	0.025	1.8	0.025
BGIOSGA000093	1767	151	1268	241	138	6.40194e-191	1	6.40194e-191	1	1.14511e-20	1
BGIOSGA000094	144	118	104	86	65	5.71807e-14	1	5.71807e-14	1	2.0777e-08	1
BGIOSGA000095	8	2	330	253	318	0.0598573	0.885595	0.0598573	0.357369	5.44178e-34	1
BGIOSGA000096	8	12	9	3	5	0.29469	0.644114	0.29469	0.41823	0.788412	0.340888
BGIOSGA000097	241	16	1289	197	1547	7.26023e-50	1	7.26023e-50	0.991674	1.31293e-42	1
BGIOSGA000098	2824	2474	2609	2736	2624	0	1	0	1	0	1
BGIOSGA000099	8	3	1	0	4	1.16975	0.185984	1.16975	0.025	1.8	0.025
BGIOSGA000100	0	0	0	0	0	1.8	0.025	1.8	0.025	1.8	0.025
BGIOSGA000101	30	0	2	0	0	0.788412	0.340888	0.788412	0.025	1.8	0.025
BGIOSGA000102	225	158	150	124	89	3.18002e-21	1	3.18002e-21	1	6.60379e-12	1
BGIOSGA000103	3088	4857	2647	4158	5387	0	1	0	1	0	1
BGIOSGA000104	255	157	182	129	128	2.95744e-25	1	2.95744e-25	1	6.63309e-15	1
BGIOSGA000105	481	1323	579	1384	1451	2.67613e-65	1	2.67613e-65	1	6.02509e-183	1
BGIOSGA000106	0	0	0	0	0	1.8	0.025	1.8	0.025	1.8	0.025
BGIOSGA000107	0	0	0	0	0	1.8	0.025	1.8	0.025	1.8	0.025
BGIOSGA000108	0	3	0	0	0	1.8	0.025	1.8	0.025	1.8	0.025
BGIOSGA000109	2873	1999	4709	1241	1866	0	1	0	1	8.24846e-193	1
BGIOSGA000110	1088	892	911	981	1311	1.77011e-126	1	1.77011e-126	1	8.92364e-144	1
BGIOSGA000111	661	1705	608	1502	1737	2.3512e-79	1	2.3512e-79	1	6.91912e-209	1
BGIOSGA000112	272	138	699	408	190	5.25026e-48	1	5.25026e-48	1	3.84744e-31	1
BGIOSGA000113	438	673	409	691	468	4.80874e-52	1	4.80874e-52	1	1.56221e-69	1
BGIOSGA000114	950	650	651	573	513	1.36368e-97	1	1.36368e-97	1	2.32117e-67	1
BGIOSGA000115	273	162	53	33	22	3.86714e-10	1	3.86714e-10	0.999964	0.00464227	0.984319
BGIOSGA000116	0	0	0	0	0	1.8	0.025	1.8	0.025	1.8	0.025
BGIOSGA000117	0	0	0	0	0	1.8	0.025	1.8	0.025	1.8	0.025
BGIOSGA000118	4	2	2	0	0	0.979689	0.256893	0.979689	0.025	1.8	0.025
BGIOSGA000119	0	0	41	24	6	1.8	0.025	1.8	0.025	0.23079	0.698439
BGIOSGA000120	0	0	15	5	0	1.8	0.025	1.8	0.025	1.8	0.025
BGIOSGA000121	0	0	5	6	1	1.8	0.025	1.8	0.025	1.18471	0.180878
BGIOSGA000122	0	0	0	0	0	1.8	0.025	1.8	0.025	1.8	0.025
BGIOSGA000123	0	0	0	0	0	1.8	0.025	1.8	0.025	1.8	0.025
BGIOSGA000124	15	2	6	10	0	0.288366	0.649252	0.288366	0.309002	1.8	0.025
BGIOSGA000125	537	11	166	30	27	1.99061e-30	1	1.99061e-30	0.894586	0.00283233	0.989471
BGIOSGA000126	1790	2798	1710	2734	2624	2.29202e-227	1	2.29202e-227	1	0	1
BGIOSGA000127	0	0	0	0	0	1.8	0.025	1.8	0.025	1.8	0.025
BGIOSGA000128	26	4	14	18	24	0.0329268	0.927105	0.0329268	0.534954	0.0188432	0.952561
BGIOSGA000129	10	0	18	2	2	0.112207	0.818572	0.112207	0.025	1.11896	0.203818
BGIOSGA000130	413	1323	303	924	1088	1.29146e-42	1	1.29146e-42	1	1.72106e-127	1
BGIOSGA000131	5	15	18	21	17	0.338307	0.609917	0.338307	0.91747	0.0286819	0.934404
BGIOSGA000132	16	17	2	6	2	0.819915	0.326082	0.819915	0.66411	0.91658	0.283096
BGIOSGA000133	1101	83	131	32	4	5.59512e-28	1	5.59512e-28	0.999749	0.393777	0.569215
BGIOSGA000134	10	4	0	0	0	1.8	0.025	1.8	0.025	1.8	0.025
BGIOSGA000135	844	2677	2598	2783	3086	5.97572e-164	1	5.97572e-164	1	0	1
BGIOSGA000136	133	71	7	9	6	0.101556	0.831207	0.101556	0.892335	0.386443	0.574434
BGIOSGA000137	5	8	0	0	0	1.8	0.025	1.8	0.025	1.8	0.025
BGIOSGA000138	2	0	0	0	0	1.8	0.025	1.8	0.025	1.8	0.025
BGIOSGA000139	0	0	0	0	0	1.8	0.025	1.8	0.025	1.8	0.025
BGIOSGA000140	980	928	960	690	461	1.33705e-123	1	1.33705e-123	1	7.70294e-69	1
BGIOSGA000141	0	0	0	0	0	1.8	0.025	1.8	0.025	1.8	0.025
BGIOSGA000142	1990	2798	2848	3588	4223	4.17883e-307	1	4.17883e-307	1	0	1
BGIOSGA000143	0	0	0	0	0	1.8	0.025	1.8	0.025	1.8	0.025
BGIOSGA000144	692	546	560	519	588	1.75886e-77	1	1.75886e-77	1	1.16089e-68	1
BGIOSGA000145	50	95	14	60	59	0.0138214	0.962744	0.0138214	1	9.97956e-07	0.999987
BGIOSGA000146	239	161	147	153	239	1.77898e-21	1	1.77898e-21	1	4.87992e-22	1
BGIOSGA000147	4803	2728	6375	3946	3685	0	1	0	1	0	1
BGIOSGA000148	344	119	249	187	73	6.872e-35	1	6.872e-35	1	4.5108e-12	1
BGIOSGA000149	0	0	0	0	0	1.8	0.025	1.8	0.025	1.8	0.025
BGIOSGA000150	360	385	118	287	222	6.05547e-21	1	6.05547e-21	1	5.11867e-30	1
BGIOSGA000151	28	17	10	20	24	0.0732957	0.867054	0.0732957	0.929389	0.01401	0.962347
BGIOSGA000152	473	331	280	271	310	6.72508e-43	1	6.72508e-43	1	6.29437e-35	1
BGIOSGA000153	1438	2070	879	1456	1411	1.21595e-139	1	1.21595e-139	1	3.86953e-185	1
BGIOSGA000154	2017	9937	3967	18589	10498	0	1	0	1	0	1
BGIOSGA000155	71	164	28	74	59	0.000150226	0.999072	0.000150226	1	1.95374e-07	0.999997
BGIOSGA000156	19	123	4	42	117	0.437743	0.538874	0.437743	0.999994	5.41395e-07	0.999993
BGIOSGA000157	15	4	5	84	41	0.362626	0.591715	0.362626	0.599401	3.16493e-06	0.999966
BGIOSGA000158	10	78	13	21	176	0.158695	0.767629	0.158695	0.995906	0.000293204	0.998374
BGIOSGA000159	26	43	18	29	84	0.0159535	0.958325	0.0159535	0.997026	7.07081e-05	0.999509
BGIOSGA000160	299	544	280	493	299	6.2995e-35	1	6.2995e-35	1	1.60741e-45	1
BGIOSGA000161	2874	3105	2560	2993	1938	0	1	0	1	0	1
BGIOSGA000162	17	1	9	4	1	0.143126	0.784018	0.143126	0.171677	1.21218	0.171677
BGIOSGA000163	0	0	1	1	0	1.8	0.025	1.8	0.025	1.8	0.025
BGIOSGA000164	1325	726	1211	769	881	8.46594e-163	1	8.46594e-163	1	5.51057e-104	1
BGIOSGA000165	9484	7019	8455	8253	6908	0	1	0	1	0	1
BGIOSGA000166	643	1090	909	1104	610	4.78002e-95	1	4.78002e-95	1	2.48798e-99	1
BGIOSGA000167	659	38	432	101	101	7.81507e-65	1	7.81507e-65	0.999967	1.35966e-11	1
BGIOSGA000168	821	286	1248	534	412	2.57124e-126	1	2.57124e-126	1	1.75735e-57	1
BGIOSGA000169	27	11	11	1	2	0.0597161	0.885796	0.0597161	0.190448	1.27917	0.150155
BGIOSGA000170	0	0	0	0	0	1.8	0.025	1.8	0.025	1.8	0.025
BGIOSGA000171	47	7	46	20	19	2.96707e-05	0.999765	2.96707e-05	0.731546	0.0243439	0.942169
BGIOSGA000172	383	79	424	31	46	2.11997e-49	1	2.11997e-49	0.999639	0.000331291	0.998199
BGIOSGA000173	846	576	529	296	490	1.19109e-81	1	1.19109e-81	1	4.11035e-45	1
BGIOSGA000174	696	813	425	518	736	1.35627e-65	1	1.35627e-65	1	4.77942e-76	1
BGIOSGA000175	216	258	94	226	227	3.30114e-15	1	3.30114e-15	1	5.08931e-27	1
BGIOSGA000176	7685	10734	11988	9051	9813	0	1	0	1	0	1
BGIOSGA000177	2361	2490	2318	2894	2346	1.28168e-306	1	1.28168e-306	1	0	1
BGIOSGA000178	3220	2322	1909	2937	1660	0	1	0	1	2.81357e-277	1
BGIOSGA000179	1572	811	1121	886	1074	1.46537e-168	1	1.46537e-168	1	9.60475e-124	1
BGIOSGA000180	922	439	503	313	303	1.21239e-81	1	1.21239e-81	1	2.63285e-37	1
BGIOSGA000181	895	454	880	1207	642	1.03338e-112	1	1.03338e-112	1	3.20722e-106	1
BGIOSGA000182	56	142	86	85	167	1.09431e-07	0.999998	1.09431e-07	1	5.44437e-13	1
BGIOSGA000183	100	623	195	484	482	2.35292e-15	1	2.35292e-15	1	8.58558e-60	1
BGIOSGA000184	4	7	1	4	0	1.21218	0.171677	1.21218	0.438778	1.8	0.025
BGIOSGA000185	1427	2582	1038	2099	2304	2.43964e-154	1	2.43964e-154	1	1.94047e-287	1
BGIOSGA000186	32	80	13	55	88	0.0307752	0.930771	0.0307752	0.999997	1.13553e-07	0.999998
BGIOSGA000187	660	1312	382	664	1123	6.53098e-60	1	6.53098e-60	1	9.62499e-106	1
BGIOSGA000188	0	1	0	9	0	1.8	0.025	1.8	0.18777	1.8	0.025
BGIOSGA000189	0	0	0	0	0	1.8	0.025	1.8	0.025	1.8	0.025
BGIOSGA000190	65	8	284	49	76	3.63755e-12	1	3.63755e-12	0.843366	9.75013e-07	0.999988
BGIOSGA000191	365	239	336	191	200	1.16505e-42	1	1.16505e-42	1	3.90206e-23	1
BGIOSGA000192	1563	1672	1459	1575	1738	2.7343e-195	1	2.7343e-195	1	1.94195e-214	1
BGIOSGA000193	1360	1335	815	1120	469	4.00242e-130	1	4.00242e-130	1	5.54508e-83	1
BGIOSGA000194	1626	449	924	585	501	3.16471e-151	1	3.16471e-151	1	3.73667e-67	1
BGIOSGA000195	15	4	231	113	137	0.00301171	0.988935	0.00301171	0.604423	2.42883e-14	1
BGIOSGA000196	129	55	235	96	132	1.45406e-19	1	1.45406e-19	0.999999	8.24959e-13	1
BGIOSGA000197	2	4	3	1	1	1.03319	0.235755	1.03319	0.171677	1.36961	0.123109
BGIOSGA000198	514	346	418	381	393	5.91416e-57	1	5.91416e-57	1	2.111e-47	1
BGIOSGA000199	2190	1358	3392	2254	1508	0	1	0	1	3.96264e-235	1
BGIOSGA000200	3992	5101	3988	5717	5734	0	1	0	1	0	1
BGIOSGA000201	45	1016	132	752	815	1.32309e-07	0.999998	1.32309e-07	1	7.34635e-99	1
BGIOSGA000202	33	297	6	39	24	0.204491	0.722554	0.204491	0.999999	0.0020605	0.991868
BGIOSGA000203	5	4	3	0	3	0.788412	0.340888	0.788412	0.025	1.8	0.025
BGIOSGA000204	0	0	4	20	28	1.8	0.025	1.8	0.025	0.00974811	0.97169
BGIOSGA000205	4265	4478	5321	6117	6086	0	1	0	1	0	1
BGIOSGA000206	1247	720	878	375	294	1.30014e-131	1	1.30014e-131	1	4.56447e-40	1
BGIOSGA000207	2193	1774	1830	1788	2303	2.35887e-260	1	2.35887e-260	1	9.15254e-263	1
BGIOSGA000208	212	176	140	170	215	8.07617e-20	1	8.07617e-20	1	1.89778e-22	1
BGIOSGA000209	227	214	182	328	367	5.83463e-24	1	5.83463e-24	1	3.25896e-42	1
BGIOSGA000210	0	0	0	1	0	1.8	0.025	1.8	0.025	1.8	0.025
BGIOSGA000211	0	0	0	1	0	1.8	0.025	1.8	0.025	1.8	0.025
BGIOSGA000212	4571	2700	5402	3007	1358	0	1	0	1	1.05069e-243	1
BGIOSGA000213	5551	3400	5017	3495	2349	0	1	0	1	0	1
BGIOSGA000214	2261	3291	3138	3105	3211	0	1	0	1	0	1
BGIOSGA000215	14498	15485	9109	10421	7905	0	1	0	1	0	1
BGIOSGA000216	73	122	69	107	120	4.76477e-08	0.999999	4.76477e-08	1	4.78092e-13	1
BGIOSGA000217	198	330	124	192	168	7.8148e-18	1	7.8148e-18	1	3.99479e-21	1
BGIOSGA000218	3246	2575	2858	2284	2266	0	1	0	1	5.82708e-298	1
BGIOSGA000219	477	498	244	388	222	3.30617e-39	1	3.30617e-39	1	4.55107e-34	1
BGIOSGA000220	4259	2298	6062	3439	2707	0	1	0	1	0	1
BGIOSGA000221	1111	1463	1633	1772	1479	2.25651e-170	1	2.25651e-170	1	4.60645e-209	1
BGIOSGA000222	792	636	751	861	820	2.2291e-97	1	2.2291e-97	1	1.84489e-106	1
BGIOSGA000223	61	8	24	13	8	0.000635499	0.996905	0.000635499	0.711909	0.215945	0.711909
BGIOSGA000224	1279	2584	3743	4367	5059	1.81925e-248	1	1.81925e-248	1	0	1
BGIOSGA000225	5040	6723	4142	8691	7592	0	1	0	1	0	1
BGIOSGA000226	1408	4164	1128	3293	3153	4.3937e-161	1	4.3937e-161	1	0	1
BGIOSGA000227	1834	4181	1738	4655	3323	3.88078e-232	1	3.88078e-232	1	0	1
BGIOSGA000228	4286	1884	3660	2790	2255	0	1	0	1	0	1
BGIOSGA000229	9	4	10	11	5	0.237222	0.69271	0.237222	0.491482	0.413897	0.555134
BGIOSGA000230	1387	979	1677	857	1047	1.68388e-196	1	1.68388e-196	1	5.54322e-120	1
BGIOSGA000231	1074	798	1693	852	847	2.69234e-169	1	2.69234e-169	1	1.03673e-107	1
BGIOSGA000232	16	3	16	8	12	0.0548632	0.892798	0.0548632	0.386662	0.23079	0.698439
BGIOSGA000233	4539	6277	4089	6961	5549	0	1	0	1	0	1
BGIOSGA000234	9	0	0	0	0	1.8	0.025	1.8	0.025	1.8	0.025
BGIOSGA000235	1261	939	1933	1051	1082	1.42483e-197	1	1.42483e-197	1	2.34882e-136	1
BGIOSGA000236	967	770	1117	896	772	2.00042e-132	1	2.00042e-132	1	4.60123e-105	1
BGIOSGA000237	3945	996	2774	1350	919	0	1	0	1	5.67267e-140	1
BGIOSGA000238	43	2	12	2	4	0.0288563	0.934099	0.0288563	0.203818	0.979689	0.256893
BGIOSGA000239	580	2136	73	1510	1294	4.76893e-15	1	4.76893e-15	1	7.08174e-180	1
BGIOSGA000240	5	0	0	2	0	1.8	0.025	1.8	0.025	1.8	0.025
BGIOSGA000241	0	0	0	0	0	1.8	0.025	1.8	0.025	1.8	0.025
BGIOSGA000242	1213	1056	1004	1106	1222	1.2018e-140	1	1.2018e-140	1	6.20124e-149	1
BGIOSGA000243	19880	16033	15001	18634	14546	0	1	0	1	0	1
BGIOSGA000244	336	91	194	75	46	1.81865e-29	1	1.81865e-29	1	1.91229e-06	0.999978
BGIOSGA000245	1349	1004	984	1059	1144	7.36018e-146	1	7.36018e-146	1	8.30205e-141	1
BGIOSGA000246	1	0	0	0	0	1.8	0.025	1.8	0.025	1.8	0.025
BGIOSGA000247	147	6	48	8	0	3.25256e-08	0.999999	3.25256e-08	0.554056	1.8	0.025
BGIOSGA000248	419	235	364	313	239	9.61077e-48	1	9.61077e-48	1	1.25214e-32	1
BGIOSGA000249	1830	1374	1771	1617	1961	3.45367e-234	1	3.45367e-234	1	1.69573e-230	1
BGIOSGA000250	0	0	0	0	0	1.8	0.025	1.8	0.025	1.8	0.025
BGIOSGA000251	486	567	374	460	423	5.25094e-52	1	5.25094e-52	1	2.4962e-54	1
BGIOSGA000252	146	128	104	82	46	4.70855e-14	1	4.70855e-14	1	1.15616e-06	0.999986
BGIOSGA000253	17	91	17	24	65	0.0435403	0.90989	0.0435403	0.998524	0.000545528	0.997273
BGIOSGA000254	1	62	3	6	20	1.23681	0.163616	1.23681	0.75411	0.250074	0.68145
BGIOSGA000255	4134	7644	2528	9087	7415	0	1	0	1	0	1
BGIOSGA000256	1196	1384	1121	1468	1859	1.99584e-148	1	1.99584e-148	1	7.73979e-213	1
BGIOSGA000257	4431	4999	3549	5679	5096	0	1	0	1	0	1
BGIOSGA000259	236	13	196	156	54	1.7897e-25	1	1.7897e-25	0.975064	3.92173e-09	1
BGIOSGA000260	328	237	83	156	109	2.17948e-15	1	2.17948e-15	1	6.94799e-15	1
BGIOSGA000261	5014	5732	5852	6005	5533	0	1	0	1	0	1
BGIOSGA000262	5062	8575	5770	7576	6762	0	1	0	1	0	1
BGIOSGA000263	2704	3368	2169	3623	3044	0	1	0	1	0	1
BGIOSGA000264	2398	2432	2098	1235	2210	5.4821e-293	1	5.4821e-293	1	2.37299e-205	1
BGIOSGA000265	48	61	45	118	170	3.00016e-05	0.999763	3.00016e-05	1	3.21102e-16	1
BGIOSGA000266	0	0	0	0	0	1.8	0.025	1.8	0.025	1.8	0.025
BGIOSGA000267	36	35	16	38	44	0.0129313	0.964638	0.0129313	0.997957	0.000128338	0.999187
BGIOSGA000268	271	262	401	297	289	2.79365e-39	1	2.79365e-39	1	2.10216e-35	1
BGIOSGA000269	18	31	13	38	48	0.0675075	0.874901	0.0675075	0.996706	8.44976e-05	0.999429
BGIOSGA000270	91	2	52	2	3	1.69789e-07	0.999997	1.69789e-07	0.203818	1.03319	0.235755
BGIOSGA000271	263	592	237	531	484	6.89226e-30	1	6.89226e-30	1	7.94802e-63	1
BGIOSGA000272	1125	826	1846	916	718	1.87256e-180	1	1.87256e-180	1	7.44877e-102	1
BGIOSGA000273	54	47	56	53	70	3.26783e-06	0.999965	3.26783e-06	0.999888	8.0182e-07	0.99999
BGIOSGA000274	0	0	0	0	2	1.8	0.025	1.8	0.025	1.8	0.025
BGIOSGA000275	905	1597	503	1443	1290	4.40635e-81	1	4.40635e-81	1	1.10461e-175	1
BGIOSGA000276	824	7694	2277	9357	10719	1.93315e-155	1	1.93315e-155	1	0	1
BGIOSGA000277	1221	2149	1014	1509	1651	7.09867e-142	1	7.09867e-142	1	2.55202e-204	1
BGIOSGA000278	10	12	22	17	25	0.0917328	0.843252	0.0917328	0.851327	0.0203903	0.949568
BGIOSGA000279	8502	17866	7667	19715	20451	0	1	0	1	0	1
BGIOSGA000280	514	1777	353	1657	1797	1.80089e-51	1	1.80089e-51	1	4.9793e-224	1
BGIOSGA000281	7939	397	2079	284	374	0	1	0	1	3.31259e-39	1
BGIOSGA000282	33	0	99	0	3	1.36384e-05	0.999879	1.36384e-05	0.025	1.8	0.025
BGIOSGA000283	10311	13968	4939	10114	5393	0	1	0	1	0	1
BGIOSGA000284	0	2	0	2	2	1.8	0.025	1.8	0.203818	1.11896	0.203818
BGIOSGA000285	2459	3181	2470	3347	3375	0	1	0	1	0	1
BGIOSGA000286	539	192	914	289	339	3.34496e-85	1	3.34496e-85	1	7.94368e-38	1
BGIOSGA000287	3055	3119	1809	3605	2681	1.28659e-297	1	1.28659e-297	1	0	1
BGIOSGA000288	39	31	33	30	23	0.000458309	0.99764	0.000458309	0.993047	0.00507005	0.983171
BGIOSGA000289	5	5	3	1	4	0.788412	0.340888	0.788412	0.177046	1.21218	0.171677
BGIOSGA000290	3578	5251	4012	7283	4414	0	1	0	1	0	1
BGIOSGA000291	2123	1713	1668	1820	1627	2.51483e-243	1	2.51483e-243	1	3.22986e-223	1
BGIOSGA000292	2659	2162	2576	2584	1551	0	1	0	1	9.45292e-253	1
BGIOSGA000293	1250	676	889	659	878	9.52079e-133	1	9.52079e-133	1	5.24497e-95	1
BGIOSGA000294	1805	3306	1446	3376	3222	3.53331e-208	1	3.53331e-208	1	0	1
BGIOSGA000295	260	97	258	77	100	4.15909e-31	1	4.15909e-31	1	6.24521e-10	1
BGIOSGA000296	0	0	0	0	0	1.8	0.025	1.8	0.025	1.8	0.025
BGIOSGA000297	0	1	0	0	0	1.8	0.025	1.8	0.025	1.8	0.025
BGIOSGA000298	4688	4541	3881	4938	5205	0	1	0	1	0	1
BGIOSGA000299	3731	2900	4622	3577	2815	0	1	0	1	0	1
BGIOSGA000300	0	8	1	6	8	1.8	0.025	1.8	0.554056	0.415457	0.554056
BGIOSGA000301	166355	338249	198849	369681	321764	0	1	0	1	0	1
BGIOSGA000302	14	0	4	15	6	0.474646	0.514569	0.474646	0.025	0.288366	0.649252
BGIOSGA000303	106	34	51	46	40	8.30216e-08	0.999999	8.30216e-08	0.998836	7.6828e-05	0.999473
BGIOSGA000304	598	372	328	569	403	3.98477e-52	1	3.98477e-52	1	2.39616e-58	1
BGIOSGA000305	902	889	885	1357	1395	1.67949e-113	1	1.67949e-113	1	1.74428e-177	1
BGIOSGA000306	1983	1670	1021	1836	1591	8.74925e-174	1	8.74925e-174	1	1.98031e-221	1
BGIOSGA000307	755	727	567	571	511	3.24144e-81	1	3.24144e-81	1	4.23066e-67	1
BGIOSGA000308	0	0	0	0	0	1.8	0.025	1.8	0.025	1.8	0.025
BGIOSGA000309	1494	2101	2589	1997	2104	7.09066e-247	1	7.09066e-247	1	1.3336e-267	1
BGIOSGA000310	837	1250	526	1180	2148	5.26748e-81	1	5.26748e-81	1	3.68076e-197	1
BGIOSGA000311	1457	848	906	1294	2395	4.08965e-143	1	4.08965e-143	1	3.81083e-218	1
BGIOSGA000312	1368	1567	1814	1490	1410	4.86765e-202	1	4.86765e-202	1	3.0671e-187	1
BGIOSGA000313	612	1116	734	1094	1481	8.24988e-84	1	8.24988e-84	1	7.26634e-162	1
BGIOSGA000314	3110	1641	2343	1991	1760	0	1	0	1	2.37017e-243	1
BGIOSGA000315	808	125	301	138	198	4.68172e-54	1	4.68172e-54	1	4.4256e-19	1
BGIOSGA000316	46	145	42	97	308	5.76903e-05	0.999587	5.76903e-05	1	3.16854e-17	1
BGIOSGA000317	376	252	545	306	116	7.01899e-55	1	7.01899e-55	1	9.07095e-20	1
BGIOSGA000318	1999	2165	966	1738	1630	9.74917e-168	1	9.74917e-168	1	2.01526e-218	1
BGIOSGA000319	609	185	199	142	100	2.69025e-36	1	2.69025e-36	1	1.47946e-13	1
BGIOSGA000320	876	1245	763	1580	1094	3.00182e-103	1	3.00182e-103	1	1.91589e-166	1
BGIOSGA000321	6	5	7	2	9	0.451467	0.529718	0.451467	0.271899	0.867853	0.304316
BGIOSGA000322	2863	2863	1976	3357	2047	1.80066e-306	1	1.80066e-306	1	0	1
BGIOSGA000323	2	4	1	0	2	1.27917	0.150155	1.27917	0.025	1.8	0.025
BGIOSGA000324	27	19	25	17	40	0.00516484	0.982919	0.00516484	0.923714	0.00858887	0.974387
BGIOSGA000325	6368	9327	5245	11729	9291	0	1	0	1	0	1
BGIOSGA000326	3594	6894	5857	6520	5181	0	1	0	1	0	1
BGIOSGA000327	546	291	429	289	344	1.8184e-59	1	1.8184e-59	1	4.29163e-38	1
BGIOSGA000328	1895	2290	1627	2045	1621	1.34955e-227	1	1.34955e-227	1	2.53643e-235	1
BGIOSGA000329	1848	2257	1951	3649	3254	2.45476e-247	1	2.45476e-247	1	0	1
BGIOSGA000330	6	5	9	4	11	0.386443	0.574434	0.386443	0.392573	0.511143	0.491482
BGIOSGA000331	515	308	326	491	680	5.45987e-49	1	5.45987e-49	1	4.03571e-71	1
BGIOSGA000332	2780	2005	1864	2231	698	3.89159e-292	1	3.89159e-292	1	5.77831e-136	1
BGIOSGA000333	11962	13901	10040	15207	14768	0	1	0	1	0	1
BGIOSGA000334	2000	1921	1581	1989	1781	1.24959e-229	1	1.24959e-229	1	8.25396e-245	1
BGIOSGA000335	0	23	4	4	5	1.8	0.025	1.8	0.551494	0.684895	0.392573
BGIOSGA000336	0	0	1	0	0	1.8	0.025	1.8	0.025	1.8	0.025
BGIOSGA000337	1029	133	143	135	73	4.11256e-30	1	4.11256e-30	1	7.53078e-11	1
BGIOSGA000338	1314	1089	829	1148	749	8.84103e-130	1	8.84103e-130	1	3.12066e-115	1
BGIOSGA000339	3215	10930	5987	8623	15671	0	1	0	1	0	1
BGIOSGA000340	0	1	0	9	2	1.8	0.025	1.8	0.18777	0.867853	0.304316
BGIOSGA000341	0	0	0	0	0	1.8	0.025	1.8	0.025	1.8	0.025
BGIOSGA000342	32	23	25	22	21	0.00308688	0.988712	0.00308688	0.966793	0.0151555	0.959961
BGIOSGA000343	148	16	0	0	0	1.8	0.025	1.8	0.025	1.8	0.025
BGIOSGA000345	2743	1093	708	1324	777	3.30368e-144	1	3.30368e-144	1	7.65332e-125	1
BGIOSGA000346	44	125	202	456	374	3.34905e-08	0.999999	3.34905e-08	1	1.71434e-50	1
BGIOSGA000347	72	7	19	14	5	0.00188926	0.992423	0.00188926	0.686243	0.372897	0.584199
BGIOSGA000348	13	3	44	19	17	0.021216	0.947994	0.021216	0.445114	0.0349517	0.923714
BGIOSGA000349	5	9	0	0	0	1.8	0.025	1.8	0.025	1.8	0.025
BGIOSGA000350	10	9	13	11	9	0.158695	0.767629	0.158695	0.711702	0.21617	0.711702
BGIOSGA000351	33	160	113	330	398	9.04238e-06	0.999915	9.04238e-06	1	4.66238e-44	1
BGIOSGA000352	471	34	177	62	5	6.79655e-31	1	6.79655e-31	0.999587	0.248831	0.682528
BGIOSGA000353	347	117	114	236	131	3.46013e-20	1	3.46013e-20	1	8.44408e-20	1
BGIOSGA000354	1898	1688	1997	2060	2580	8.56369e-254	1	8.56369e-254	1	4.23201e-300	1
BGIOSGA000355	0	0	0	0	0	1.8	0.025	1.8	0.025	1.8	0.025
BGIOSGA000356	908	210	700	353	408	5.93199e-100	1	5.93199e-100	1	2.52214e-46	1
BGIOSGA000357	52	20	56	26	19	4.30757e-06	0.999955	4.30757e-06	0.967533	0.0135583	0.963301
BGIOSGA000358	1400	2851	1469	2965	4232	3.29491e-185	1	3.29491e-185	1	0	1
BGIOSGA000359	2840	5888	1394	6796	4237	1.40529e-243	1	1.40529e-243	1	0	1
BGIOSGA000360	0	0	0	0	0	1.8	0.025	1.8	0.025	1.8	0.025
BGIOSGA000361	4664	2550	5652	3294	3519	0	1	0	1	0	1
BGIOSGA000362	330	415	204	367	506	3.04951e-30	1	3.04951e-30	1	2.33814e-52	1
BGIOSGA000363	1344	1447	1351	1564	1343	1.01178e-173	1	1.01178e-173	1	9.84669e-187	1
BGIOSGA000364	441	341	329	294	341	4.11552e-46	1	4.11552e-46	1	2.64585e-38	1
BGIOSGA000365	0	0	0	0	0	1.8	0.025	1.8	0.025	1.8	0.025
BGIOSGA000366	1138	768	961	796	663	3.81403e-133	1	3.81403e-133	1	3.84959e-91	1
BGIOSGA000367	8	9	0	0	0	1.8	0.025	1.8	0.025	1.8	0.025
BGIOSGA000368	378	790	350	871	1083	2.14237e-44	1	2.14237e-44	1	5.09802e-123	1
BGIOSGA000369	8681	3236	7854	4778	2825	0	1	0	1	0	1
BGIOSGA000370	7392	5704	7729	7639	7678	0	1	0	1	0	1
BGIOSGA000371	1291	642	924	709	660	8.64686e-138	1	8.64686e-138	1	6.34633e-86	1
BGIOSGA000372	1077	463	1072	507	814	1.91288e-137	1	1.91288e-137	1	3.09039e-78	1
BGIOSGA000373	1773	883	1639	1335	1411	3.02401e-221	1	3.02401e-221	1	5.57943e-177	1
BGIOSGA000374	3119	9036	4200	9116	8917	0	1	0	1	0	1
BGIOSGA000375	7349	15786	7376	18698	19133	0	1	0	1	0	1
BGIOSGA000376	4	1	10	17	14	0.527572	0.481378	0.527572	0.194908	0.0636323	0.880269
BGIOSGA000377	764	898	214	401	232	1.13027e-40	1	1.13027e-40	1	1.57197e-35	1
BGIOSGA000378	1135	109	269	239	11	1.39909e-53	1	1.39909e-53	1	0.0168928	0.956424
BGIOSGA000379	151	16	4	22	6	0.340663	0.608128	0.340663	0.931233	0.239561	0.690643
BGIOSGA000380	112	58	108	67	84	1.14797e-12	1	1.14797e-12	0.999993	1.81497e-08	1
BGIOSGA000381	434	589	326	476	769	1.56692e-45	1	1.56692e-45	1	1.95328e-73	1
BGIOSGA000382	8589	6055	9666	9641	18794	0	1	0	1	0	1
BGIOSGA000383	4137	2991	3967	5232	2948	0	1	0	1	0	1
BGIOSGA000384	5	6	2	60	16	0.943133	0.271899	0.943133	0.752885	0.00611886	0.98044
BGIOSGA000385	10	8	5	8	15	0.432445	0.542447	0.432445	0.619377	0.192267	0.734175
BGIOSGA000386	44	77	35	58	52	0.000202407	0.998808	0.000202407	0.999997	3.39468e-06	0.999964
BGIOSGA000387	0	0	2	1	6	1.8	0.025	1.8	0.025	1.18471	0.180878
BGIOSGA000388	0	0	2	0	0	1.8	0.025	1.8	0.025	1.8	0.025
BGIOSGA000389	424	345	604	429	372	9.1077e-62	1	9.1077e-62	1	6.89986e-49	1
BGIOSGA000390	8977	5552	14257	5817	3799	0	1	0	1	0	1
BGIOSGA000391	611	924	386	743	843	1.63359e-58	1	1.63359e-58	1	7.33181e-100	1
BGIOSGA000392	4118	229	3289	504	11	0	1	0	1	0.0150057	0.96027
BGIOSGA000393	2518	808	4465	1748	831	0	1	0	1	2.45087e-144	1
BGIOSGA000394	924	248	521	556	546	1.17284e-83	1	1.17284e-83	1	1.30662e-68	1
BGIOSGA000395	2152	1168	316	2220	1426	1.2587e-68	1	1.2587e-68	1	1.09528e-225	1
BGIOSGA000396	220	213	192	108	204	2.44902e-24	1	2.44902e-24	1	1.86936e-16	1
BGIOSGA000397	133	501	141	359	395	6.33836e-16	1	6.33836e-16	1	5.08147e-46	1
BGIOSGA000398	237	282	202	201	269	5.72736e-26	1	5.72736e-26	1	1.80903e-27	1
BGIOSGA000399	3174	5532	4673	5139	5278	0	1	0	1	0	1
BGIOSGA000400	250	273	523	220	266	3.54486e-41	1	3.54486e-41	1	8.09468e-29	1
BGIOSGA000401	96	37	70	53	26	3.21476e-09	1	3.21476e-09	0.999556	0.000569303	0.997175
BGIOSGA000402	1838	1733	1742	1720	1611	1.12898e-232	1	1.12898e-232	1	6.11595e-216	1
BGIOSGA000403	219	140	180	60	43	2.07888e-23	1	2.07888e-23	1	1.16807e-05	0.999894
BGIOSGA000404	995	361	360	483	345	1.01621e-65	1	1.01621e-65	1	2.09407e-49	1
BGIOSGA000405	364	269	268	271	300	2.08903e-37	1	2.08903e-37	1	2.29233e-34	1
BGIOSGA000406	2457	2498	1975	3211	3566	1.66215e-286	1	1.66215e-286	1	0	1
BGIOSGA000407	2205	1775	1955	2032	2301	9.64691e-271	1	9.64691e-271	1	2.97924e-282	1
BGIOSGA000408	0	0	0	0	0	1.8	0.025	1.8	0.025	1.8	0.025
BGIOSGA000409	0	0	0	0	0	1.8	0.025	1.8	0.025	1.8	0.025
BGIOSGA000410	2314	4750	594	2160	1142	2.35505e-120	1	2.35505e-120	1	2.86666e-193	1
BGIOSGA000411	0	0	0	2	2	1.8	0.025	1.8	0.025	1.11896	0.203818
BGIOSGA000412	2692	3208	2128	2448	2972	0	1	0	1	0	1
BGIOSGA000413	3813	7645	1976	8215	6345	0	1	0	1	0	1
BGIOSGA000414	0	1	0	0	0	1.8	0.025	1.8	0.025	1.8	0.025
BGIOSGA000415	0	1	0	0	0	1.8	0.025	1.8	0.025	1.8	0.025
BGIOSGA000416	551	421	827	499	452	5.1981e-83	1	5.1981e-83	1	1.13339e-58	1
BGIOSGA000417	0	0	0	0	0	1.8	0.025	1.8	0.025	1.8	0.025
BGIOSGA000418	2	0	0	1	2	1.8	0.025	1.8	0.025	1.27917	0.150155
BGIOSGA000419	0	0	2	0	0	1.8	0.025	1.8	0.025	1.8	0.025
BGIOSGA000420	1044	2297	658	2277	1938	3.79608e-102	1	3.79608e-102	1	1.29537e-273	1
BGIOSGA000421	788	677	515	672	555	5.51343e-78	1	5.51343e-78	1	4.96866e-76	1
BGIOSGA000422	32	183	163	223	88	4.81791e-06	0.999951	4.81791e-06	1	1.26047e-14	1
BGIOSGA000423	666	711	304	803	552	2.4952e-51	1	2.4952e-51	1	4.41882e-82	1
BGIOSGA000424	17	13	6	3	18	0.270411	0.66411	0.270411	0.423566	0.593664	0.442403
BGIOSGA000425	2095	1488	1494	1297	1989	1.04038e-226	1	1.04038e-226	1	1.98941e-203	1
BGIOSGA000426	1469	2319	491	1753	1191	8.66415e-93	1	8.66415e-93	1	3.63056e-183	1
BGIOSGA000427	1109	1284	958	1397	1144	2.76684e-131	1	2.76684e-131	1	8.50482e-162	1
BGIOSGA000428	755	2365	843	3177	3491	9.55805e-101	1	9.55805e-101	1	0	1
BGIOSGA000429	3080	4380	3246	6037	5016	0	1	0	1	0	1
BGIOSGA000430	1495	857	3038	1159	1104	1.57128e-261	1	1.57128e-261	1	6.47349e-145	1
BGIOSGA000431	681	1150	732	953	1000	8.4439e-89	1	8.4439e-89	1	2.12808e-124	1
BGIOSGA000432	1657	483	1046	555	534	4.62606e-165	1	4.62606e-165	1	9.58611e-68	1
BGIOSGA000433	4	17	4	28	15	0.749572	0.359719	0.749572	0.95741	0.0240719	0.942667
BGIOSGA000434	45	8	27	11	5	0.000756549	0.996425	0.000756549	0.68297	0.413897	0.555134
BGIOSGA000435	20	104	96	218	230	0.000889057	0.995916	0.000889057	1	1.09641e-26	1
BGIOSGA000436	122	84	102	107	64	8.36628e-13	1	8.36628e-13	1	4.06744e-09	1
BGIOSGA000437	119	8	88	4	2	1.29446e-11	1	1.29446e-11	0.455582	0.979689	0.256893
BGIOSGA000438	10398	3587	9791	5549	4658	0	1	0	1	0	1
BGIOSGA000439	5927	1500	5415	2687	1821	0	1	0	1	5.90285e-284	1
BGIOSGA000440	73	162	101	76	48	1.15349e-09	1	1.15349e-09	1	1.18664e-06	0.999985
BGIOSGA000441	22	220	211	303	185	0.000162794	0.999007	0.000162794	1	1.9999e-27	1
BGIOSGA000442	363	1291	283	870	1204	1.35362e-38	1	1.35362e-38	1	6.43021e-129	1
BGIOSGA000443	887	662	838	810	694	2.47477e-109	1	2.47477e-109	1	2.65998e-94	1
BGIOSGA000444	796	839	647	798	903	7.04932e-90	1	7.04932e-90	1	2.04111e-107	1
BGIOSGA000445	3071	3980	3243	4855	3987	0	1	0	1	0	1
BGIOSGA000446	799	386	594	287	215	1.23456e-85	1	1.23456e-85	1	1.89434e-29	1
BGIOSGA000447	641	492	518	375	260	1.78264e-71	1	1.78264e-71	1	3.35939e-37	1
BGIOSGA000448	348	618	257	418	514	9.51907e-36	1	9.51907e-36	1	5.91416e-57	1
BGIOSGA000449	347	236	603	181	247	2.66276e-54	1	2.66276e-54	1	8.07232e-25	1
BGIOSGA000450	1489	1677	1438	2458	1711	3.95883e-189	1	3.95883e-189	1	2.28275e-263	1
BGIOSGA000451	371	690	236	389	483	7.72961e-35	1	7.72961e-35	1	4.5717e-53	1
BGIOSGA000452	34	333	50	533	213	0.000138674	0.999132	0.000138674	1	7.4472e-37	1
BGIOSGA000453	1106	979	976	1015	1128	1.80362e-132	1	1.80362e-132	1	1.18371e-136	1
BGIOSGA000454	0	0	0	0	0	1.8	0.025	1.8	0.025	1.8	0.025
BGIOSGA000455	1890	771	1773	968	442	3.71422e-238	1	3.71422e-238	1	6.77796e-76	1
BGIOSGA000456	628	1302	287	1048	1352	2.62329e-48	1	2.62329e-48	1	1.53079e-151	1
BGIOSGA000457	3837	5034	4223	6376	6574	0	1	0	1	0	1
BGIOSGA000458	345	146	224	141	108	1.05308e-32	1	1.05308e-32	1	3.72511e-14	1
BGIOSGA000459	247	59	125	52	42	1.71009e-19	1	1.71009e-19	0.999967	2.98744e-05	0.999764
BGIOSGA000460	785	380	578	481	381	1.37245e-83	1	1.37245e-83	1	2.50668e-52	1
BGIOSGA000461	862	985	855	779	1281	6.7735e-109	1	6.7735e-109	1	1.84778e-123	1
BGIOSGA000462	111	13	75	8	10	3.15313e-10	1	3.15313e-10	0.711909	0.269284	0.665056
BGIOSGA000463	1106	1622	676	1560	1733	2.40905e-106	1	2.40905e-106	1	4.98055e-213	1
BGIOSGA000464	168	249	115	237	227	6.98471e-16	1	6.98471e-16	1	1.07188e-27	1
BGIOSGA000465	1209	1417	1185	1747	1824	1.10119e-153	1	1.10119e-153	1	3.92911e-232	1
BGIOSGA000466	6463	8433	10706	8685	7519	0	1	0	1	0	1
BGIOSGA000467	0	0	0	0	0	1.8	0.025	1.8	0.025	1.8	0.025
BGIOSGA000468	5540	3414	3532	4497	3155	0	1	0	1	0	1
BGIOSGA000469	15	186	17	130	50	0.0556586	0.891638	0.0556586	1	3.38328e-08	0.999999
BGIOSGA000470	0	0	0	0	0	1.8	0.025	1.8	0.025	1.8	0.025
BGIOSGA000471	1	0	0	0	1	1.8	0.025	1.8	0.025	1.8	0.025
BGIOSGA000472	917	659	788	577	460	1.82959e-107	1	1.82959e-107	1	1.5436e-63	1
BGIOSGA000473	8	10	27	7	23	0.125926	0.80288	0.125926	0.631902	0.180042	0.746083
BGIOSGA000474	914	895	926	1161	1098	5.28112e-117	1	5.28112e-117	1	1.27168e-144	1
BGIOSGA000475	2359	2288	2674	1924	2147	0	1	0	1	5.91558e-265	1
BGIOSGA000476	1387	1684	1690	1704	1200	3.29478e-197	1	3.29478e-197	1	8.05112e-182	1
BGIOSGA000477	1324	795	1054	877	1044	1.33192e-150	1	1.33192e-150	1	2.12513e-121	1
BGIOSGA000478	19550	64354	15273	48963	37446	0	1	0	1	0	1
BGIOSGA000479	1000	1249	1221	1453	1319	9.25376e-141	1	9.25376e-141	1	2.02104e-178	1
BGIOSGA000480	356	595	267	339	344	5.93474e-37	1	5.93474e-37	1	1.38762e-41	1
BGIOSGA000481	603	589	356	755	450	3.14892e-55	1	3.14892e-55	1	2.70443e-70	1
BGIOSGA000482	4490	2970	2507	4012	1929	0	1	0	1	0	1
BGIOSGA000483	0	0	0	0	0	1.8	0.025	1.8	0.025	1.8	0.025
BGIOSGA000484	0	0	0	0	0	1.8	0.025	1.8	0.025	1.8	0.025
BGIOSGA000485	292	412	357	311	292	5.29722e-39	1	5.29722e-39	1	1.88116e-36	1
BGIOSGA000486	358	731	461	890	605	1.79355e-49	1	1.79355e-49	1	9.82632e-91	1
BGIOSGA000487	31	189	71	405	656	6.99551e-05	0.999513	6.99551e-05	1	4.23072e-62	1
BGIOSGA000488	325	221	190	345	207	1.08666e-28	1	1.08666e-28	1	4.46742e-31	1
BGIOSGA000489	79	1	9	0	1	0.0528879	0.8957	0.0528879	0.025	1.8	0.025
BGIOSGA000490	267	375	406	456	417	4.06716e-39	1	4.06716e-39	1	1.13407e-53	1
BGIOSGA000491	12	9	45	6	15	0.0276387	0.936241	0.0276387	0.574434	0.288366	0.649252
BGIOSGA000492	3133	2874	3222	2432	2104	0	1	0	1	1.98452e-295	1
BGIOSGA000493	34	69	19	53	61	0.00758091	0.976802	0.00758091	0.999989	2.07204e-06	0.999976
BGIOSGA000494	885	890	904	723	871	1.24712e-113	1	1.24712e-113	1	6.73225e-100	1
BGIOSGA000495	674	492	747	568	565	3.36856e-89	1	3.36856e-89	1	1.24242e-70	1
BGIOSGA000496	1942	2188	1432	2233	2374	6.729e-214	1	6.729e-214	1	1.64581e-301	1
BGIOSGA000497	948	1319	1167	1453	1427	1.08435e-133	1	1.08435e-133	1	4.88873e-186	1
BGIOSGA000498	324	1691	1024	1170	1302	5.44208e-61	1	5.44208e-61	1	2.04693e-158	1
BGIOSGA000499	36	16	9	7	7	0.0791452	0.859317	0.0791452	0.704649	0.403128	0.562628
BGIOSGA000500	3631	740	2358	1048	682	0	1	0	1	1.17982e-104	1
BGIOSGA000501	1148	1210	1072	1168	1415	5.58559e-142	1	5.58559e-142	1	1.07526e-164	1
BGIOSGA000502	98	43	659	194	199	4.5878e-20	1	4.5878e-20	0.999999	2.87041e-23	1
BGIOSGA000503	0	0	0	1	0	1.8	0.025	1.8	0.025	1.8	0.025
BGIOSGA000504	21	10	16	11	2	0.0332192	0.926612	0.0332192	0.735853	0.848581	0.312958
BGIOSGA000505	0	1	1	2	0	1.8	0.025	1.8	0.150155	1.8	0.025
BGIOSGA000506	28	16	47	19	8	0.000540468	0.997294	0.000540468	0.915579	0.160289	0.765985
BGIOSGA000507	254	134	302	183	204	3.01491e-33	1	3.01491e-33	1	7.90656e-23	1
BGIOSGA000509	145	24	32	54	37	6.36667e-06	0.999937	6.36667e-06	0.996022	5.7646e-05	0.999587
BGIOSGA000510	152	319	215	210	297	5.47742e-21	1	5.47742e-21	1	1.78825e-29	1
BGIOSGA000511	1316	4329	1457	3342	3925	1.9277e-178	1	1.9277e-178	1	0	1
BGIOSGA000512	444	380	361	372	100	7.43148e-49	1	7.43148e-49	1	1.83232e-18	1
BGIOSGA000513	887	884	538	1040	1185	4.13619e-84	1	4.13619e-84	1	7.40604e-142	1
BGIOSGA000514	1176	1825	808	1804	2016	5.19504e-122	1	5.19504e-122	1	3.83264e-248	1
BGIOSGA000515	1554	1888	2935	2729	2504	2.58178e-265	1	2.58178e-265	1	0	1
BGIOSGA000516	5	13	5	17	17	0.61135	0.432401	0.61135	0.866975	0.0435403	0.90989
BGIOSGA000517	2939	5366	3066	4467	3991	0	1	0	1	0	1
BGIOSGA000518	12926	3177	5425	3208	4010	0	1	0	1	0	1
BGIOSGA000519	5047	4026	3885	7853	4858	0	1	0	1	0	1
BGIOSGA000520	11079	3468	8872	4499	3506	0	1	0	1	0	1
BGIOSGA000521	353	130	239	145	122	2.12479e-34	1	2.12479e-34	1	2.15975e-15	1
BGIOSGA000522	330	241	289	215	233	2.46616e-37	1	2.46616e-37	1	1.16182e-26	1
BGIOSGA000523	246	256	145	325	168	1.57851e-21	1	1.57851e-21	1	2.15202e-26	1
BGIOSGA000524	14	79	8	59	72	0.203242	0.72373	0.203242	0.999998	2.41606e-07	0.999996
BGIOSGA000525	0	0	0	0	0	1.8	0.025	1.8	0.025	1.8	0.025
BGIOSGA000526	3419	4108	2485	4342	3754	0	1	0	1	0	1
BGIOSGA000527	859	903	676	1724	878	1.71694e-95	1	1.71694e-95	1	3.01574e-149	1
BGIOSGA000528	0	0	0	1	1	1.8	0.025	1.8	0.025	1.36961	0.123109
BGIOSGA000529	0	0	0	0	1	1.8	0.025	1.8	0.025	1.8	0.025
BGIOSGA000530	23	12	48	10	5	0.00146342	0.99385	0.00146342	0.752885	0.432445	0.542447
BGIOSGA000531	1576	893	2638	1444	1157	2.07974e-257	1	2.07974e-257	1	2.34126e-165	1
BGIOSGA000532	8589	8829	8402	9536	7142	0	1	0	1	0	1
BGIOSGA000533	2	11	26	1	8	0.794112	0.338179	0.794112	0.190448	1.16975	0.185984
BGIOSGA000534	574	803	598	796	1031	3.85768e-73	1	3.85768e-73	1	3.71448e-114	1
BGIOSGA000535	98	41	138	38	18	3.1698e-13	1	3.1698e-13	0.998918	0.00748775	0.977029
BGIOSGA000536	6369	11917	7498	12270	13961	0	1	0	1	0	1
BGIOSGA000537	4165	5525	4397	6474	8144	0	1	0	1	0	1
BGIOSGA000538	0	0	0	0	3	1.8	0.025	1.8	0.025	1.8	0.025
BGIOSGA000539	17263	22227	22786	22089	22364	0	1	0	1	0	1
BGIOSGA000540	633	871	769	1141	1167	2.459e-87	1	2.459e-87	1	5.69905e-148	1
BGIOSGA000541	0	0	0	0	0	1.8	0.025	1.8	0.025	1.8	0.025
BGIOSGA000542	1783	1565	1598	1564	1387	7.58786e-219	1	7.58786e-219	1	4.41875e-190	1
BGIOSGA000543	7646	8566	7260	8574	6112	0	1	0	1	0	1
BGIOSGA000544	6526	9580	4996	9826	10645	0	1	0	1	0	1
BGIOSGA000545	11	15	2	3	6	0.848581	0.312958	0.848581	0.432401	0.749572	0.359719
BGIOSGA000546	439	2343	493	2748	1676	2.1629e-57	1	2.1629e-57	1	4.905e-272	1
BGIOSGA000547	1644	1265	1526	1311	1250	4.0344e-205	1	4.0344e-205	1	1.04819e-164	1
BGIOSGA000548	3828	4105	3733	4408	3391	0	1	0	1	0	1
BGIOSGA000549	1085	1012	1001	914	1021	4.76262e-133	1	4.76262e-133	1	6.8235e-123	1
BGIOSGA000550	4	22	7	32	105	0.60004	0.438778	0.60004	0.983289	1.53218e-05	0.999867
BGIOSGA000551	33	40	34	50	37	0.000806799	0.99623	0.000806799	0.999632	8.21518e-05	0.999442
BGIOSGA000552	14	15	2	11	4	0.82913	0.321827	0.82913	0.813665	0.511143	0.491482
BGIOSGA000553	878	1357	1270	1801	501	1.21731e-132	1	1.21731e-132	1	4.39918e-99	1
BGIOSGA000554	2251	2132	2131	2316	2030	1.90072e-286	1	1.90072e-286	1	5.53275e-283	1
BGIOSGA000555	1716	2070	1338	2402	1888	1.53106e-194	1	1.53106e-194	1	2.39631e-276	1
BGIOSGA000556	17	77	21	40	52	0.0286819	0.934404	0.0286819	0.99994	4.12264e-05	0.999689
BGIOSGA000557	95	20	32	19	21	2.07797e-05	0.999827	2.07797e-05	0.942169	0.0218268	0.94684
BGIOSGA000558	1	0	3	4	2	1.23681	0.163616	1.23681	0.025	0.979689	0.256893
BGIOSGA000559	0	0	0	0	1	1.8	0.025	1.8	0.025	1.8	0.025
BGIOSGA000560	601	595	320	701	1474	2.3645e-51	1	2.3645e-51	1	5.46389e-121	1
BGIOSGA000561	1573	1392	1171	1196	993	4.60033e-173	1	4.60033e-173	1	7.5458e-139	1
BGIOSGA000562	623	562	715	709	661	1.34961e-83	1	1.34961e-83	1	5.39935e-86	1
BGIOSGA000563	814	645	701	841	591	4.66452e-95	1	4.66452e-95	1	2.63272e-87	1
BGIOSGA000564	494	252	1264	296	525	1.98886e-89	1	1.98886e-89	1	2.48498e-46	1
BGIOSGA000565	0	0	1	0	0	1.8	0.025	1.8	0.025	1.8	0.025
BGIOSGA000566	1345	793	270	284	206	1.72213e-55	1	1.72213e-55	1	1.45732e-28	1
BGIOSGA000567	1550	1643	1553	1914	1676	6.15007e-201	1	6.15007e-201	1	1.85051e-232	1
BGIOSGA000568	7	22	0	2	0	1.8	0.025	1.8	0.334559	1.8	0.025
BGIOSGA000569	661	239	298	591	140	1.7926e-50	1	1.7926e-50	1	5.27487e-27	1
BGIOSGA000570	0	0	0	0	0	1.8	0.025	1.8	0.025	1.8	0.025
BGIOSGA000571	4003	3419	4535	3078	3066	0	1	0	1	0	1
BGIOSGA000572	58	162	62	96	331	8.89185e-07	0.999989	8.89185e-07	1	2.19749e-17	1
BGIOSGA000573	337	98	219	67	47	6.31781e-32	1	6.31781e-32	1	3.04968e-06	0.999967
BGIOSGA000574	0	0	0	0	0	1.8	0.025	1.8	0.025	1.8	0.025
BGIOSGA000575	52	11	34	11	2	0.000117816	0.999244	0.000117816	0.756343	0.848581	0.312958
BGIOSGA000576	25923	7450	22791	5692	5847	0	1	0	1	0	1
BGIOSGA000577	48	15	20	9	10	0.0029644	0.989076	0.0029644	0.765646	0.237222	0.69271
BGIOSGA000578	0	0	7	5	3	1.8	0.025	1.8	0.025	0.788412	0.340888
BGIOSGA000579	2288	1503	2548	1989	1619	0	1	0	1	3.51786e-232	1
BGIOSGA000580	2788	2180	2340	2377	1379	0	1	0	1	7.11546e-227	1
BGIOSGA000581	2952	5455	2772	4460	4554	0	1	0	1	0	1
BGIOSGA000582	2048	1915	2061	1782	2081	2.53008e-268	1	2.53008e-268	1	2.9023e-250	1
BGIOSGA000583	45	105	103	229	33	4.35324e-07	0.999994	4.35324e-07	1	1.6068e-06	0.999981
BGIOSGA000584	0	0	0	0	0	1.8	0.025	1.8	0.025	1.8	0.025
BGIOSGA000585	5	38	1	16	16	1.19607	0.177046	1.19607	0.966978	0.0548632	0.892798
BGIOSGA000586	0	0	11	45	39	1.8	0.025	1.8	0.025	9.93238e-05	0.999345
BGIOSGA000587	9596	11038	9299	11341	10352	0	1	0	1	0	1
BGIOSGA000588	375	290	151	134	210	1.28308e-25	1	1.28308e-25	1	3.36918e-19	1
BGIOSGA000589	180	14	111	20	7	5.60787e-16	1	5.60787e-16	0.901177	0.195007	0.731546
BGIOSGA000590	30	11	21	21	11	0.0070025	0.978221	0.0070025	0.860197	0.0784724	0.860197
BGIOSGA000591	1624	696	1023	688	660	1.90493e-161	1	1.90493e-161	1	1.2595e-84	1
BGIOSGA000592	1083	751	1101	702	959	9.35753e-140	1	9.35753e-140	1	1.36002e-102	1
BGIOSGA000593	4002	3124	3427	3044	3855	0	1	0	1	0	1
BGIOSGA000594	367	291	163	187	126	6.33628e-27	1	6.33628e-27	1	1.3518e-17	1
BGIOSGA000595	355	625	502	672	664	3.96114e-51	1	3.96114e-51	1	7.08557e-84	1
BGIOSGA000596	10	5	22	8	5	0.0917328	0.843252	0.0917328	0.510183	0.48147	0.510183
BGIOSGA000597	10001	14995	6460	16609	12807	0	1	0	1	0	1
BGIOSGA000598	531	1241	787	697	293	1.87929e-79	1	1.87929e-79	1	1.06128e-50	1
BGIOSGA000599	11	31	4	28	18	0.511143	0.491482	0.511143	0.991381	0.0136966	0.963008
BGIOSGA000600	97	109	40	139	108	2.11434e-06	0.999976	2.11434e-06	1	4.60142e-14	1
BGIOSGA000601	640	198	428	293	456	1.12499e-63	1	1.12499e-63	1	1.54296e-43	1
BGIOSGA000602	490	439	368	376	577	1.06387e-51	1	1.06387e-51	1	3.27467e-56	1
BGIOSGA000603	10517	7968	8853	8104	3976	0	1	0	1	0	1
BGIOSGA000604	927	470	431	358	533	1.7338e-73	1	1.7338e-73	1	9.94727e-53	1
BGIOSGA000605	5767	5125	6535	8757	6357	0	1	0	1	0	1
BGIOSGA000606	112	56	115	58	72	4.33605e-13	1	4.33605e-13	0.999978	2.83996e-07	0.999996
BGIOSGA000607	1501	1262	617	2012	1712	5.21691e-111	1	5.21691e-111	1	7.09578e-241	1
BGIOSGA000608	282	4	136	156	322	1.1707e-21	1	1.1707e-21	0.608483	5.61187e-25	1
BGIOSGA000609	2	3	6	2	15	0.91658	0.283096	0.91658	0.235755	0.824239	0.324081
BGIOSGA000610	0	0	0	0	0	1.8	0.025	1.8	0.025	1.8	0.025
BGIOSGA000611	0	0	0	0	0	1.8	0.025	1.8	0.025	1.8	0.025
BGIOSGA000612	1581	2021	1499	1597	1929	2.9562e-199	1	2.9562e-199	1	3.89035e-227	1
BGIOSGA000613	550	620	654	596	682	1.13324e-74	1	1.13324e-74	1	1.03961e-79	1
BGIOSGA000614	7006	5673	5031	4788	4162	0	1	0	1	0	1
BGIOSGA000615	299	1281	219	865	797	2.49791e-30	1	2.49791e-30	1	4.30697e-105	1
BGIOSGA000616	0	0	0	0	2	1.8	0.025	1.8	0.025	1.8	0.025
BGIOSGA000617	2	0	1	0	0	1.27917	0.150155	1.27917	0.025	1.8	0.025
BGIOSGA000618	793	769	497	717	905	1.94709e-76	1	1.94709e-76	1	3.28417e-101	1
BGIOSGA000619	231	153	89	102	122	6.64107e-15	1	6.64107e-15	1	8.36628e-13	1
BGIOSGA000620	123	124	247	262	248	2.82828e-19	1	2.82828e-19	1	1.40374e-30	1
BGIOSGA000621	932	971	768	978	1409	9.79038e-107	1	9.79038e-107	1	4.55168e-148	1
BGIOSGA000622	474	257	91	151	189	7.40681e-18	1	7.40681e-18	1	1.0022e-19	1
BGIOSGA000623	860	1819	806	1519	1612	2.00881e-105	1	2.00881e-105	1	1.26684e-202	1
BGIOSGA000624	840	3166	943	5306	4534	7.4254e-113	1	7.4254e-113	1	0	1
BGIOSGA000625	108	140	96	127	165	1.13804e-11	1	1.13804e-11	1	9.79837e-17	1
BGIOSGA000626	156	123	205	195	292	7.11537e-21	1	7.11537e-21	1	6.10456e-28	1
BGIOSGA000627	13	3	14	5	1	0.097478	0.836159	0.097478	0.340888	1.19607	0.177046
BGIOSGA000628	1355	3480	2007	3382	3371	8.52046e-210	1	8.52046e-210	1	0	1
BGIOSGA000629	2015	1485	1548	1158	1144	1.31188e-227	1	1.31188e-227	1	1.38114e-147	1
BGIOSGA000630	1460	1540	1033	1531	1226	2.03041e-155	1	2.03041e-155	1	1.32299e-175	1
BGIOSGA000631	6373	8753	4597	8836	5753	0	1	0	1	0	1
BGIOSGA000632	1756	167	602	343	227	6.35722e-114	1	6.35722e-114	1	6.68176e-33	1
BGIOSGA000633	2582	384	641	832	509	3.69899e-131	1	3.69899e-131	1	4.03152e-79	1
BGIOSGA000634	0	0	75	0	0	1.8	0.025	1.8	0.025	1.8	0.025
BGIOSGA000635	849	0	1136	2	0	7.6015e-124	1	7.6015e-124	0.025	1.8	0.025
BGIOSGA000636	0	0	3	5	6	1.8	0.025	1.8	0.025	0.556715	0.463871
BGIOSGA000637	0	0	0	1	5	1.8	0.025	1.8	0.025	1.19607	0.177046
BGIOSGA000638	6397	4469	7479	5350	3293	0	1	0	1	0	1
BGIOSGA000639	230	208	117	152	85	3.74407e-18	1	3.74407e-18	1	1.48625e-12	1
BGIOSGA000640	102	199	140	166	211	1.23119e-13	1	1.23119e-13	1	6.04949e-22	1
BGIOSGA000641	998	2340	799	2275	1775	1.01943e-112	1	1.01943e-112	1	3.20054e-260	1
BGIOSGA000642	3226	1856	2357	2807	1463	0	1	0	1	9.6748e-251	1
BGIOSGA000643	89	38	69	13	16	7.68914e-09	1	7.68914e-09	0.940955	0.0801454	0.858012
BGIOSGA000644	525	583	565	757	1015	9.67682e-68	1	9.67682e-68	1	4.78661e-110	1
BGIOSGA000645	1230	1550	1282	1814	1635	1.79716e-161	1	1.79716e-161	1	1.87859e-223	1
BGIOSGA000646	1	0	0	0	0	1.8	0.025	1.8	0.025	1.8	0.025
BGIOSGA000647	0	0	2	0	0	1.8	0.025	1.8	0.025	1.8	0.025
BGIOSGA000648	0	0	0	0	0	1.8	0.025	1.8	0.025	1.8	0.025
BGIOSGA000649	90	33	50	64	12	2.81029e-07	0.999996	2.81029e-07	0.999553	0.0205236	0.949312
BGIOSGA000650	82	19	60	35	16	7.40251e-08	0.999999	7.40251e-08	0.977899	0.0135414	0.963337
BGIOSGA000651	5	7	2	2	2	0.943133	0.271899	0.943133	0.291767	1.11896	0.203818
BGIOSGA000652	967	767	979	469	827	5.25808e-124	1	5.25808e-124	1	8.27899e-75	1
BGIOSGA000653	18	31	12	34	43	0.0791452	0.859317	0.0791452	0.995312	0.000261608	0.998522
BGIOSGA000654	679	567	650	747	689	2.22079e-83	1	2.22079e-83	1	2.83173e-90	1
BGIOSGA000655	474	492	400	513	489	1.91343e-53	1	1.91343e-53	1	4.35626e-62	1
BGIOSGA000656	0	0	0	0	0	1.8	0.025	1.8	0.025	1.8	0.025
BGIOSGA000657	2183	3679	2268	3071	2685	3.37318e-291	1	3.37318e-291	1	0	1
BGIOSGA000658	451	1060	1064	1384	1296	2.28799e-79	1	2.28799e-79	1	1.56778e-172	1
BGIOSGA000659	568	618	2659	994	696	3.96919e-119	1	3.96919e-119	1	1.1656e-103	1
BGIOSGA000660	43	33	89	90	16	1.48573e-06	0.999982	1.48573e-06	0.999842	0.00384765	0.986516
BGIOSGA000661	20	14	10	13	9	0.100795	0.832126	0.100795	0.836159	0.183929	0.742264
BGIOSGA000662	1587	1780	1390	1495	1720	1.17973e-191	1	1.17973e-191	1	2.27595e-207	1
BGIOSGA000663	1122	1010	1040	844	846	4.22245e-138	1	4.22245e-138	1	4.05143e-107	1
BGIOSGA000664	1	0	0	0	0	1.8	0.025	1.8	0.025	1.8	0.025
BGIOSGA000665	0	0	0	0	0	1.8	0.025	1.8	0.025	1.8	0.025
BGIOSGA000666	28	27	23	20	43	0.00613111	0.980409	0.00613111	0.969723	0.00372575	0.986861
BGIOSGA000667	7	0	2	6	17	0.896423	0.291767	0.896423	0.025	0.270411	0.66411
BGIOSGA000668	319	405	285	380	453	1.96993e-36	1	1.96993e-36	1	8.53889e-51	1
BGIOSGA000669	86	190	5	32	54	0.238419	0.691651	0.238419	0.999963	0.000149296	0.999077
BGIOSGA000670	464	1111	345	994	1073	1.54501e-48	1	1.54501e-48	1	8.15962e-132	1
BGIOSGA000671	0	0	0	0	0	1.8	0.025	1.8	0.025	1.8	0.025
BGIOSGA000672	68	124	57	81	82	5.12856e-07	0.999993	5.12856e-07	1	2.78306e-09	1
BGIOSGA000673	0	1	0	6	4	1.8	0.025	1.8	0.180878	0.636936	0.41823
BGIOSGA000674	789	909	559	804	660	4.25442e-82	1	4.25442e-82	1	2.46213e-91	1
BGIOSGA000675	0	0	0	0	0	1.8	0.025	1.8	0.025	1.8	0.025
BGIOSGA000676	4	3	5	6	2	0.684895	0.392573	0.684895	0.359719	0.91658	0.283096
BGIOSGA000677	158	208	343	266	196	9.51274e-26	1	9.51274e-26	1	6.41476e-27	1
BGIOSGA000678	0	0	0	0	0	1.8	0.025	1.8	0.025	1.8	0.025
BGIOSGA000679	2945	5784	2653	4108	3693	0	1	0	1	0	1
BGIOSGA000680	226	107	80	116	154	1.1798e-13	1	1.1798e-13	1	2.27357e-15	1
BGIOSGA000681	4	5	0	1	0	1.8	0.025	1.8	0.177046	1.8	0.025
BGIOSGA000682	485	226	249	327	274	5.34337e-40	1	5.34337e-40	1	4.57388e-36	1
BGIOSGA000683	438	785	569	718	616	2.41049e-61	1	2.41049e-61	1	3.07744e-83	1
BGIOSGA000684	1701	1017	1098	966	662	5.35993e-172	1	5.35993e-172	1	2.63865e-99	1
BGIOSGA000685	4	2	4	2	0	0.749572	0.359719	0.749572	0.203818	1.8	0.025
BGIOSGA000686	192	71	110	93	44	2.74207e-16	1	2.74207e-16	1	9.36397e-07	0.999988
BGIOSGA000687	10	3	4	0	5	0.527572	0.481378	0.527572	0.025	1.8	0.025
BGIOSGA000688	0	2	0	0	0	1.8	0.025	1.8	0.025	1.8	0.025
BGIOSGA000689	73	181	182	156	168	5.62939e-12	1	5.62939e-12	1	5.65553e-19	1
BGIOSGA000690	1564	1250	3025	1652	1592	2.52576e-269	1	2.52576e-269	1	2.75515e-210	1
BGIOSGA000691	644	611	349	487	764	7.14334e-56	1	7.14334e-56	1	2.52994e-74	1
BGIOSGA000692	391	770	498	723	811	5.50769e-54	1	5.50769e-54	1	1.58234e-96	1
BGIOSGA000693	1641	1762	3298	2625	2621	9.65746e-287	1	9.65746e-287	1	0	1
BGIOSGA000694	0	4	0	0	1	1.8	0.025	1.8	0.025	1.8	0.025
BGIOSGA000695	0	0	0	0	0	1.8	0.025	1.8	0.025	1.8	0.025
BGIOSGA000696	1	0	0	1	0	1.8	0.025	1.8	0.025	1.8	0.025
BGIOSGA000697	30	51	17	53	43	0.0144031	0.961523	0.0144031	0.999931	2.30124e-05	0.999811
BGIOSGA000698	1902	972	1802	1190	805	5.65748e-241	1	5.65748e-241	1	2.44268e-122	1
BGIOSGA000699	164	217	112	118	128	1.82976e-15	1	1.82976e-15	1	3.25568e-14	1
BGIOSGA000700	0	0	0	0	0	1.8	0.025	1.8	0.025	1.8	0.025
BGIOSGA000701	0	0	1	1	0	1.8	0.025	1.8	0.025	1.8	0.025
BGIOSGA000702	635	890	1639	1177	1122	2.13781e-116	1	2.13781e-116	1	2.63642e-147	1
BGIOSGA000703	22	34	14	4	11	0.0424322	0.911627	0.0424322	0.571967	0.511143	0.491482
BGIOSGA000704	230	146	256	175	265	5.27092e-29	1	5.27092e-29	1	4.69579e-25	1
BGIOSGA000705	0	0	0	0	0	1.8	0.025	1.8	0.025	1.8	0.025
BGIOSGA000706	3390	6582	2387	7818	5501	0	1	0	1	0	1
BGIOSGA000707	1	4	2	10	4	1.27917	0.150155	1.27917	0.481378	0.527572	0.481378
BGIOSGA000708	0	0	0	0	0	1.8	0.025	1.8	0.025	1.8	0.025
BGIOSGA000709	0	0	0	0	0	1.8	0.025	1.8	0.025	1.8	0.025
BGIOSGA000710	0	0	0	0	0	1.8	0.025	1.8	0.025	1.8	0.025
BGIOSGA000711	0	0	0	0	0	1.8	0.025	1.8	0.025	1.8	0.025
BGIOSGA000712	0	0	0	0	0	1.8	0.025	1.8	0.025	1.8	0.025
BGIOSGA000713	172	128	184	96	133	5.95763e-21	1	5.95763e-21	1	7.48159e-13	1
BGIOSGA000714	0	0	0	0	0	1.8	0.025	1.8	0.025	1.8	0.025
BGIOSGA000715	12	15	24	29	27	0.0548632	0.892798	0.0548632	0.945094	0.00316803	0.988473
BGIOSGA000716	249	297	644	135	190	7.65976e-44	1	7.65976e-44	1	1.72219e-18	1
BGIOSGA000717	485	395	474	352	312	2.48136e-59	1	2.48136e-59	1	3.20977e-40	1
BGIOSGA000718	330	345	151	249	343	1.32256e-24	1	1.32256e-24	1	7.61865e-35	1
BGIOSGA000719	1906	1978	2287	2612	2335	1.21375e-271	1	1.21375e-271	1	0	1
BGIOSGA000720	3364	2357	1080	880	870	4.15436e-212	1	4.15436e-212	1	4.54924e-111	1
BGIOSGA000721	983	1430	1040	1686	1514	5.37073e-129	1	5.37073e-129	1	8.41737e-207	1
BGIOSGA000722	0	0	0	0	0	1.8	0.025	1.8	0.025	1.8	0.025
BGIOSGA000723	1611	1443	1523	1816	1631	7.63528e-203	1	7.63528e-203	1	2.82141e-223	1
BGIOSGA000724	1234	5098	1477	13947	11820	2.44857e-173	1	2.44857e-173	1	0	1
BGIOSGA000725	4449	6085	3065	5675	4986	0	1	0	1	0	1
BGIOSGA000726	2579	3590	4139	6800	5565	0	1	0	1	0	1
BGIOSGA000727	5	2	0	7	1	1.8	0.025	1.8	0.291767	1.17627	0.183751
BGIOSGA000728	6783	397	1907	1731	935	0	1	0	1	5.55533e-156	1
BGIOSGA000729	29	19	16	14	20	0.0186177	0.953002	0.0186177	0.895015	0.049218	0.901177
BGIOSGA000730	682	935	383	699	767	9.09409e-61	1	9.09409e-61	1	3.45211e-92	1
BGIOSGA000731	293	748	200	486	840	1.98258e-28	1	1.98258e-28	1	4.73445e-77	1
BGIOSGA000732	16	99	26	572	883	0.0225627	0.945461	0.0225627	1	2.56595e-87	1
BGIOSGA000733	278	100	312	138	378	1.53548e-35	1	1.53548e-35	1	5.57025e-24	1
BGIOSGA000734	1115	2024	1155	2057	1950	2.01748e-145	1	2.01748e-145	1	2.75417e-261	1
BGIOSGA000735	136	125	127	114	115	2.9911e-15	1	2.9911e-15	1	3.27012e-13	1
BGIOSGA000736	220	22	13	7	6	0.00727247	0.977555	0.00727247	0.741643	0.451467	0.529718
BGIOSGA000737	1498	1338	1515	1631	1991	6.38481e-195	1	6.38481e-195	1	2.90868e-233	1
BGIOSGA000738	2975	5676	1888	5548	5748	1.12054e-302	1	1.12054e-302	1	0	1
BGIOSGA000739	292	862	163	631	550	7.40113e-25	1	7.40113e-25	1	2.13741e-73	1
BGIOSGA000740	0	0	0	0	0	1.8	0.025	1.8	0.025	1.8	0.025
BGIOSGA000741	404	147	592	163	131	1.94334e-59	1	1.94334e-59	1	6.01883e-17	1
BGIOSGA000742	533	443	337	462	418	9.55533e-51	1	9.55533e-51	1	4.29245e-54	1
BGIOSGA000743	1003	893	719	1451	1103	3.84201e-106	1	3.84201e-106	1	3.49346e-161	1
BGIOSGA000744	349	78	293	50	24	1.16517e-38	1	1.16517e-38	0.999991	0.00105081	0.995314
BGIOSGA000745	607	121	113	27	1	1.57111e-22	1	1.57111e-22	0.999608	1.13502	0.198092
BGIOSGA000746	2945	1597	2954	1922	1264	0	1	0	1	2.09613e-197	1
BGIOSGA000747	595	492	383	245	266	1.34861e-57	1	1.34861e-57	1	1.30143e-30	1
BGIOSGA000748	149	143	257	153	94	2.70132e-22	1	2.70132e-22	1	1.90059e-13	1
BGIOSGA000749	4	2	5	7	6	0.684895	0.392573	0.684895	0.291767	0.451467	0.529718
BGIOSGA000750	1429	379	815	455	298	1.30645e-132	1	1.30645e-132	1	5.71638e-44	1
BGIOSGA000751	6546	6730	3999	8563	8090	0	1	0	1	0	1
BGIOSGA000752	2662	1852	3299	2347	1741	0	1	0	1	6.93515e-261	1
BGIOSGA000753	3	2	25	0	2	0.568025	0.457216	0.568025	0.025	1.8	0.025
BGIOSGA000754	557	633	410	260	222	2.0636e-58	1	2.0636e-58	1	1.18653e-28	1
BGIOSGA000755	16	126	12	278	299	0.0924776	0.842325	0.0924776	1	8.61093e-35	1
BGIOSGA000756	62	78	66	40	32	3.08236e-07	0.999996	3.08236e-07	0.999943	0.000481257	0.997543
BGIOSGA000757	28	30	28	39	25	0.00314042	0.988554	0.00314042	0.996544	0.00171029	0.993014
BGIOSGA000758	648	206	565	166	165	1.78684e-75	1	1.78684e-75	1	1.96868e-19	1
BGIOSGA000759	208	210	279	188	172	1.6684e-28	1	1.6684e-28	1	3.51934e-21	1
BGIOSGA000760	126	196	193	234	293	7.88785e-18	1	7.88785e-18	1	2.93366e-31	1
BGIOSGA000761	134	101	81	110	41	1.37189e-11	1	1.37189e-11	1	9.36922e-07	0.999988
BGIOSGA000762	36	39	2	3	1	0.782157	0.343877	0.782157	0.471793	1.23681	0.163616
BGIOSGA000763	648	773	362	562	694	2.11747e-57	1	2.11747e-57	1	9.57797e-78	1
BGIOSGA000764	262	203	110	157	214	3.91138e-18	1	3.91138e-18	1	2.30962e-21	1
BGIOSGA000765	931	1225	1014	1506	1542	1.03788e-123	1	1.03788e-123	1	3.09255e-197	1
BGIOSGA000766	36440	4803	55110	8451	2855	0	1	0	1	0	1
BGIOSGA000767	238	1018	533	825	1839	5.33771e-40	1	5.33771e-40	1	5.30341e-146	1
BGIOSGA000768	2	3	2	3	4	1.11896	0.203818	1.11896	0.283096	0.841121	0.316342
BGIOSGA000769	1499	682	1238	954	747	7.3139e-175	1	7.3139e-175	1	3.48247e-106	1
BGIOSGA000770	608	218	237	259	182	1.57288e-41	1	1.57288e-41	1	1.99102e-25	1
BGIOSGA000771	23	6	21	60	25	0.0135616	0.963294	0.0135616	0.752885	0.000513911	0.997405
BGIOSGA000772	486	1551	402	1152	1030	3.07119e-54	1	3.07119e-54	1	3.51587e-139	1
BGIOSGA000773	2106	2525	2194	2136	2319	4.90435e-281	1	4.90435e-281	1	4.52264e-291	1
BGIOSGA000774	602	1053	736	1450	882	3.92825e-83	1	3.92825e-83	1	2.09601e-140	1
BGIOSGA000775	61	70	36	80	46	4.05851e-05	0.999693	4.05851e-05	1	1.32752e-06	0.999984
BGIOSGA000776	1494	3261	1187	4758	2694	1.89258e-170	1	1.89258e-170	1	0	1
BGIOSGA000777	0	0	0	0	1	1.8	0.025	1.8	0.025	1.8	0.025
BGIOSGA000778	62	240	14	191	83	0.0109677	0.968931	0.0109677	1	2.33276e-13	1
BGIOSGA000779	142	624	191	171	255	4.12037e-19	1	4.12037e-19	1	2.69264e-24	1
BGIOSGA000780	735	982	781	962	1109	1.38499e-95	1	1.38499e-95	1	1.37312e-131	1
BGIOSGA000781	174	308	122	269	113	1.00637e-16	1	1.00637e-16	1	1.19178e-18	1
BGIOSGA000782	18	11	14	19	16	0.0581126	0.88809	0.0581126	0.847939	0.0399423	0.915579
BGIOSGA000783	40932	55625	28867	42920	37451	0	1	0	1	0	1
BGIOSGA000784	1004	1198	1064	1375	1207	5.7655e-132	1	5.7655e-132	1	1.7942e-165	1
BGIOSGA000785	0	0	0	0	0	1.8	0.025	1.8	0.025	1.8	0.025
BGIOSGA000786	250	149	239	169	191	2.89233e-29	1	2.89233e-29	1	3.85188e-21	1
BGIOSGA000787	0	0	2	0	0	1.8	0.025	1.8	0.025	1.8	0.025
BGIOSGA000788	111	226	18	38	26	0.00150826	0.993696	0.00150826	0.999997	0.00154674	0.993565
BGIOSGA000789	2	1065	41	1497	753	0.778301	0.345728	0.778301	1	7.61721e-128	1
BGIOSGA000790	908	845	1768	996	397	4.49487e-154	1	4.49487e-154	1	8.62752e-71	1
BGIOSGA000791	2456	2819	1951	2475	1942	1.85106e-284	1	1.85106e-284	1	1.0684e-284	1
BGIOSGA000792	55	179	128	286	333	9.52429e-09	1	9.52429e-09	1	2.79424e-37	1
BGIOSGA000793	596	618	526	665	561	1.24049e-69	1	1.24049e-69	1	4.06638e-76	1
BGIOSGA000794	2	0	1	0	0	1.27917	0.150155	1.27917	0.025	1.8	0.025
BGIOSGA000795	14	29	4	30	6	0.474646	0.514569	0.474646	0.991497	0.211495	0.716018
BGIOSGA000796	289	317	226	298	302	1.96647e-30	1	1.96647e-30	1	2.68323e-36	1
BGIOSGA000797	394	144	253	164	162	2.47061e-37	1	2.47061e-37	1	4.00635e-19	1
BGIOSGA000798	1808	1947	2529	2219	1943	1.37153e-275	1	1.37153e-275	1	1.17562e-270	1
BGIOSGA000799	1807	1265	3488	1137	1243	0	1	0	1	1.85942e-152	1
BGIOSGA000800	14	20	15	10	11	0.0776676	0.861254	0.0776676	0.832126	0.190526	0.735853
BGIOSGA000801	3712	7950	4202	7673	10929	0	1	0	1	0	1
BGIOSGA000802	1139	654	1048	220	203	1.03148e-139	1	1.03148e-139	1	4.23034e-25	1
BGIOSGA000803	0	4	9	1	5	1.8	0.025	1.8	0.171677	1.19607	0.177046
BGIOSGA000804	71	38	258	221	160	7.81023e-13	1	7.81023e-13	0.999996	6.40065e-22	1
BGIOSGA000805	1328	1417	578	752	826	6.5273e-102	1	6.5273e-102	1	1.60222e-99	1
BGIOSGA000806	21	27	21	31	23	0.0170217	0.956166	0.0170217	0.990357	0.00463391	0.984342
BGIOSGA000807	96	137	70	126	114	3.21476e-09	1	3.21476e-09	1	7.70998e-14	1
BGIOSGA000808	5	0	0	0	0	1.8	0.025	1.8	0.025	1.8	0.025
BGIOSGA000809	3045	2625	2575	2887	1946	0	1	0	1	1.11491e-304	1
BGIOSGA000810	1361	1520	872	1827	1210	6.46195e-136	1	6.46195e-136	1	3.65074e-188	1
BGIOSGA000811	1261	1071	1026	1079	908	5.39801e-145	1	5.39801e-145	1	9.51238e-126	1
BGIOSGA000812	1355	1946	1559	1026	1132	2.28185e-187	1	2.28185e-187	1	1.07044e-137	1
BGIOSGA000813	1145	2001	1345	2161	1752	5.17453e-159	1	5.17453e-159	1	2.65559e-252	1
BGIOSGA000814	14	40	63	159	302	0.010793	0.969322	0.010793	0.999995	9.56472e-25	1
BGIOSGA000815	1892	1572	1825	2262	1848	6.04309e-242	1	6.04309e-242	1	1.35926e-265	1
BGIOSGA000816	4097	5798	4765	6187	6526	0	1	0	1	0	1
BGIOSGA000817	229	427	133	252	318	8.96023e-20	1	8.96023e-20	1	6.52311e-34	1
BGIOSGA000818	517	583	453	565	571	8.86982e-60	1	8.86982e-60	1	7.95374e-71	1
BGIOSGA000819	8617	12557	9091	12629	12689	0	1	0	1	0	1
BGIOSGA000820	1724	978	1147	926	581	1.00988e-177	1	1.00988e-177	1	6.63245e-90	1
BGIOSGA000821	1252	2502	1769	2333	2670	1.47837e-189	1	1.47837e-189	1	0	1
BGIOSGA000822	3360	2940	3681	3810	2849	0	1	0	1	0	1
BGIOSGA000823	564	793	470	1112	493	1.20555e-63	1	1.20555e-63	1	7.35186e-86	1
BGIOSGA000824	505	399	1160	935	339	1.50526e-88	1	1.50526e-88	1	1.10604e-61	1
BGIOSGA000825	99	91	87	56	34	1.35446e-10	1	1.35446e-10	0.999999	8.68513e-05	0.999415
BGIOSGA000826	2654	3539	3695	3717	3651	0	1	0	1	0	1
BGIOSGA000827	3390	2959	3829	6731	3060	0	1	0	1	0	1
BGIOSGA000828	1496	2228	1527	2548	2027	1.42024e-195	1	1.42024e-195	1	1.1746e-295	1
BGIOSGA000829	94	40	63	24	19	1.42631e-08	1	1.42631e-08	0.992322	0.0161959	0.957832
BGIOSGA000830	1212	694	2108	620	277	2.79223e-199	1	2.79223e-199	1	6.85727e-47	1
BGIOSGA000831	244	378	318	303	384	2.84417e-33	1	2.84417e-33	1	3.12153e-41	1
BGIOSGA000832	27	44	44	129	148	0.000812408	0.996209	0.000812408	0.999997	4.8344e-16	1
BGIOSGA000833	1622	1062	1394	1414	910	5.61147e-194	1	5.61147e-194	1	8.43463e-142	1
BGIOSGA000834	1300	811	1332	823	733	1.6776e-169	1	1.6776e-169	1	5.81435e-98	1
BGIOSGA000835	41	114	47	115	157	5.93962e-05	0.999576	5.93962e-05	1	2.01486e-15	1
BGIOSGA000836	656	599	705	701	348	2.12249e-85	1	2.12249e-85	1	1.77173e-57	1
BGIOSGA000837	3705	4313	3408	4554	3157	0	1	0	1	0	1
BGIOSGA000838	0	0	0	0	2	1.8	0.025	1.8	0.025	1.8	0.025
BGIOSGA000839	54	103	66	139	50	1.02348e-06	0.999987	1.02348e-06	1	2.37284e-08	1
BGIOSGA000840	933	2124	802	2830	3240	1.9708e-109	1	1.9708e-109	1	0	1
BGIOSGA000841	2	1	0	0	0	1.8	0.025	1.8	0.025	1.8	0.025
BGIOSGA000842	8	0	4	3	0	0.570822	0.455582	0.570822	0.025	1.8	0.025
BGIOSGA000843	2084	2363	1924	2943	2396	4.07194e-261	1	4.07194e-261	1	0	1
BGIOSGA000844	5568	5386	4997	6333	7122	0	1	0	1	0	1
BGIOSGA000845	1009	1061	591	666	782	5.06035e-94	1	5.06035e-94	1	1.32131e-90	1
BGIOSGA000846	680	830	341	640	710	4.51773e-56	1	4.51773e-56	1	1.47493e-84	1
BGIOSGA000847	686	416	869	368	121	7.99776e-97	1	7.99776e-97	1	1.73767e-21	1
BGIOSGA000848	109	181	141	130	141	3.11784e-14	1	3.11784e-14	1	9.9462e-16	1
BGIOSGA000849	4012	1999	1688	2486	904	0	1	0	1	7.67464e-171	1
BGIOSGA000850	1125	646	599	456	366	8.48472e-99	1	8.48472e-99	1	7.26912e-50	1
BGIOSGA000851	614	529	420	436	595	7.7072e-62	1	7.7072e-62	1	2.04903e-62	1
BGIOSGA000852	0	0	0	0	0	1.8	0.025	1.8	0.025	1.8	0.025
BGIOSGA000853	2166	2073	2736	2265	2614	0	1	0	1	0	1
BGIOSGA000854	1467	1904	1440	5815	5030	7.7498e-188	1	7.7498e-188	1	0	1
BGIOSGA000855	2690	4052	3599	3273	3978	0	1	0	1	0	1
BGIOSGA000856	3534	4788	6269	4951	5500	0	1	0	1	0	1
BGIOSGA000857	0	0	0	0	0	1.8	0.025	1.8	0.025	1.8	0.025
BGIOSGA000858	6939	7595	5944	9851	7598	0	1	0	1	0	1
BGIOSGA000859	4634	5540	7225	8183	4580	0	1	0	1	0	1
BGIOSGA000860	133	73	84	68	46	7.91269e-12	1	7.91269e-12	0.999999	3.35859e-06	0.999964
BGIOSGA000861	1729	2354	2027	2594	3492	4.68711e-243	1	4.68711e-243	1	0	1
BGIOSGA000862	62	98	36	52	50	3.78354e-05	0.999711	3.78354e-05	0.999998	9.285e-06	0.999913
BGIOSGA000863	558	240	364	205	170	2.59818e-54	1	2.59818e-54	1	5.95971e-22	1
BGIOSGA000864	280	1907	272	1011	998	3.00266e-33	1	3.00266e-33	1	3.59377e-128	1
BGIOSGA000865	306	238	150	176	31	7.15025e-24	1	7.15025e-24	1	5.90968e-06	0.999941
BGIOSGA000866	4	12	3	4	1	0.841121	0.316342	0.841121	0.50022	1.21218	0.171677
BGIOSGA000867	1065	1919	1117	2792	3808	1.49983e-139	1	1.49983e-139	1	0	1
BGIOSGA000868	707	346	615	307	180	1.51907e-82	1	1.51907e-82	1	4.48025e-27	1
BGIOSGA000869	5	3	3	3	0	0.788412	0.340888	0.788412	0.283096	1.8	0.025
BGIOSGA000870	83	26	12	53	5	0.0171498	0.955909	0.0171498	0.997175	0.255158	0.677062
BGIOSGA000871	1336	1287	1526	1206	978	5.18955e-184	1	5.18955e-184	1	3.45853e-138	1
BGIOSGA000872	1895	1858	1668	2075	1545	9.71681e-231	1	9.71681e-231	1	2.50238e-230	1
BGIOSGA000873	117	120	227	231	157	4.54799e-18	1	4.54799e-18	1	4.38159e-22	1
BGIOSGA000874	51	78	115	91	65	5.13685e-08	0.999999	5.13685e-08	1	1.28294e-08	1
BGIOSGA000875	40	172	22	75	73	0.00285603	0.9894	0.00285603	1	2.10762e-08	1
BGIOSGA000876	162	254	149	310	161	3.61157e-18	1	3.61157e-18	1	3.3863e-25	1
BGIOSGA000877	13	36	9	51	74	0.183929	0.742264	0.183929	0.999402	7.8947e-07	0.99999
BGIOSGA000878	426	3021	1241	2654	12762	1.80491e-79	1	1.80491e-79	1	0	1
BGIOSGA000879	357	365	445	424	519	1.36275e-48	1	1.36275e-48	1	1.09745e-57	1
BGIOSGA000880	280	293	182	245	265	2.78548e-26	1	2.78548e-26	1	1.48766e-30	1
BGIOSGA000881	16	89	16	49	127	0.0548632	0.892798	0.0548632	0.999995	5.06417e-08	0.999999
BGIOSGA000882	0	2	0	0	0	1.8	0.025	1.8	0.025	1.8	0.025
BGIOSGA000883	366	1122	396	904	552	1.44016e-46	1	1.44016e-46	1	3.6581e-86	1
BGIOSGA000884	1129	1680	1186	2272	1815	2.31683e-148	1	2.31683e-148	1	2.03401e-263	1
BGIOSGA000885	1641	305	466	225	191	1.84593e-91	1	1.84593e-91	1	1.56363e-24	1
BGIOSGA000886	585	49	141	37	20	4.1193e-27	1	4.1193e-27	0.999396	0.00516061	0.98293
BGIOSGA000887	75	54	75	38	58	1.60522e-08	1	1.60522e-08	0.999645	3.44361e-05	0.999733
BGIOSGA000888	442	436	962	723	1058	9.67324e-76	1	9.67324e-76	1	5.80579e-109	1
BGIOSGA000889	0	0	0	0	0	1.8	0.025	1.8	0.025	1.8	0.025
BGIOSGA000890	7	8	10	0	1	0.309959	0.631902	0.309959	0.025	1.8	0.025
BGIOSGA000891	0	0	0	0	0	1.8	0.025	1.8	0.025	1.8	0.025
BGIOSGA000892	57	25	186	103	118	5.82898e-10	1	5.82898e-10	0.999086	1.13933e-12	1
BGIOSGA000893	129	63	81	50	16	2.04517e-11	1	2.04517e-11	0.99997	0.00783184	0.976194
BGIOSGA000894	14	14	5	10	7	0.372897	0.584199	0.372897	0.780489	0.309959	0.631902
BGIOSGA000895	39	11	45	31	20	9.93238e-05	0.999345	9.93238e-05	0.897114	0.00769825	0.976517
BGIOSGA000896	1671	238	563	510	582	9.37642e-107	1	9.37642e-107	1	1.17187e-67	1
BGIOSGA000897	3212	4908	4815	5907	5681	0	1	0	1	0	1
BGIOSGA000898	8	3	13	24	5	0.215945	0.711909	0.215945	0.455582	0.307274	0.63403
BGIOSGA000899	2264	7555	4425	8505	6734	0	1	0	1	0	1
BGIOSGA000900	614	625	642	612	508	1.30741e-78	1	1.30741e-78	1	3.69609e-69	1
BGIOSGA000901	3532	6977	1455	2654	3513	3.38639e-269	1	3.38639e-269	1	0	1
BGIOSGA000902	7010	2794	5308	3304	1996	0	1	0	1	0	1
BGIOSGA000903	0	1	0	0	0	1.8	0.025	1.8	0.025	1.8	0.025
BGIOSGA000904	2	0	0	0	0	1.8	0.025	1.8	0.025	1.8	0.025
BGIOSGA000905	7696	10490	10154	16617	16014	0	1	0	1	0	1
BGIOSGA000906	244	306	524	402	442	1.70013e-40	1	1.70013e-40	1	8.57838e-52	1
BGIOSGA000907	7653	8704	10604	11899	14398	0	1	0	1	0	1
BGIOSGA000908	68	23	37	32	14	2.05139e-05	0.999829	2.05139e-05	0.985396	0.0243951	0.942075
BGIOSGA000909	0	9	0	0	0	1.8	0.025	1.8	0.025	1.8	0.025
BGIOSGA000910	12	0	28	2	0	0.0456062	0.906684	0.0456062	0.025	1.8	0.025
BGIOSGA000911	2059	1696	884	2075	2052	5.22018e-159	1	5.22018e-159	1	1.58572e-269	1
BGIOSGA000912	144	205	148	247	343	4.92224e-17	1	4.92224e-17	1	1.12907e-34	1
BGIOSGA000913	4623	1445	3215	1558	1024	0	1	0	1	7.44392e-159	1
BGIOSGA000914	66	73	56	66	70	7.47642e-07	0.99999	7.47642e-07	0.999999	1.06263e-07	0.999998
BGIOSGA000915	1076	1275	668	1047	938	2.1691e-104	1	2.1691e-104	1	3.41365e-126	1
BGIOSGA000916	63	13	77	37	9	7.39416e-08	0.999999	7.39416e-08	0.939521	0.0777472	0.861149
BGIOSGA000917	363	624	164	269	185	6.00117e-27	1	6.00117e-27	1	4.14251e-26	1
BGIOSGA000918	0	0	0	0	0	1.8	0.025	1.8	0.025	1.8	0.025
BGIOSGA000919	246	270	154	252	329	2.1585e-22	1	2.1585e-22	1	1.90511e-34	1
BGIOSGA000920	2087	2302	2270	2404	3215	1.79967e-284	1	1.79967e-284	1	0	1
BGIOSGA000921	3	4	5	13	1	0.788412	0.340888	0.788412	0.507851	1.15133	0.19236
BGIOSGA000922	1478	1162	1335	1487	1345	4.22383e-181	1	4.22383e-181	1	2.23416e-182	1
BGIOSGA000923	4017	3781	2909	4775	4307	0	1	0	1	0	1
BGIOSGA000924	0	0	0	0	0	1.8	0.025	1.8	0.025	1.8	0.025
BGIOSGA000925	2286	536	2779	360	123	0	1	0	1	1.22134e-21	1
BGIOSGA000926	315	207	151	390	313	3.17753e-24	1	3.17753e-24	1	2.51731e-42	1
BGIOSGA000927	14	30	13	11	15	0.097478	0.836159	0.097478	0.894586	0.11644	0.813665
BGIOSGA000928	0	2	4	4	6	1.8	0.025	1.8	0.256893	0.636936	0.41823
BGIOSGA000929	127	508	519	634	632	3.2482e-24	1	3.2482e-24	1	2.64763e-79	1
BGIOSGA000930	3	13	15	18	16	0.61135	0.432401	0.61135	0.874901	0.0441383	0.908957
BGIOSGA000931	18	26	8	2	1	0.16689	0.759238	0.16689	0.338179	1.27917	0.150155
BGIOSGA000932	6920	3349	928	576	482	2.6446e-212	1	2.6446e-212	1	3.24583e-65	1
BGIOSGA000933	24	48	16	55	23	0.0260459	0.939082	0.0260459	0.999919	0.00104991	0.995317
BGIOSGA000934	156	102	112	68	65	3.91047e-15	1	3.91047e-15	1	1.57415e-07	0.999998
BGIOSGA000935	7629	14730	5079	20338	10607	0	1	0	1	0	1
BGIOSGA000936	0	0	3	0	0	1.8	0.025	1.8	0.025	1.8	0.025
BGIOSGA000937	363	462	340	367	272	8.12587e-43	1	8.12587e-43	1	7.00609e-38	1
BGIOSGA000938	1192	1607	919	1972	1487	1.36828e-132	1	1.36828e-132	1	3.41934e-220	1
BGIOSGA000939	978	2320	867	2060	1146	6.73471e-117	1	6.73471e-117	1	2.03587e-190	1
BGIOSGA000940	123	147	104	113	68	5.37526e-13	1	5.37526e-13	1	1.10478e-09	1
BGIOSGA000941	24	10	9	37	15	0.106457	0.82534	0.106457	0.887988	0.0156772	0.958889
BGIOSGA000942	648	982	788	787	649	1.56006e-89	1	1.56006e-89	1	1.47152e-89	1
BGIOSGA000943	526	801	808	882	1099	7.49662e-80	1	7.49662e-80	1	9.41031e-125	1
BGIOSGA000944	347	229	194	282	347	7.87343e-30	1	7.87343e-30	1	1.02442e-37	1
BGIOSGA000945	271	862	637	2844	6924	1.51602e-46	1	1.51602e-46	1	0	1
BGIOSGA000946	16	13	47	43	15	0.00856127	0.974453	0.00856127	0.946978	0.0126637	0.965213
BGIOSGA000947	721	426	445	335	470	1.57322e-68	1	1.57322e-68	1	5.96694e-48	1
BGIOSGA000948	1754	469	1368	579	717	5.09627e-199	1	5.09627e-199	1	2.64779e-80	1
BGIOSGA000949	0	2	0	0	1	1.8	0.025	1.8	0.025	1.8	0.025
BGIOSGA000950	0	0	4	0	6	1.8	0.025	1.8	0.025	1.8	0.025
BGIOSGA000951	0	0	0	0	0	1.8	0.025	1.8	0.025	1.8	0.025
BGIOSGA000952	285	39	163	49	2	1.25048e-24	1	1.25048e-24	0.999541	0.773728	0.347932
BGIOSGA000953	303	328	146	246	253	2.42877e-23	1	2.42877e-23	1	6.6432e-30	1
BGIOSGA000954	329	189	161	367	362	9.91355e-26	1	9.91355e-26	1	1.58522e-44	1
BGIOSGA000955	150	149	99	123	335	8.67229e-14	1	8.67229e-14	1	3.23998e-21	1
BGIOSGA000956	3	4	0	1	2	1.8	0.025	1.8	0.171677	1.27917	0.150155
BGIOSGA000957	692	509	1930	713	189	4.63939e-130	1	4.63939e-130	1	3.80099e-36	1
BGIOSGA000958	1050	1033	2362	1310	464	6.90258e-188	1	6.90258e-188	1	3.85551e-86	1
BGIOSGA000959	0	1	1	6	0	1.8	0.025	1.8	0.180878	1.8	0.025
BGIOSGA000960	0	0	0	0	6	1.8	0.025	1.8	0.025	1.8	0.025
BGIOSGA000961	1184	2081	1451	1796	1497	6.30843e-168	1	6.30843e-168	1	8.0343e-212	1
BGIOSGA000962	2	2	0	0	2	1.8	0.025	1.8	0.025	1.8	0.025
BGIOSGA000963	1	3	0	0	2	1.8	0.025	1.8	0.025	1.8	0.025
BGIOSGA000964	0	0	0	0	0	1.8	0.025	1.8	0.025	1.8	0.025
BGIOSGA000965	16	4	11	4	0	0.107757	0.8238	0.107757	0.359719	1.8	0.025
BGIOSGA000966	0	0	1	0	0	1.8	0.025	1.8	0.025	1.8	0.025
BGIOSGA000967	0	0	0	0	0	1.8	0.025	1.8	0.025	1.8	0.025
BGIOSGA000968	875	981	1292	949	400	2.53414e-133	1	2.53414e-133	1	3.77515e-70	1
BGIOSGA000969	94	29	266	142	107	3.58721e-16	1	3.58721e-16	0.999838	4.01952e-14	1
BGIOSGA000970	105	91	57	81	78	2.16359e-08	1	2.16359e-08	1	4.81146e-09	1
BGIOSGA000971	480	343	302	275	251	2.50131e-45	1	2.50131e-45	1	1.52311e-31	1
BGIOSGA000972	0	0	1	0	0	1.8	0.025	1.8	0.025	1.8	0.025
BGIOSGA000973	611	420	392	315	350	4.3007e-59	1	4.3007e-59	1	2.54967e-40	1
BGIOSGA000974	229	534	244	334	316	3.02991e-28	1	3.02991e-28	1	1.8935e-39	1
BGIOSGA000975	0	2	0	4	3	1.8	0.025	1.8	0.256893	0.841121	0.316342
BGIOSGA000976	9	33	2	0	2	0.867853	0.304316	0.867853	0.025	1.8	0.025
BGIOSGA000977	4208	4802	2679	5519	4197	0	1	0	1	0	1
BGIOSGA000978	405	506	323	594	758	7.13266e-44	1	7.13266e-44	1	1.26452e-83	1
BGIOSGA000979	375	678	245	451	563	7.72412e-36	1	7.72412e-36	1	4.22562e-62	1
BGIOSGA000980	1994	3229	1624	3072	3091	7.40352e-233	1	7.40352e-233	1	0	1
BGIOSGA000981	0	0	0	0	0	1.8	0.025	1.8	0.025	1.8	0.025
BGIOSGA000982	2856	5036	6616	6192	5827	0	1	0	1	0	1
BGIOSGA000983	0	0	0	0	0	1.8	0.025	1.8	0.025	1.8	0.025
BGIOSGA000984	0	0	0	0	0	1.8	0.025	1.8	0.025	1.8	0.025
BGIOSGA000985	1984	1563	2541	1906	1620	1.1306e-291	1	1.1306e-291	1	1.12247e-227	1
BGIOSGA000986	0	0	0	0	0	1.8	0.025	1.8	0.025	1.8	0.025
BGIOSGA000987	65	93	246	79	76	8.21943e-12	1	8.21943e-12	1	8.25447e-09	1
BGIOSGA000988	210	335	322	162	48	1.66954e-30	1	1.66954e-30	1	2.06801e-08	1
BGIOSGA000989	1621	1220	1318	1948	1687	6.63347e-188	1	6.63347e-188	1	2.82634e-235	1
BGIOSGA000990	34	14	67	36	63	4.23927e-05	0.999682	4.23927e-05	0.948841	3.53207e-05	0.999728
BGIOSGA000991	0	0	0	0	0	1.8	0.025	1.8	0.025	1.8	0.025
BGIOSGA000992	146	120	105	369	271	3.8969e-14	1	3.8969e-14	1	6.88663e-38	1
BGIOSGA000993	696	717	77	204	173	3.84955e-16	1	3.84955e-16	1	4.04215e-22	1
BGIOSGA000994	63	56	27	98	130	0.000273375	0.998466	0.000273375	0.999999	6.99392e-13	1
BGIOSGA000995	3991	2455	2762	3730	2673	0	1	0	1	0	1
BGIOSGA000996	156	270	154	202	245	3.85941e-18	1	3.85941e-18	1	2.19542e-26	1
BGIOSGA000997	319	37	399	141	126	2.96811e-43	1	2.96811e-43	0.999985	1.84148e-15	1
BGIOSGA000998	2610	2640	2125	2816	3032	4.52604e-307	1	4.52604e-307	1	0	1
BGIOSGA000999	20	5	23	16	2	0.0154948	0.959262	0.0154948	0.598431	0.819915	0.326082
BGIOSGA001000	415	471	505	392	306	2.99995e-56	1	2.99995e-56	1	7.22116e-42	1
BGIOSGA001001	1046	1951	1425	2346	2387	5.91979e-155	1	5.91979e-155	1	0	1
BGIOSGA001002	0	0	0	0	0	1.8	0.025	1.8	0.025	1.8	0.025
BGIOSGA001003	371	529	957	713	910	1.68882e-66	1	1.68882e-66	1	3.89201e-101	1
BGIOSGA001004	2275	1714	1931	1769	2022	5.962e-273	1	5.962e-273	1	7.43566e-246	1
BGIOSGA001005	354	725	294	329	396	5.33273e-39	1	5.33273e-39	1	7.08599e-44	1
BGIOSGA001006	324	525	45	64	50	5.42907e-09	1	5.42907e-09	1	2.41206e-06	0.999973
BGIOSGA001007	43	12	48	44	36	3.97146e-05	0.999699	3.97146e-05	0.935197	0.000173268	0.998953
BGIOSGA001008	1225	1441	844	1189	1867	1.66744e-127	1	1.66744e-127	1	9.27468e-188	1
BGIOSGA001009	120	231	64	127	172	1.62735e-09	1	1.62735e-09	1	4.73041e-17	1
BGIOSGA001010	121	337	41	273	467	6.28541e-07	0.999992	6.28541e-07	1	5.59318e-42	1
BGIOSGA001011	692	355	320	205	234	6.26227e-54	1	6.26227e-54	1	5.04927e-26	1
BGIOSGA001012	2581	2879	3030	3615	4455	0	1	0	1	0	1
BGIOSGA001013	8090	12000	5562	10733	6907	0	1	0	1	0	1
BGIOSGA001014	0	3	0	0	0	1.8	0.025	1.8	0.025	1.8	0.025
BGIOSGA001015	76	12	36	8	27	1.61114e-05	0.999861	1.61114e-05	0.698439	0.125926	0.80288
BGIOSGA001016	243	205	133	124	160	3.18496e-20	1	3.18496e-20	1	2.85949e-16	1
BGIOSGA001017	0	0	1	4	0	1.8	0.025	1.8	0.025	1.8	0.025
BGIOSGA001018	2146	3872	1509	4129	3316	1.96153e-230	1	1.96153e-230	1	0	1
BGIOSGA001019	45	63	28	82	75	0.000623911	0.996952	0.000623911	0.999999	6.52327e-09	1
BGIOSGA001020	2790	2512	2420	2350	1025	0	1	0	1	2.25502e-184	1
BGIOSGA001021	604	616	735	665	467	3.08541e-83	1	3.08541e-83	1	2.57886e-68	1
BGIOSGA001022	14520	15433	23205	18741	16985	0	1	0	1	0	1
BGIOSGA001023	197	366	324	423	275	2.39939e-29	1	2.39939e-29	1	1.53347e-40	1
BGIOSGA001024	289	253	360	286	488	6.37006e-39	1	6.37006e-39	1	4.92132e-44	1
BGIOSGA001025	3254	2695	2385	2556	3884	0	1	0	1	0	1
BGIOSGA001026	0	0	33	80	56	1.8	0.025	1.8	0.025	1.83869e-07	0.999997
BGIOSGA001027	0	0	0	0	0	1.8	0.025	1.8	0.025	1.8	0.025
BGIOSGA001028	21	21	27	18	5	0.00908796	0.973216	0.00908796	0.941084	0.338307	0.609917
BGIOSGA001029	374	761	507	718	944	5.26028e-53	1	5.26028e-53	1	2.97507e-103	1
BGIOSGA001030	2689	1877	2726	2998	2102	0	1	0	1	0	1
BGIOSGA001031	1	5	2	4	6	1.27917	0.150155	1.27917	0.392573	0.636936	0.41823
BGIOSGA001032	13759	1756	10610	2538	1133	0	1	0	1	5.84575e-203	1
BGIOSGA001033	2407	2408	2808	3086	2566	0	1	0	1	0	1
BGIOSGA001034	2578	2505	2207	2750	2291	0	1	0	1	0	1
BGIOSGA001035	1185	1587	1601	1998	2222	1.20203e-175	1	1.20203e-175	1	5.5426e-275	1
BGIOSGA001036	516	338	583	344	333	3.72247e-68	1	3.72247e-68	1	3.42371e-41	1
BGIOSGA001037	9674	10156	8902	10657	10918	0	1	0	1	0	1
BGIOSGA001038	1787	2262	1826	2078	2357	4.9867e-235	1	4.9867e-235	1	4.72969e-289	1
BGIOSGA001039	0	1	0	0	2	1.8	0.025	1.8	0.025	1.8	0.025
BGIOSGA001040	1	8	4	1	0	1.21218	0.171677	1.21218	0.185984	1.8	0.025
BGIOSGA001041	2215	4534	2117	3607	3900	3.69764e-283	1	3.69764e-283	1	0	1
BGIOSGA001042	4313	6093	2985	8378	5909	0	1	0	1	0	1
BGIOSGA001043	39	66	11	38	38	0.0419534	0.912382	0.0419534	0.99984	0.000259896	0.99853
BGIOSGA001044	581	53	535	55	35	2.1044e-69	1	2.1044e-69	0.999956	7.70824e-05	0.999471
BGIOSGA001045	1771	1683	0	9	0	1.8	0.025	1.8	0.923168	1.8	0.025
BGIOSGA001046	1642	2968	1606	2791	2692	1.33413e-210	1	1.33413e-210	1	0	1
BGIOSGA001047	111	220	108	436	321	1.31243e-12	1	1.31243e-12	1	3.33703e-45	1
BGIOSGA001048	174	125	219	149	200	5.94936e-23	1	5.94936e-23	1	4.39941e-20	1
BGIOSGA001049	598	977	1124	1492	1857	1.18118e-98	1	1.18118e-98	1	1.01092e-214	1
BGIOSGA001050	86	25	136	92	54	4.08268e-12	1	4.08268e-12	0.998888	1.03092e-07	0.999998
BGIOSGA001051	142	152	103	96	131	8.39043e-14	1	8.39043e-14	1	9.10405e-13	1
BGIOSGA001052	168	54	163	83	80	1.98904e-19	1	1.98904e-19	0.999997	2.8016e-09	1
BGIOSGA001053	26	77	36	20	28	0.00183065	0.992616	0.00183065	0.994616	0.00974811	0.97169
BGIOSGA001054	17693	5853	21893	8395	5267	0	1	0	1	0	1
BGIOSGA001055	1209	1800	1766	1795	1947	1.96256e-185	1	1.96256e-185	1	2.74384e-243	1
BGIOSGA001056	40	64	64	59	55	1.46246e-05	0.999872	1.46246e-05	0.999992	1.96059e-06	0.999977
BGIOSGA001057	5670	12093	7792	9452	8644	0	1	0	1	0	1
BGIOSGA001058	0	2	0	0	0	1.8	0.025	1.8	0.025	1.8	0.025
BGIOSGA001059	21	139	33	348	569	0.00554836	0.981911	0.00554836	1	3.46299e-53	1
BGIOSGA001060	6503	4153	17646	7402	8127	0	1	0	1	0	1
BGIOSGA001061	445	401	418	284	315	4.3802e-53	1	4.3802e-53	1	3.91171e-36	1
BGIOSGA001062	6816	8961	7770	8697	8472	0	1	0	1	0	1
BGIOSGA001063	312	207	236	166	105	2.45294e-32	1	2.45294e-32	1	6.38459e-15	1
BGIOSGA001064	567	623	753	818	899	4.04631e-81	1	4.04631e-81	1	1.20416e-108	1
BGIOSGA001065	190	38	57	41	14	5.18118e-10	1	5.18118e-10	0.998918	0.0175439	0.955123
BGIOSGA001066	5	14	5	4	2	0.61135	0.432401	0.61135	0.514569	0.979689	0.256893
BGIOSGA001067	11	3	19	3	2	0.0879992	0.847939	0.0879992	0.283096	1.03319	0.235755
BGIOSGA001068	0	0	0	0	0	1.8	0.025	1.8	0.025	1.8	0.025
BGIOSGA001069	206	381	235	524	282	3.78039e-26	1	3.78039e-26	1	8.31618e-45	1
BGIOSGA001070	3797	5996	3822	6180	7031	0	1	0	1	0	1
BGIOSGA001071	14	0	0	0	0	1.8	0.025	1.8	0.025	1.8	0.025
BGIOSGA001072	775	748	922	1246	1230	9.6613e-107	1	9.6613e-107	1	3.83279e-159	1
BGIOSGA001073	5943	6514	3705	7421	6243	0	1	0	1	0	1
BGIOSGA001074	2036	2792	917	1081	1078	1.13348e-162	1	1.13348e-162	1	4.15476e-138	1
BGIOSGA001075	1	0	0	0	3	1.8	0.025	1.8	0.025	1.8	0.025
BGIOSGA001076	102	143	112	83	176	2.77697e-12	1	2.77697e-12	1	5.23093e-13	1
BGIOSGA001077	30	28	3	3	4	0.556715	0.463871	0.556715	0.461472	0.841121	0.316342
BGIOSGA001078	1053	369	986	659	446	5.13738e-130	1	5.13738e-130	1	3.83067e-66	1
BGIOSGA001079	2632	2476	2698	2726	2663	0	1	0	1	0	1
BGIOSGA001080	26	68	63	34	39	0.000351071	0.99811	0.000351071	0.999697	0.000396216	0.99791
BGIOSGA001081	576	224	541	518	479	1.60728e-69	1	1.60728e-69	1	1.05859e-61	1
BGIOSGA001082	7	3	1	0	0	1.17627	0.183751	1.17627	0.025	1.8	0.025
BGIOSGA001083	129	894	76	606	482	5.90372e-11	1	5.90372e-11	1	8.68136e-67	1
BGIOSGA001084	33	28	9	24	33	0.0839117	0.853144	0.0839117	0.982531	0.00330661	0.988067
BGIOSGA001085	815	527	1129	889	2559	1.58263e-120	1	1.58263e-120	1	5.27866e-170	1
BGIOSGA001086	1210	1881	1286	1896	3447	2.51654e-160	1	2.51654e-160	1	0	1
BGIOSGA001087	2047	1939	1725	2288	2200	7.17863e-244	1	7.17863e-244	1	1.11375e-293	1
BGIOSGA001088	16671	14002	18819	17263	13187	0	1	0	1	0	1
BGIOSGA001089	8	0	0	0	0	1.8	0.025	1.8	0.025	1.8	0.025
BGIOSGA001090	288	550	336	570	928	1.36815e-37	1	1.36815e-37	1	6.95679e-89	1
BGIOSGA001091	0	0	0	8	0	1.8	0.025	1.8	0.025	1.8	0.025
BGIOSGA001092	2556	5431	3374	6670	4522	0	1	0	1	0	1
BGIOSGA001093	18	12	33	12	10	0.00984038	0.971478	0.00984038	0.791783	0.173195	0.752885
BGIOSGA001094	9	0	2	0	0	0.867853	0.304316	0.867853	0.025	1.8	0.025
BGIOSGA001095	4979	5465	4263	6342	6558	0	1	0	1	0	1
BGIOSGA001096	0	0	0	2	5	1.8	0.025	1.8	0.025	0.943133	0.271899
BGIOSGA001097	6	8	10	4	6	0.362626	0.591715	0.362626	0.455582	0.636936	0.41823
BGIOSGA001098	0	2	0	2	0	1.8	0.025	1.8	0.203818	1.8	0.025
BGIOSGA001099	39953	59605	39944	53807	40298	0	1	0	1	0	1
BGIOSGA001100	78	206	58	91	143	1.54787e-07	0.999998	1.54787e-07	1	8.10401e-13	1
BGIOSGA001101	1836	2243	1569	1965	3084	9.95037e-220	1	9.95037e-220	1	0	1
BGIOSGA001102	9304	11053	8297	12521	9877	0	1	0	1	0	1
BGIOSGA001103	0	6	7	0	1	1.8	0.025	1.8	0.025	1.8	0.025
BGIOSGA001104	0	0	0	1	0	1.8	0.025	1.8	0.025	1.8	0.025
BGIOSGA001105	63	17	82	109	135	4.38361e-08	0.999999	4.38361e-08	0.991362	5.97752e-14	1
BGIOSGA001106	0	0	0	2	1	1.8	0.025	1.8	0.025	1.27917	0.150155
BGIOSGA001107	23	137	2	50	83	0.79962	0.335574	0.79962	0.999999	4.62553e-07	0.999994
BGIOSGA001108	8018	7768	11435	8334	6900	0	1	0	1	0	1
BGIOSGA001109	171	77	134	257	108	1.47131e-17	1	1.47131e-17	1	8.77224e-18	1
BGIOSGA001110	4060	2187	4579	2596	2644	0	1	0	1	0	1
BGIOSGA001111	0	1	12	3	3	1.8	0.025	1.8	0.163616	0.91658	0.283096
BGIOSGA001112	0	0	0	0	0	1.8	0.025	1.8	0.025	1.8	0.025
BGIOSGA001113	595	757	2	4	11	0.751608	0.358716	0.751608	0.617106	0.511143	0.491482
BGIOSGA001114	933	1076	4	2	3	0.328361	0.617533	0.328361	0.359164	1.03319	0.235755
BGIOSGA001115	0	0	0	0	0	1.8	0.025	1.8	0.025	1.8	0.025
BGIOSGA001116	106	261	723	798	993	7.87136e-22	1	7.87136e-22	1	2.24309e-112	1
BGIOSGA001117	1548	1398	1248	1277	1142	2.6279e-178	1	2.6279e-178	1	7.33749e-155	1
BGIOSGA001118	74	121	38	48	81	1.13306e-05	0.999897	1.13306e-05	0.999999	8.11645e-07	0.99999
BGIOSGA001119	5996	9421	6325	9970	10248	0	1	0	1	0	1
BGIOSGA001120	309	618	86	615	520	1.21872e-15	1	1.21872e-15	1	3.02713e-70	1
BGIOSGA001121	2101	1440	1555	1362	2479	1.78418e-232	1	1.78418e-232	1	1.43013e-228	1
BGIOSGA001122	531	456	434	534	332	4.2578e-59	1	4.2578e-59	1	2.68027e-50	1
BGIOSGA001123	0	0	17	41	1	1.8	0.025	1.8	0.025	1.12964	0.200002
BGIOSGA001124	0	0	93	93	18	1.8	0.025	1.8	0.025	0.00184489	0.992569
BGIOSGA001125	64	61	72	7	0	1.11382e-07	0.999998	1.11382e-07	0.809607	1.8	0.025
BGIOSGA001126	0	0	0	0	0	1.8	0.025	1.8	0.025	1.8	0.025
BGIOSGA001127	685	79	449	73	12	1.67005e-67	1	1.67005e-67	1	0.0186639	0.952912
BGIOSGA001128	108	16	88	76	169	4.09987e-11	1	4.09987e-11	0.984425	4.71254e-12	1
BGIOSGA001129	0	0	0	1	0	1.8	0.025	1.8	0.025	1.8	0.025
BGIOSGA001130	232	456	154	362	583	7.37824e-22	1	7.37824e-22	1	4.28089e-55	1
BGIOSGA001131	67	68	99	77	65	4.26773e-09	1	4.26773e-09	0.999999	5.37539e-08	0.999999
BGIOSGA001132	557	890	386	834	875	2.66507e-56	1	2.66507e-56	1	2.63498e-108	1
BGIOSGA001133	42	57	46	81	72	5.76903e-05	0.999587	5.76903e-05	0.999998	1.1514e-08	1
BGIOSGA001134	256	70	302	130	119	2.14015e-33	1	2.14015e-33	1	2.16705e-14	1
BGIOSGA001135	2	2	22	1	2	0.801772	0.334559	0.801772	0.150155	1.27917	0.150155
BGIOSGA001136	0	0	1	3	7	1.8	0.025	1.8	0.025	0.719794	0.374606
BGIOSGA001137	19050	1560	7754	2031	1619	0	1	0	1	2.02485e-234	1
BGIOSGA001138	0	0	0	0	0	1.8	0.025	1.8	0.025	1.8	0.025
BGIOSGA001139	880	554	778	712	689	1.34076e-104	1	1.34076e-104	1	4.13877e-88	1
BGIOSGA001140	379	509	280	389	582	4.16605e-39	1	4.16605e-39	1	1.23458e-57	1
BGIOSGA001141	719	720	663	569	749	9.66375e-87	1	9.66375e-87	1	4.28031e-81	1
BGIOSGA001142	0	0	0	0	0	1.8	0.025	1.8	0.025	1.8	0.025
BGIOSGA001143	0	0	0	0	0	1.8	0.025	1.8	0.025	1.8	0.025
BGIOSGA001144	187	27	257	66	35	9.14034e-26	1	9.14034e-26	0.998627	3.6015e-05	0.999723
BGIOSGA001145	0	0	9	3	4	1.8	0.025	1.8	0.025	0.841121	0.316342
BGIOSGA001146	0	0	0	0	0	1.8	0.025	1.8	0.025	1.8	0.025
BGIOSGA001147	393	473	190	388	446	9.48539e-31	1	9.48539e-31	1	5.18681e-51	1
BGIOSGA001148	275	395	173	305	341	2.96968e-25	1	2.96968e-25	1	4.24855e-39	1
BGIOSGA001149	1273	991	574	628	436	4.82261e-100	1	4.82261e-100	1	6.7342e-64	1
BGIOSGA001150	1026	1169	615	1010	1235	3.98956e-97	1	3.98956e-97	1	2.58273e-142	1
BGIOSGA001151	631	91	347	42	21	3.08088e-55	1	3.08088e-55	0.99998	0.00314042	0.988554
BGIOSGA001152	11	19	4	0	2	0.511143	0.491482	0.511143	0.025	1.8	0.025
BGIOSGA001153	0	0	0	0	0	1.8	0.025	1.8	0.025	1.8	0.025
BGIOSGA001154	0	0	0	0	0	1.8	0.025	1.8	0.025	1.8	0.025
BGIOSGA001155	0	3	6	4	0	1.8	0.025	1.8	0.316342	1.8	0.025
BGIOSGA001156	3	2	2	0	0	1.03319	0.235755	1.03319	0.025	1.8	0.025
BGIOSGA001157	0	3	0	0	0	1.8	0.025	1.8	0.025	1.8	0.025
BGIOSGA001158	53	181	53	45	102	5.48612e-06	0.999945	5.48612e-06	0.999999	4.57321e-07	0.999994
BGIOSGA001159	33	106	68	77	13	5.03989e-05	0.999631	5.03989e-05	1	0.0126544	0.965233
BGIOSGA001160	1352	2511	545	2339	1910	3.74886e-98	1	3.74886e-98	1	8.06393e-275	1
BGIOSGA001161	1405	2198	1728	2155	2336	1.02122e-200	1	1.02122e-200	1	1.65798e-293	1
BGIOSGA001162	2072	477	872	989	766	9.57725e-158	1	9.57725e-158	1	1.55649e-109	1
BGIOSGA001163	9	29	4	15	34	0.54714	0.469566	0.54714	0.945094	0.0177802	0.954653
BGIOSGA001164	0	0	0	0	0	1.8	0.025	1.8	0.025	1.8	0.025
BGIOSGA001165	15	11	38	9	15	0.0150797	0.960117	0.0150797	0.711702	0.160618	0.765646
BGIOSGA001166	0	0	0	0	0	1.8	0.025	1.8	0.025	1.8	0.025
BGIOSGA001167	1	0	3	0	1	1.23681	0.163616	1.23681	0.025	1.8	0.025
BGIOSGA001168	74	78	142	64	36	3.75891e-11	1	3.75891e-11	0.999999	3.30173e-05	0.999743
BGIOSGA001169	6398	8004	6881	6717	7160	0	1	0	1	0	1
BGIOSGA001170	205	120	178	23	21	1.56316e-22	1	1.56316e-22	0.998706	0.0135616	0.963294
BGIOSGA001171	0	0	0	0	0	1.8	0.025	1.8	0.025	1.8	0.025
BGIOSGA001172	1150	2303	1107	2168	1349	1.4957e-144	1	1.4957e-144	1	7.30429e-216	1
BGIOSGA001173	1239	1523	974	1211	1012	1.3883e-139	1	1.3883e-139	1	3.60437e-141	1
BGIOSGA001174	1719	2520	1408	2024	2082	1.78504e-200	1	1.78504e-200	1	4.53772e-268	1
BGIOSGA001175	1100	940	1146	719	626	8.17843e-144	1	8.17843e-144	1	4.77693e-84	1
BGIOSGA001176	1	0	0	0	0	1.8	0.025	1.8	0.025	1.8	0.025
BGIOSGA001177	0	1	0	0	0	1.8	0.025	1.8	0.025	1.8	0.025
BGIOSGA001178	9	38	9	27	22	0.262892	0.670454	0.262892	0.994411	0.00782717	0.976206
BGIOSGA001179	5502	5754	5563	6800	4425	0	1	0	1	0	1
BGIOSGA001180	106	1150	86	501	414	7.13215e-11	1	7.13215e-11	1	5.82997e-56	1
BGIOSGA001181	320	90	335	141	115	8.88498e-40	1	8.88498e-40	1	1.1023e-14	1
BGIOSGA001182	284	98	242	81	33	2.11496e-31	1	2.11496e-31	1	2.6761e-05	0.999785
BGIOSGA001183	4676	5093	3984	5624	4425	0	1	0	1	0	1
BGIOSGA001184	1422	875	853	947	757	2.29988e-136	1	2.29988e-136	1	1.20403e-106	1
BGIOSGA001185	2168	1407	1485	1848	1695	3.49727e-229	1	3.49727e-229	1	6.32218e-230	1
BGIOSGA001186	301	31	62	118	13	8.23902e-12	1	8.23902e-12	0.999868	0.00954754	0.972151
BGIOSGA001187	4085	4219	4401	6071	3772	0	1	0	1	0	1
BGIOSGA001188	383	98	234	158	81	4.28347e-35	1	4.28347e-35	1	2.53527e-12	1
BGIOSGA001189	0	0	0	0	0	1.8	0.025	1.8	0.025	1.8	0.025
BGIOSGA001190	128	25	13	54	11	0.00913655	0.973103	0.00913655	0.996727	0.0323399	0.928098
BGIOSGA001191	3752	4010	3891	3602	5371	0	1	0	1	0	1
BGIOSGA001192	231	3	61	13	3	4.65828e-11	1	4.65828e-11	0.423566	0.627227	0.423566
BGIOSGA001193	0	0	0	0	0	1.8	0.025	1.8	0.025	1.8	0.025
BGIOSGA001194	1847	2150	1443	1844	2084	4.0484e-210	1	4.0484e-210	1	3.41736e-255	1
BGIOSGA001195	2228	2376	1954	2718	3084	5.05195e-272	1	5.05195e-272	1	0	1
BGIOSGA001196	117	76	97	64	40	3.36954e-12	1	3.36954e-12	0.999999	1.46246e-05	0.999872
BGIOSGA001197	6	18	3	0	0	0.749572	0.359719	0.749572	0.025	1.8	0.025
BGIOSGA001198	657	94	355	80	50	6.12381e-57	1	6.12381e-57	1	5.81912e-07	0.999992
BGIOSGA001199	104	34	60	78	114	1.19489e-08	1	1.19489e-08	0.999806	1.34999e-10	1
BGIOSGA001200	207	999	198	889	890	5.23852e-24	1	5.23852e-24	1	5.52276e-113	1
BGIOSGA001201	174	295	202	313	494	4.36391e-22	1	4.36391e-22	1	6.31061e-47	1
BGIOSGA001202	5148	9704	3076	10001	8773	0	1	0	1	0	1
BGIOSGA001203	4877	10418	6114	10003	12490	0	1	0	1	0	1
BGIOSGA001204	2383	2264	2931	3020	3586	0	1	0	1	0	1
BGIOSGA001205	0	0	0	0	0	1.8	0.025	1.8	0.025	1.8	0.025
BGIOSGA001206	250	43	113	55	63	3.20798e-18	1	3.20798e-18	0.999841	1.22149e-06	0.999985
BGIOSGA001207	4856	4844	4137	4747	3726	0	1	0	1	0	1
BGIOSGA001208	1862	711	1943	566	435	8.24201e-248	1	8.24201e-248	1	5.98923e-61	1
BGIOSGA001209	441	324	625	795	541	3.24534e-64	1	3.24534e-64	1	1.01032e-80	1
BGIOSGA001210	1631	1580	1473	2350	1881	1.81595e-200	1	1.81595e-200	1	4.99276e-273	1
BGIOSGA001211	909	1351	1132	1554	1113	1.10889e-128	1	1.10889e-128	1	5.28163e-167	1
BGIOSGA001212	0	0	0	0	0	1.8	0.025	1.8	0.025	1.8	0.025
BGIOSGA001213	7	2	24	14	23	0.175907	0.750179	0.175907	0.321827	0.039628	0.916082
BGIOSGA001214	368	170	165	83	68	3.45312e-27	1	3.45312e-27	1	1.7145e-08	1
BGIOSGA001215	14	0	11	2	0	0.126572	0.802157	0.126572	0.025	1.8	0.025
BGIOSGA001216	17	0	0	4	0	1.8	0.025	1.8	0.025	1.8	0.025
BGIOSGA001217	0	0	0	0	0	1.8	0.025	1.8	0.025	1.8	0.025
BGIOSGA001218	4208	4520	4508	6008	5559	0	1	0	1	0	1
BGIOSGA001219	19	38	5	39	26	0.331829	0.614866	0.331829	0.998676	0.0014271	0.993975
BGIOSGA001220	870	1189	784	1138	1763	1.87033e-104	1	1.87033e-104	1	1.78051e-178	1
BGIOSGA001221	303	520	190	408	508	6.63871e-28	1	6.63871e-28	1	7.44542e-56	1
BGIOSGA001222	8	2	4	11	8	0.570822	0.455582	0.570822	0.312958	0.248323	0.68297
BGIOSGA001223	339	291	429	282	464	2.36759e-46	1	2.36759e-46	1	8.94151e-43	1
BGIOSGA001224	695	756	569	661	590	2.36254e-78	1	2.36254e-78	1	4.62542e-78	1
BGIOSGA001225	2270	4899	1995	6067	5022	1.29689e-277	1	1.29689e-277	1	0	1
BGIOSGA001226	2811	3438	2797	3101	2671	0	1	0	1	0	1
BGIOSGA001227	1	0	3	0	2	1.23681	0.163616	1.23681	0.025	1.8	0.025
BGIOSGA001228	0	0	0	0	0	1.8	0.025	1.8	0.025	1.8	0.025
BGIOSGA001229	992	351	1156	989	169	1.50243e-136	1	1.50243e-136	1	7.32483e-35	1
BGIOSGA001230	17	42	4	8	6	0.450082	0.530635	0.450082	0.835038	0.415457	0.554056
BGIOSGA001231	2	1	0	0	0	1.8	0.025	1.8	0.025	1.8	0.025
BGIOSGA001232	0	0	0	0	0	1.8	0.025	1.8	0.025	1.8	0.025
BGIOSGA001233	2652	2636	2719	2648	1001	0	1	0	1	9.22362e-188	1
BGIOSGA001234	52	388	93	249	393	1.47779e-07	0.999998	1.47779e-07	1	6.46506e-37	1
BGIOSGA001235	0	0	242	82	65	1.8	0.025	1.8	0.025	3.12624e-08	0.999999
BGIOSGA001236	23	177	26	84	148	0.00752474	0.976939	0.00752474	1	2.48251e-12	1
BGIOSGA001237	0	0	7	10	17	1.8	0.025	1.8	0.025	0.119074	0.81064
BGIOSGA001238	0	0	5	2	0	1.8	0.025	1.8	0.025	1.8	0.025
BGIOSGA001239	5	6	1	47	11	1.19607	0.177046	1.19607	0.742468	0.0359175	0.922116
BGIOSGA001240	0	0	0	0	0	1.8	0.025	1.8	0.025	1.8	0.025
BGIOSGA001241	7081	5823	7496	5520	3853	0	1	0	1	0	1
BGIOSGA001242	92	128	31	11	26	3.06081e-05	0.999759	3.06081e-05	0.94976	0.0621234	0.882386
BGIOSGA001243	28	299	18	147	108	0.0136966	0.963008	0.0136966	1	2.01514e-14	1
BGIOSGA001244	6902	8476	6958	9804	11753	0	1	0	1	0	1
BGIOSGA001245	0	0	8	20	27	1.8	0.025	1.8	0.025	0.0106143	0.969723
BGIOSGA001246	2	0	1	0	0	1.27917	0.150155	1.27917	0.025	1.8	0.025
BGIOSGA001247	0	0	0	0	4	1.8	0.025	1.8	0.025	1.8	0.025
BGIOSGA001248	0	0	0	0	0	1.8	0.025	1.8	0.025	1.8	0.025
BGIOSGA001249	106	94	111	67	96	1.74808e-12	1	1.74808e-12	1	5.58385e-09	1
BGIOSGA001250	191	140	194	174	130	8.97269e-23	1	8.97269e-23	1	2.20864e-17	1
BGIOSGA001251	0	0	0	0	0	1.8	0.025	1.8	0.025	1.8	0.025
BGIOSGA001252	0	0	0	0	0	1.8	0.025	1.8	0.025	1.8	0.025
BGIOSGA001253	0	0	0	0	2	1.8	0.025	1.8	0.025	1.8	0.025
BGIOSGA001254	1170	729	804	944	303	2.23869e-121	1	2.23869e-121	1	1.17375e-56	1
BGIOSGA001255	193	190	199	222	309	3.32594e-23	1	3.32594e-23	1	4.9847e-31	1
BGIOSGA001256	1628	1902	865	1636	1280	9.03807e-145	1	9.03807e-145	1	1.48332e-185	1
BGIOSGA001257	399	386	390	242	200	2.26916e-48	1	2.26916e-48	1	4.41943e-26	1
BGIOSGA001258	0	0	0	0	0	1.8	0.025	1.8	0.025	1.8	0.025
BGIOSGA001259	997	1702	2624	3080	3496	1.0229e-186	1	1.0229e-186	1	0	1
BGIOSGA001260	10	8	1	5	1	1.16034	0.189231	1.16034	0.510183	1.19607	0.177046
BGIOSGA001261	0	0	0	0	0	1.8	0.025	1.8	0.025	1.8	0.025
BGIOSGA001262	0	0	3	1	0	1.8	0.025	1.8	0.025	1.8	0.025
BGIOSGA001263	0	0	10	2	0	1.8	0.025	1.8	0.025	1.8	0.025
BGIOSGA001264	9	0	31	0	0	0.0876671	0.848359	0.0876671	0.025	1.8	0.025
BGIOSGA001265	93	65	48	10	6	3.63162e-07	0.999995	3.63162e-07	0.915011	0.362626	0.591715
BGIOSGA001266	104	45	139	18	4	9.4207e-14	1	9.4207e-14	0.982078	0.443592	0.534954
BGIOSGA001267	10	5	1	0	1	1.16034	0.189231	1.16034	0.025	1.8	0.025
BGIOSGA001268	0	0	135	189	198	1.8	0.025	1.8	0.025	6.92089e-23	1
BGIOSGA001269	1535	202	1930	746	216	3.93497e-222	1	3.93497e-222	1	9.3251e-41	1
BGIOSGA001270	2	1	6	0	2	0.91658	0.283096	0.91658	0.025	1.8	0.025
BGIOSGA001271	2	0	0	0	1	1.8	0.025	1.8	0.025	1.8	0.025
BGIOSGA001272	285	228	23	49	52	8.13949e-05	0.999447	8.13949e-05	1	1.06425e-05	0.999902
BGIOSGA001273	8	11	0	0	0	1.8	0.025	1.8	0.025	1.8	0.025
BGIOSGA001274	52	7	0	0	0	1.8	0.025	1.8	0.025	1.8	0.025
BGIOSGA001275	76	79	0	2	0	1.8	0.025	1.8	0.352309	1.8	0.025
BGIOSGA001276	2	9	2	0	1	1.11896	0.203818	1.11896	0.025	1.8	0.025
BGIOSGA001277	102	406	549	1765	791	3.07171e-20	1	3.07171e-20	1	8.04293e-140	1
BGIOSGA001278	0	0	2	0	0	1.8	0.025	1.8	0.025	1.8	0.025
BGIOSGA001279	28	38	37	19	48	0.00120645	0.99475	0.00120645	0.980704	0.00379716	0.986659
BGIOSGA001280	0	0	11	120	19	1.8	0.025	1.8	0.025	0.000957537	0.995659
BGIOSGA001281	44	4	2	6	0	0.776397	0.346645	0.776397	0.41823	1.8	0.025
BGIOSGA001282	0	0	0	0	0	1.8	0.025	1.8	0.025	1.8	0.025
BGIOSGA001283	942	1170	1677	1281	1131	6.04865e-155	1	6.04865e-155	1	2.81715e-154	1
BGIOSGA001284	5594	5989	5823	7709	4856	0	1	0	1	0	1
BGIOSGA001285	0	0	0	0	0	1.8	0.025	1.8	0.025	1.8	0.025
BGIOSGA001286	2649	2917	5	8	9	0.212369	0.715209	0.212369	0.891987	0.29469	0.644114
BGIOSGA001287	92	133	82	73	164	6.76311e-10	1	6.76311e-10	1	1.34867e-11	1
BGIOSGA001288	244	1050	650	2275	1822	2.74386e-43	1	2.74386e-43	1	3.70704e-264	1
BGIOSGA001289	0	0	0	0	0	1.8	0.025	1.8	0.025	1.8	0.025
BGIOSGA001290	0	0	0	0	0	1.8	0.025	1.8	0.025	1.8	0.025
BGIOSGA001291	0	0	2	0	0	1.8	0.025	1.8	0.025	1.8	0.025
BGIOSGA001292	0	0	0	2	0	1.8	0.025	1.8	0.025	1.8	0.025
BGIOSGA001293	0	0	0	0	0	1.8	0.025	1.8	0.025	1.8	0.025
BGIOSGA001294	102	4	11	4	2	0.0223039	0.945944	0.0223039	0.359719	0.979689	0.256893
BGIOSGA001295	75	312	183	218	229	3.07636e-12	1	3.07636e-12	1	1.25728e-26	1
BGIOSGA001296	0	0	0	0	0	1.8	0.025	1.8	0.025	1.8	0.025
BGIOSGA001297	914	1688	503	1375	1413	2.21675e-81	1	2.21675e-81	1	6.95129e-180	1
BGIOSGA001298	30	32	21	22	20	0.0070025	0.978221	0.0070025	0.983289	0.0172153	0.955778
BGIOSGA001299	362	1184	401	1672	1747	1.40078e-46	1	1.40078e-46	1	5.889e-222	1
BGIOSGA001300	26	194	10	51	67	0.0783484	0.86036	0.0783484	1	1.51319e-06	0.999982
BGIOSGA001301	0	0	0	0	0	1.8	0.025	1.8	0.025	1.8	0.025
BGIOSGA001302	2	5	0	11	9	1.8	0.025	1.8	0.555134	0.21617	0.711702
BGIOSGA001303	0	0	0	0	0	1.8	0.025	1.8	0.025	1.8	0.025
BGIOSGA001304	0	0	0	0	0	1.8	0.025	1.8	0.025	1.8	0.025
BGIOSGA001305	5	0	0	0	0	1.8	0.025	1.8	0.025	1.8	0.025
BGIOSGA001306	59	144	43	137	149	1.27982e-05	0.999886	1.27982e-05	1	1.22e-16	1
BGIOSGA001307	113	254	52	134	145	4.42005e-08	0.999999	4.42005e-08	1	3.23129e-16	1
BGIOSGA001308	945	1474	496	1514	1373	1.34767e-81	1	1.34767e-81	1	4.63408e-186	1
BGIOSGA001309	0	2	8	22	29	1.8	0.025	1.8	0.334559	0.00649069	0.979498
BGIOSGA001310	0	1	0	0	0	1.8	0.025	1.8	0.025	1.8	0.025
BGIOSGA001311	2756	3420	3355	4806	5187	0	1	0	1	0	1
BGIOSGA001312	74	105	46	81	103	2.06442e-06	0.999976	2.06442e-06	1	2.29278e-10	1
BGIOSGA001313	552	186	303	261	308	5.85856e-48	1	5.85856e-48	1	4.36161e-34	1
BGIOSGA001314	513	131	517	186	81	6.12841e-64	1	6.12841e-64	1	5.15777e-13	1
BGIOSGA001315	6166	5063	6500	7314	6944	0	1	0	1	0	1
BGIOSGA001316	96	121	89	96	139	1.44834e-10	1	1.44834e-10	1	4.23418e-13	1
BGIOSGA001317	6106	5470	6556	7825	4720	0	1	0	1	0	1
BGIOSGA001318	315	135	148	79	78	7.01512e-24	1	7.01512e-24	1	6.25974e-09	1
BGIOSGA001319	0	0	0	0	2	1.8	0.025	1.8	0.025	1.8	0.025
BGIOSGA001320	96	23	43	20	20	1.02465e-06	0.999987	1.02465e-06	0.959262	0.0215706	0.947323
BGIOSGA001321	26	4	77	38	30	0.000208318	0.998778	0.000208318	0.576657	0.000799405	0.996259
BGIOSGA001322	1053	1208	391	520	518	4.02869e-71	1	4.02869e-71	1	1.85164e-64	1
BGIOSGA001323	10158	11502	12124	17633	14183	0	1	0	1	0	1
BGIOSGA001324	0	1	1	0	0	1.8	0.025	1.8	0.025	1.8	0.025
BGIOSGA001325	429	279	380	296	90	1.79734e-49	1	1.79734e-49	1	4.5927e-16	1
BGIOSGA001326	78	69	67	196	45	3.51211e-08	0.999999	3.51211e-08	1	2.60646e-08	0.999999
BGIOSGA001327	8	4	6	2	0	0.415457	0.554056	0.415457	0.256893	1.8	0.025
BGIOSGA001328	5796	5051	4259	4696	5831	0	1	0	1	0	1
BGIOSGA001329	0	0	0	0	0	1.8	0.025	1.8	0.025	1.8	0.025
BGIOSGA001330	0	0	0	0	0	1.8	0.025	1.8	0.025	1.8	0.025
BGIOSGA001331	0	0	0	0	0	1.8	0.025	1.8	0.025	1.8	0.025
BGIOSGA001332	2	2	0	0	6	1.8	0.025	1.8	0.025	1.8	0.025
BGIOSGA001333	379	74	601	400	220	1.90901e-57	1	1.90901e-57	1	2.97438e-34	1
BGIOSGA001334	2003	3686	2298	3482	5782	7.27892e-280	1	7.27892e-280	1	0	1
BGIOSGA001335	2	0	2	0	0	1.11896	0.203818	1.11896	0.025	1.8	0.025
BGIOSGA001336	1	0	0	0	0	1.8	0.025	1.8	0.025	1.8	0.025
BGIOSGA001337	119	135	38	82	56	1.64179e-06	0.999981	1.64179e-06	1	1.53912e-07	0.999998
BGIOSGA001338	794	1321	813	1601	1680	1.21519e-101	1	1.21519e-101	1	1.04512e-212	1
BGIOSGA001339	0	0	0	0	0	1.8	0.025	1.8	0.025	1.8	0.025
BGIOSGA001340	1561	2094	2020	2777	2533	5.66904e-229	1	5.66904e-229	1	0	1
BGIOSGA001341	1	0	3	4	5	1.23681	0.163616	1.23681	0.025	0.684895	0.392573
BGIOSGA001342	8	0	4	4	14	0.570822	0.455582	0.570822	0.025	0.474646	0.514569
BGIOSGA001343	461	398	410	481	422	1.83574e-53	1	1.83574e-53	1	1.80004e-55	1
BGIOSGA001344	16	0	42	2	0	0.0101322	0.970813	0.0101322	0.025	1.8	0.025
BGIOSGA001345	0	0	0	0	0	1.8	0.025	1.8	0.025	1.8	0.025
BGIOSGA001346	616	631	879	558	391	2.90828e-91	1	2.90828e-91	1	8.57809e-57	1
BGIOSGA001347	2386	1915	1327	833	579	1.57804e-221	1	1.57804e-221	1	7.30945e-86	1
BGIOSGA001348	1	3	1	0	0	1.36961	0.123109	1.36961	0.025	1.8	0.025
BGIOSGA001349	119	650	62	111	105	2.76211e-09	1	2.76211e-09	1	2.02132e-12	1
BGIOSGA001350	75	60	9	6	6	0.0539676	0.89411	0.0539676	0.752885	0.49716	0.50022
BGIOSGA001351	376	396	302	373	515	9.43655e-41	1	9.43655e-41	1	2.7494e-53	1
BGIOSGA001352	1712	988	582	629	885	3.06463e-110	1	3.06463e-110	1	1.05196e-92	1
BGIOSGA001353	2	0	256	175	306	0.754291	0.357397	0.754291	0.025	1.54014e-26	1
BGIOSGA001354	6	2	1	4	8	1.18471	0.180878	1.18471	0.256893	0.570822	0.455582
BGIOSGA001355	5	8	0	3	1	1.8	0.025	1.8	0.386662	1.23681	0.163616
BGIOSGA001356	0	0	0	1	2	1.8	0.025	1.8	0.025	1.27917	0.150155
BGIOSGA001357	165	115	119	117	178	4.28916e-16	1	4.28916e-16	1	1.88919e-16	1
BGIOSGA001358	398	536	330	448	667	4.66238e-44	1	4.66238e-44	1	1.15038e-66	1
BGIOSGA001359	1946	969	1668	1650	1453	1.08443e-233	1	1.08443e-233	1	4.20816e-200	1
BGIOSGA001360	7	1	1	0	2	1.17627	0.183751	1.17627	0.025	1.8	0.025
BGIOSGA001361	0	0	0	0	0	1.8	0.025	1.8	0.025	1.8	0.025
BGIOSGA001362	0	3	0	2	2	1.8	0.025	1.8	0.235755	1.11896	0.203818
BGIOSGA001363	4230	6995	3701	7934	7740	0	1	0	1	0	1
BGIOSGA001364	2086	2021	3004	2552	2141	0	1	0	1	3.64168e-305	1
BGIOSGA001365	1525	1238	1096	1945	1674	4.01356e-164	1	4.01356e-164	1	4.23783e-234	1
BGIOSGA001366	1198	1469	1401	1620	1795	2.82097e-166	1	2.82097e-166	1	3.37112e-221	1
BGIOSGA001367	0	0	0	0	0	1.8	0.025	1.8	0.025	1.8	0.025
BGIOSGA001368	1	0	0	0	0	1.8	0.025	1.8	0.025	1.8	0.025
BGIOSGA001369	0	0	0	0	2	1.8	0.025	1.8	0.025	1.8	0.025
BGIOSGA001370	959	1389	631	1380	1637	4.30219e-96	1	4.30219e-96	1	9.84312e-194	1
BGIOSGA001371	0	0	0	0	0	1.8	0.025	1.8	0.025	1.8	0.025
BGIOSGA001372	1	0	701	625	575	1.11959	0.20359	1.11959	0.025	7.3326e-75	1
BGIOSGA001373	74	28	0	0	2	1.8	0.025	1.8	0.025	1.8	0.025
BGIOSGA001374	2114	1220	3559	2746	2921	0	1	0	1	0	1
BGIOSGA001375	118	516	1974	2445	1801	1.52809e-26	1	1.52809e-26	1	5.74896e-271	1
BGIOSGA001376	1640	3060	790	1156	767	2.3043e-136	1	2.3043e-136	1	2.71065e-117	1
BGIOSGA001377	0	0	0	0	0	1.8	0.025	1.8	0.025	1.8	0.025
BGIOSGA001378	0	0	0	0	0	1.8	0.025	1.8	0.025	1.8	0.025
BGIOSGA001379	0	0	0	0	0	1.8	0.025	1.8	0.025	1.8	0.025
BGIOSGA001380	0	0	0	0	0	1.8	0.025	1.8	0.025	1.8	0.025
BGIOSGA001381	0	0	0	0	0	1.8	0.025	1.8	0.025	1.8	0.025
BGIOSGA001382	0	0	2	0	0	1.8	0.025	1.8	0.025	1.8	0.025
BGIOSGA001383	0	0	0	0	0	1.8	0.025	1.8	0.025	1.8	0.025
BGIOSGA001384	0	0	0	0	0	1.8	0.025	1.8	0.025	1.8	0.025
BGIOSGA001385	0	2	0	0	0	1.8	0.025	1.8	0.025	1.8	0.025
BGIOSGA001386	47	3	0	0	0	1.8	0.025	1.8	0.025	1.8	0.025
BGIOSGA001387	314	142	246	78	44	3.06507e-33	1	3.06507e-33	1	2.33611e-06	0.999974
BGIOSGA001388	32656	36992	36304	34431	40470	0	1	0	1	0	1
BGIOSGA001389	339	107	87	71	80	4.06618e-16	1	4.06618e-16	1	1.50825e-08	1
BGIOSGA001390	38	0	0	0	0	1.8	0.025	1.8	0.025	1.8	0.025
BGIOSGA001391	2	0	0	1	0	1.8	0.025	1.8	0.025	1.8	0.025
BGIOSGA001392	7	0	0	0	0	1.8	0.025	1.8	0.025	1.8	0.025
BGIOSGA001393	0	0	0	0	0	1.8	0.025	1.8	0.025	1.8	0.025
BGIOSGA001394	0	1	0	0	0	1.8	0.025	1.8	0.025	1.8	0.025
BGIOSGA001395	0	0	0	0	3	1.8	0.025	1.8	0.025	1.8	0.025
BGIOSGA001396	0	0	1	1	0	1.8	0.025	1.8	0.025	1.8	0.025
BGIOSGA001397	4046	3255	4062	5189	4470	0	1	0	1	0	1
BGIOSGA001398	4	6	3	3	6	0.841121	0.316342	0.841121	0.359719	0.749572	0.359719
BGIOSGA001399	890	1121	1208	859	947	7.08452e-131	1	7.08452e-131	1	1.75418e-114	1
BGIOSGA001400	1926	2284	1937	2374	1953	8.17661e-252	1	8.17661e-252	1	3.21954e-280	1
BGIOSGA001401	4	0	1	1	0	1.21218	0.171677	1.21218	0.025	1.8	0.025
BGIOSGA001402	0	0	0	0	0	1.8	0.025	1.8	0.025	1.8	0.025
BGIOSGA001403	0	0	0	0	0	1.8	0.025	1.8	0.025	1.8	0.025
BGIOSGA001404	0	0	0	0	0	1.8	0.025	1.8	0.025	1.8	0.025
BGIOSGA001405	0	0	2	0	0	1.8	0.025	1.8	0.025	1.8	0.025
BGIOSGA001406	2	0	0	0	0	1.8	0.025	1.8	0.025	1.8	0.025
BGIOSGA001407	0	0	0	0	1	1.8	0.025	1.8	0.025	1.8	0.025
BGIOSGA001408	4	5	0	16	6	1.8	0.025	1.8	0.598431	0.278844	0.65708
BGIOSGA001409	2	1	9	6	8	0.867853	0.304316	0.867853	0.180878	0.415457	0.554056
BGIOSGA001410	0	0	0	0	0	1.8	0.025	1.8	0.025	1.8	0.025
BGIOSGA001411	0	0	0	0	0	1.8	0.025	1.8	0.025	1.8	0.025
BGIOSGA001412	1583	1209	2640	1808	1599	3.21689e-258	1	3.21689e-258	1	2.09394e-220	1
BGIOSGA001413	9296	11234	9610	13956	11616	0	1	0	1	0	1
BGIOSGA001414	407	580	433	466	443	1.32051e-51	1	1.32051e-51	1	4.53432e-56	1
BGIOSGA001415	0	0	1	1	0	1.8	0.025	1.8	0.025	1.8	0.025
BGIOSGA001416	225	115	101	111	171	3.11191e-16	1	3.11191e-16	1	1.19667e-15	1
BGIOSGA001417	6747	6840	9083	8620	7045	0	1	0	1	0	1
BGIOSGA001418	0	0	0	0	0	1.8	0.025	1.8	0.025	1.8	0.025
BGIOSGA001419	1517	2517	1739	2554	2747	3.76389e-210	1	3.76389e-210	1	0	1
BGIOSGA001420	3	25	4	6	33	0.841121	0.316342	0.841121	0.701907	0.204491	0.722554
BGIOSGA001421	0	0	0	0	0	1.8	0.025	1.8	0.025	1.8	0.025
BGIOSGA001422	1703	609	2126	846	715	2.11135e-246	1	2.11135e-246	1	6.55043e-98	1
BGIOSGA001423	32	0	59	16	4	0.000106985	0.999303	0.000106985	0.025	0.457324	0.525853
BGIOSGA001424	220	147	575	444	120	1.2793e-38	1	1.2793e-38	1	2.47877e-22	1
BGIOSGA001425	0	0	36	46	11	1.8	0.025	1.8	0.025	0.0365357	0.921099
BGIOSGA001426	320	169	406	303	364	1.10184e-43	1	1.10184e-43	1	3.29048e-40	1
BGIOSGA001427	272	441	684	483	564	1.06479e-47	1	1.06479e-47	1	1.23006e-64	1
BGIOSGA001428	144	185	262	320	238	5.98436e-22	1	5.98436e-22	1	7.12722e-33	1
BGIOSGA001429	1763	1614	1877	1531	1299	1.25849e-236	1	1.25849e-236	1	1.88673e-181	1
BGIOSGA001430	361	135	362	234	222	3.82091e-44	1	3.82091e-44	1	3.45341e-27	1
BGIOSGA001431	302	1075	401	1297	895	5.66124e-42	1	5.66124e-42	1	2.07207e-135	1
BGIOSGA001432	46	194	47	173	194	2.96707e-05	0.999765	2.96707e-05	1	1.39066e-21	1
BGIOSGA001433	2796	3665	1890	4493	4081	2.48412e-295	1	2.48412e-295	1	0	1
BGIOSGA001434	0	0	0	0	0	1.8	0.025	1.8	0.025	1.8	0.025
BGIOSGA001435	0	0	0	0	0	1.8	0.025	1.8	0.025	1.8	0.025
BGIOSGA001436	0	0	0	0	0	1.8	0.025	1.8	0.025	1.8	0.025
BGIOSGA001437	56	269	25	255	62	0.000616555	0.996982	0.000616555	1	1.91821e-11	1
BGIOSGA001438	0	0	0	0	0	1.8	0.025	1.8	0.025	1.8	0.025
BGIOSGA001439	13652	8264	14338	10257	7354	0	1	0	1	0	1
BGIOSGA001440	4133	6436	4172	6713	5983	0	1	0	1	0	1
BGIOSGA001441	1481	1430	1352	1773	1750	1.58259e-182	1	1.58259e-182	1	5.10251e-229	1
BGIOSGA001442	1607	3256	1090	2231	2967	2.94354e-167	1	2.94354e-167	1	0	1
BGIOSGA001443	0	0	0	0	0	1.8	0.025	1.8	0.025	1.8	0.025
BGIOSGA001444	312	1200	412	2209	1760	2.52357e-43	1	2.52357e-43	1	1.61044e-255	1
BGIOSGA001445	0	0	0	0	0	1.8	0.025	1.8	0.025	1.8	0.025
BGIOSGA001446	0	0	0	0	0	1.8	0.025	1.8	0.025	1.8	0.025
BGIOSGA001447	5	1	0	0	0	1.8	0.025	1.8	0.025	1.8	0.025
BGIOSGA001448	14	117	25	137	227	0.0349168	0.923772	0.0349168	1	4.2761e-20	1
BGIOSGA001449	97	107	48	54	86	2.85922e-07	0.999996	2.85922e-07	0.999999	1.62667e-07	0.999997
BGIOSGA001450	729	772	538	986	1253	1.72646e-77	1	1.72646e-77	1	2.66631e-141	1
BGIOSGA001451	737	696	689	743	475	1.14783e-89	1	1.14783e-89	1	2.50649e-72	1
BGIOSGA001452	1285	564	1431	672	584	1.34241e-174	1	1.34241e-174	1	3.0074e-78	1
BGIOSGA001453	278	516	403	435	604	5.3939e-40	1	5.3939e-40	1	9.66842e-63	1
BGIOSGA001454	453	2010	1354	3284	3373	2.65656e-85	1	2.65656e-85	1	0	1
BGIOSGA001455	55	2	20	0	0	0.0022633	0.991223	0.0022633	0.025	1.8	0.025
BGIOSGA001456	0	0	11	0	0	1.8	0.025	1.8	0.025	1.8	0.025
BGIOSGA001457	0	0	0	0	0	1.8	0.025	1.8	0.025	1.8	0.025
BGIOSGA001458	0	0	0	0	0	1.8	0.025	1.8	0.025	1.8	0.025
BGIOSGA001459	0	0	0	0	0	1.8	0.025	1.8	0.025	1.8	0.025
BGIOSGA001460	0	0	78	16	0	1.8	0.025	1.8	0.025	1.8	0.025
BGIOSGA001461	389	8	130	27	0	4.5309e-23	1	4.5309e-23	0.80288	1.8	0.025
BGIOSGA001462	245	268	195	301	416	7.52086e-26	1	7.52086e-26	1	1.39943e-42	1
BGIOSGA001463	72	89	53	103	130	6.6107e-07	0.999991	6.6107e-07	1	2.89619e-13	1
BGIOSGA001464	42	73	26	31	43	0.00113639	0.995002	0.00113639	0.99955	0.000427472	0.997773
BGIOSGA001465	0	0	0	0	1	1.8	0.025	1.8	0.025	1.8	0.025
BGIOSGA001466	60	47	113	33	71	6.45752e-09	1	6.45752e-09	0.998753	4.29547e-05	0.999678
BGIOSGA001467	960	2703	882	2712	2384	6.3615e-117	1	6.3615e-117	1	0	1
BGIOSGA001468	158	20	124	33	22	3.54789e-16	1	3.54789e-16	0.979043	0.00464227	0.984319
BGIOSGA001469	273	271	393	504	440	4.01549e-39	1	4.01549e-39	1	4.33997e-58	1
BGIOSGA001470	0	0	207	665	594	1.8	0.025	1.8	0.025	1.38422e-78	1
BGIOSGA001471	0	0	0	0	0	1.8	0.025	1.8	0.025	1.8	0.025
BGIOSGA001472	0	0	20	59	19	1.8	0.025	1.8	0.025	0.00261664	0.990126
BGIOSGA001473	0	0	0	0	0	1.8	0.025	1.8	0.025	1.8	0.025
BGIOSGA001474	0	0	0	0	0	1.8	0.025	1.8	0.025	1.8	0.025
BGIOSGA001475	20	2	17	13	38	0.0315815	0.929389	0.0315815	0.31927	0.0250099	0.940955
BGIOSGA001476	726	1047	730	1100	939	9.72314e-92	1	9.72314e-92	1	2.54837e-129	1
BGIOSGA001477	1130	1038	855	1076	1447	4.53241e-124	1	4.53241e-124	1	1.19906e-158	1
BGIOSGA001478	0	0	0	0	0	1.8	0.025	1.8	0.025	1.8	0.025
BGIOSGA001479	6	2	13	0	2	0.311609	0.630598	0.311609	0.025	1.8	0.025
BGIOSGA001480	10419	8429	12931	10472	6573	0	1	0	1	0	1
BGIOSGA001481	3	0	0	1	0	1.8	0.025	1.8	0.025	1.8	0.025
BGIOSGA001482	0	0	0	0	0	1.8	0.025	1.8	0.025	1.8	0.025
BGIOSGA001483	0	0	0	0	0	1.8	0.025	1.8	0.025	1.8	0.025
BGIOSGA001484	0	3	0	2	0	1.8	0.025	1.8	0.235755	1.8	0.025
BGIOSGA001485	0	0	2	0	3	1.8	0.025	1.8	0.025	1.8	0.025
BGIOSGA001486	0	0	0	0	0	1.8	0.025	1.8	0.025	1.8	0.025
BGIOSGA001487	1312	1046	573	1264	774	6.92684e-101	1	6.92684e-101	1	2.6411e-122	1
BGIOSGA001488	0	0	0	0	0	1.8	0.025	1.8	0.025	1.8	0.025
BGIOSGA001489	0	0	0	0	1	1.8	0.025	1.8	0.025	1.8	0.025
BGIOSGA001490	6	8	1	14	4	1.18471	0.180878	1.18471	0.72373	0.474646	0.514569
BGIOSGA001491	30	46	13	42	25	0.0333953	0.926315	0.0333953	0.999587	0.0013773	0.994148
BGIOSGA001492	697	1053	173	1171	442	2.08246e-33	1	2.08246e-33	1	1.89578e-80	1
BGIOSGA001493	512	577	359	609	383	6.35804e-52	1	6.35804e-52	1	3.82343e-58	1
BGIOSGA001494	21	55	8	29	8	0.149073	0.777686	0.149073	0.998522	0.120472	0.809045
BGIOSGA001495	3321	4929	2364	5852	6783	0	1	0	1	0	1
BGIOSGA001496	228	156	223	184	260	6.84449e-27	1	6.84449e-27	1	1.21431e-25	1
BGIOSGA001497	19	27	14	23	25	0.0533518	0.895015	0.0533518	0.978776	0.0083871	0.974865
BGIOSGA001498	337	595	222	478	577	3.33845e-32	1	3.33845e-32	1	5.8474e-65	1
BGIOSGA001499	176	298	343	524	429	8.65553e-28	1	8.65553e-28	1	2.43948e-58	1
BGIOSGA001500	4	17	17	8	13	0.450082	0.530635	0.450082	0.751769	0.215945	0.711909
BGIOSGA001501	2	6	0	6	0	1.8	0.025	1.8	0.50022	1.8	0.025
BGIOSGA001502	13	23	4	7	2	0.48512	0.507851	0.48512	0.746083	0.896423	0.291767
BGIOSGA001503	5265	4358	3694	4726	3398	0	1	0	1	0	1
BGIOSGA001504	927	326	913	425	561	5.30385e-117	1	5.30385e-117	1	7.13099e-60	1
BGIOSGA001505	0	0	0	0	0	1.8	0.025	1.8	0.025	1.8	0.025
BGIOSGA001506	2258	2365	869	2163	883	2.06632e-161	1	2.06632e-161	1	2.76315e-161	1
BGIOSGA001507	0	0	0	0	0	1.8	0.025	1.8	0.025	1.8	0.025
BGIOSGA001508	0	0	0	0	0	1.8	0.025	1.8	0.025	1.8	0.025
BGIOSGA001509	0	0	0	0	0	1.8	0.025	1.8	0.025	1.8	0.025
BGIOSGA001510	188	47	64	11	111	6.16259e-11	1	6.16259e-11	0.922116	0.0214872	0.94748
BGIOSGA001511	0	0	0	0	0	1.8	0.025	1.8	0.025	1.8	0.025
BGIOSGA001512	9	0	0	0	0	1.8	0.025	1.8	0.025	1.8	0.025
BGIOSGA001513	75	39	0	0	0	1.8	0.025	1.8	0.025	1.8	0.025
BGIOSGA001514	0	0	0	0	0	1.8	0.025	1.8	0.025	1.8	0.025
BGIOSGA001515	1304	697	0	4	0	1.8	0.025	1.8	0.616911	1.8	0.025
BGIOSGA001516	64	147	104	135	63	5.12473e-09	1	5.12473e-09	1	8.41371e-10	1
BGIOSGA001517	102	151	204	129	169	8.1204e-16	1	8.1204e-16	1	4.46908e-17	1
BGIOSGA001518	0	0	0	1	0	1.8	0.025	1.8	0.025	1.8	0.025
BGIOSGA001519	115	140	301	219	263	1.51632e-19	1	1.51632e-19	1	1.37542e-28	1
BGIOSGA001520	3	6	4	16	20	0.841121	0.316342	0.841121	0.65708	0.036337	0.921425
BGIOSGA001521	1707	1071	1382	1115	907	1.01729e-197	1	1.01729e-197	1	1.27472e-127	1
BGIOSGA001522	249	214	192	179	177	8.30124e-26	1	8.30124e-26	1	5.63297e-21	1
BGIOSGA001523	2	0	0	0	0	1.8	0.025	1.8	0.025	1.8	0.025
BGIOSGA001524	2	6	0	8	3	1.8	0.025	1.8	0.554056	0.696254	0.386662
BGIOSGA001525	16	0	2	0	0	0.819915	0.326082	0.819915	0.025	1.8	0.025
BGIOSGA001526	0	0	0	1	0	1.8	0.025	1.8	0.025	1.8	0.025
BGIOSGA001527	0	0	0	0	2	1.8	0.025	1.8	0.025	1.8	0.025
BGIOSGA001528	2	7	4	1	2	0.979689	0.256893	0.979689	0.183751	1.27917	0.150155
BGIOSGA001529	0	1	0	0	2	1.8	0.025	1.8	0.025	1.8	0.025
BGIOSGA001530	0	0	0	0	0	1.8	0.025	1.8	0.025	1.8	0.025
BGIOSGA001531	0	0	0	0	0	1.8	0.025	1.8	0.025	1.8	0.025
BGIOSGA001532	0	0	0	0	0	1.8	0.025	1.8	0.025	1.8	0.025
BGIOSGA001533	305	438	340	417	569	4.84324e-39	1	4.84324e-39	1	1.43097e-59	1
BGIOSGA001534	0	0	0	3	0	1.8	0.025	1.8	0.025	1.8	0.025
BGIOSGA001535	205	174	105	151	242	3.62788e-16	1	3.62788e-16	1	5.79565e-22	1
BGIOSGA001536	4324	3528	5132	3726	6009	0	1	0	1	0	1
BGIOSGA001537	875	2713	723	2245	2479	4.09556e-100	1	4.09556e-100	1	0	1
BGIOSGA001538	1495	1710	1680	1592	1876	4.99426e-205	1	4.99426e-205	1	8.64913e-224	1
BGIOSGA001539	886	814	705	997	856	2.98949e-99	1	2.98949e-99	1	3.69544e-117	1
BGIOSGA001540	2800	2342	2795	3088	2743	0	1	0	1	0	1
BGIOSGA001541	138	119	214	122	154	1.02553e-19	1	1.02553e-19	1	7.79694e-16	1
BGIOSGA001542	225	75	37	7	2	3.41636e-07	0.999995	3.41636e-07	0.817029	0.896423	0.291767
BGIOSGA001543	2225	2954	2162	2999	3271	6.06321e-287	1	6.06321e-287	1	0	1
BGIOSGA001544	1680	2290	2046	2705	2866	3.21187e-240	1	3.21187e-240	1	0	1
BGIOSGA001545	437	611	752	586	729	7.5785e-69	1	7.5785e-69	1	1.72678e-81	1
BGIOSGA001546	2677	7982	3779	7656	8128	0	1	0	1	0	1
BGIOSGA001547	3005	3227	2356	3247	3050	0	1	0	1	0	1
BGIOSGA001548	2055	351	450	830	743	4.29277e-93	1	4.29277e-93	1	4.18337e-99	1
BGIOSGA001549	296	45	358	225	101	2.31828e-39	1	2.31828e-39	1	3.11191e-16	1
BGIOSGA001550	0	0	0	0	0	1.8	0.025	1.8	0.025	1.8	0.025
BGIOSGA001551	6	0	0	0	0	1.8	0.025	1.8	0.025	1.8	0.025
BGIOSGA001552	46	101	113	95	121	2.09941e-07	0.999997	2.09941e-07	1	3.04272e-12	1
BGIOSGA001553	0	0	0	0	0	1.8	0.025	1.8	0.025	1.8	0.025
BGIOSGA001554	10	0	3	4	11	0.661433	0.40498	0.661433	0.025	0.511143	0.491482
BGIOSGA001555	0	0	1	0	0	1.8	0.025	1.8	0.025	1.8	0.025
BGIOSGA001556	18	0	13	2	2	0.0675075	0.874901	0.0675075	0.025	1.11896	0.203818
BGIOSGA001557	1358	118	147	100	30	6.68594e-32	1	6.68594e-32	1	3.2395e-05	0.999747
BGIOSGA001558	1081	1179	1041	1161	1815	1.31717e-135	1	1.31717e-135	1	7.17566e-183	1
BGIOSGA001559	0	0	0	0	0	1.8	0.025	1.8	0.025	1.8	0.025
BGIOSGA001560	46	11	3	7	0	0.536575	0.475914	0.536575	0.648447	1.8	0.025
BGIOSGA001561	0	0	0	0	1	1.8	0.025	1.8	0.025	1.8	0.025
BGIOSGA001562	498	810	456	632	660	6.75565e-59	1	6.75565e-59	1	5.80431e-81	1
BGIOSGA001563	91	106	81	82	90	8.88296e-10	1	8.88296e-10	1	8.634e-10	1
BGIOSGA001564	543	1866	247	1089	758	2.45133e-41	1	2.45133e-41	1	1.47759e-113	1
BGIOSGA001565	0	0	0	0	0	1.8	0.025	1.8	0.025	1.8	0.025
BGIOSGA001566	384	394	334	295	392	1.3334e-43	1	1.3334e-43	1	5.74148e-41	1
BGIOSGA001567	675	233	349	138	302	7.84248e-57	1	7.84248e-57	1	2.14843e-22	1
BGIOSGA001568	35	69	61	71	138	4.98388e-05	0.999635	4.98388e-05	0.999999	9.89711e-11	1
BGIOSGA001569	1569	589	871	725	637	1.68466e-143	1	1.68466e-143	1	3.29654e-85	1
BGIOSGA001570	0	0	0	0	0	1.8	0.025	1.8	0.025	1.8	0.025
BGIOSGA001571	0	0	0	0	0	1.8	0.025	1.8	0.025	1.8	0.025
BGIOSGA001572	205	195	246	194	179	1.1625e-26	1	1.1625e-26	1	5.42085e-22	1
BGIOSGA001573	2239	2606	2591	3465	3109	0	1	0	1	0	1
BGIOSGA001574	5	1	3	6	3	0.788412	0.340888	0.788412	0.180878	0.749572	0.359719
BGIOSGA001575	0	0	0	0	0	1.8	0.025	1.8	0.025	1.8	0.025
BGIOSGA001576	679	2936	2783	4664	4461	1.01601e-139	1	1.01601e-139	1	0	1
BGIOSGA001577	0	5	7	12	7	1.8	0.025	1.8	0.566124	0.272019	0.662762
BGIOSGA001578	184	465	268	272	696	5.58091e-26	1	5.58091e-26	1	6.03729e-48	1
BGIOSGA001579	75	135	25	77	80	0.0002949	0.998366	0.0002949	1	6.30291e-09	1
BGIOSGA001580	790	676	680	739	657	4.06196e-92	1	4.06196e-92	1	1.71849e-87	1
BGIOSGA001581	11	9	2	3	11	0.848581	0.312958	0.848581	0.396619	0.648203	0.412098
BGIOSGA001582	41	27	10	12	19	0.0538806	0.894237	0.0538806	0.903633	0.0737515	0.866444
BGIOSGA001583	0	0	0	0	0	1.8	0.025	1.8	0.025	1.8	0.025
BGIOSGA001584	109	193	49	650	97	1.16146e-07	0.999998	1.16146e-07	1	7.69054e-20	1
BGIOSGA001585	660	191	718	306	295	1.81266e-86	1	1.81266e-86	1	2.37812e-36	1
BGIOSGA001586	0	0	0	0	0	1.8	0.025	1.8	0.025	1.8	0.025
BGIOSGA001587	78	7	130	71	78	3.5547e-11	1	3.5547e-11	0.815204	1.91901e-08	1
BGIOSGA001588	0	0	0	0	0	1.8	0.025	1.8	0.025	1.8	0.025
BGIOSGA001589	0	0	0	0	0	1.8	0.025	1.8	0.025	1.8	0.025
BGIOSGA001590	191	321	190	383	498	1.5855e-22	1	1.5855e-22	1	2.47957e-53	1
BGIOSGA001591	0	1	0	0	0	1.8	0.025	1.8	0.025	1.8	0.025
BGIOSGA001592	0	0	0	0	0	1.8	0.025	1.8	0.025	1.8	0.025
BGIOSGA001593	50	76	37	102	41	8.21518e-05	0.999442	8.21518e-05	1	1.30094e-06	0.999984
BGIOSGA001594	19	0	2	0	0	0.809501	0.330932	0.809501	0.025	1.8	0.025
BGIOSGA001595	5	0	2	2	2	0.943133	0.271899	0.943133	0.025	1.11896	0.203818
BGIOSGA001596	0	0	0	0	0	1.8	0.025	1.8	0.025	1.8	0.025
BGIOSGA001597	0	0	0	0	0	1.8	0.025	1.8	0.025	1.8	0.025
BGIOSGA001598	0	0	0	0	0	1.8	0.025	1.8	0.025	1.8	0.025
BGIOSGA001599	0	0	0	0	0	1.8	0.025	1.8	0.025	1.8	0.025
BGIOSGA001600	0	0	0	0	0	1.8	0.025	1.8	0.025	1.8	0.025
BGIOSGA001601	8	0	0	0	0	1.8	0.025	1.8	0.025	1.8	0.025
BGIOSGA001602	0	0	0	0	0	1.8	0.025	1.8	0.025	1.8	0.025
BGIOSGA001603	179	17	71	33	44	1.13026e-11	1	1.13026e-11	0.966487	0.000279361	0.998438
BGIOSGA001604	0	0	0	0	0	1.8	0.025	1.8	0.025	1.8	0.025
BGIOSGA001605	0	0	0	0	0	1.8	0.025	1.8	0.025	1.8	0.025
BGIOSGA001606	0	0	0	0	0	1.8	0.025	1.8	0.025	1.8	0.025
BGIOSGA001607	0	4	0	0	0	1.8	0.025	1.8	0.025	1.8	0.025
BGIOSGA001608	1447	386	412	776	126	2.12656e-80	1	2.12656e-80	1	8.34463e-26	1
BGIOSGA001609	1725	1992	2026	2333	2452	1.09724e-242	1	1.09724e-242	1	0	1
BGIOSGA001610	66	184	59	155	202	4.75216e-07	0.999993	4.75216e-07	1	1.17745e-20	1
BGIOSGA001611	1761	1028	609	592	514	4.95019e-115	1	4.95019e-115	1	1.61374e-68	1
BGIOSGA001612	0	0	0	0	0	1.8	0.025	1.8	0.025	1.8	0.025
BGIOSGA001613	0	1	0	1	0	1.8	0.025	1.8	0.123109	1.8	0.025
BGIOSGA001614	2259	2072	1877	2254	2861	9.04616e-268	1	9.04616e-268	1	0	1
BGIOSGA001615	2555	8636	2421	7844	9530	0	1	0	1	0	1
BGIOSGA001616	0	0	0	0	0	1.8	0.025	1.8	0.025	1.8	0.025
BGIOSGA001617	0	0	0	0	0	1.8	0.025	1.8	0.025	1.8	0.025
BGIOSGA001618	54	78	34	62	75	0.000100816	0.999337	0.000100816	0.999999	1.07918e-07	0.999998
BGIOSGA001619	0	6	0	4	3	1.8	0.025	1.8	0.41823	0.841121	0.316342
BGIOSGA001620	3523	8434	2878	7994	5883	0	1	0	1	0	1
BGIOSGA001621	14	0	4	1	0	0.474646	0.514569	0.474646	0.025	1.8	0.025
BGIOSGA001622	48	66	30	53	47	0.000341116	0.998155	0.000341116	0.999985	1.25519e-05	0.999888
BGIOSGA001623	0	0	192	1	0	1.8	0.025	1.8	0.025	1.8	0.025
BGIOSGA001624	1	0	0	0	0	1.8	0.025	1.8	0.025	1.8	0.025
BGIOSGA001625	0	0	1	0	0	1.8	0.025	1.8	0.025	1.8	0.025
BGIOSGA001626	2736	562	1015	163	42	1.75303e-191	1	1.75303e-191	1	1.44403e-07	0.999998
BGIOSGA001627	1877	1310	2350	549	643	1.07201e-272	1	1.07201e-272	1	5.42145e-74	1
BGIOSGA001628	7	32	20	30	36	0.195007	0.731546	0.195007	0.993685	0.000976442	0.995588
BGIOSGA001629	497	225	360	41	31	2.42371e-51	1	2.42371e-51	0.999999	0.000512438	0.997411
BGIOSGA001630	0	0	0	0	0	1.8	0.025	1.8	0.025	1.8	0.025
BGIOSGA001631	1039	423	1251	763	340	1.71098e-145	1	1.71098e-145	1	3.67408e-58	1
BGIOSGA001632	2	0	4	0	0	0.979689	0.256893	0.979689	0.025	1.8	0.025
BGIOSGA001633	15508	18929	11328	20882	18177	0	1	0	1	0	1
BGIOSGA001634	0	0	0	0	0	1.8	0.025	1.8	0.025	1.8	0.025
BGIOSGA001635	0	0	0	0	0	1.8	0.025	1.8	0.025	1.8	0.025
BGIOSGA001636	2243	4440	1472	3745	3924	3.59305e-231	1	3.59305e-231	1	0	1
BGIOSGA001637	334	108	116	76	71	2.93614e-20	1	2.93614e-20	1	2.45709e-08	1
BGIOSGA001638	48	83	59	96	76	5.58059e-06	0.999944	5.58059e-06	1	1.12563e-09	1
BGIOSGA001639	1639	1777	1345	1921	1718	4.65299e-191	1	4.65299e-191	1	4.85707e-236	1
BGIOSGA001640	522	288	332	388	405	7.7329e-50	1	7.7329e-50	1	1.30524e-48	1
BGIOSGA001641	198	57	98	126	74	3.197e-15	1	3.197e-15	1	1.14115e-10	1
BGIOSGA001642	166	330	133	501	219	3.04325e-17	1	3.04325e-17	1	6.60946e-37	1
BGIOSGA001643	0	0	0	0	0	1.8	0.025	1.8	0.025	1.8	0.025
BGIOSGA001644	6	21	11	25	13	0.342764	0.606537	0.342764	0.968837	0.0424899	0.911537
BGIOSGA001645	0	0	0	0	0	1.8	0.025	1.8	0.025	1.8	0.025
BGIOSGA001646	2	0	0	0	0	1.8	0.025	1.8	0.025	1.8	0.025
BGIOSGA001647	0	0	0	0	0	1.8	0.025	1.8	0.025	1.8	0.025
BGIOSGA001648	5	6	0	1	0	1.8	0.025	1.8	0.180878	1.8	0.025
BGIOSGA001649	0	0	0	0	0	1.8	0.025	1.8	0.025	1.8	0.025
BGIOSGA001650	0	0	0	0	0	1.8	0.025	1.8	0.025	1.8	0.025
BGIOSGA001651	0	0	0	0	0	1.8	0.025	1.8	0.025	1.8	0.025
BGIOSGA001652	171	120	404	632	473	9.4395e-29	1	9.4395e-29	1	2.52548e-67	1
BGIOSGA001653	0	0	0	0	0	1.8	0.025	1.8	0.025	1.8	0.025
BGIOSGA001654	0	0	0	0	0	1.8	0.025	1.8	0.025	1.8	0.025
BGIOSGA001655	0	0	0	0	0	1.8	0.025	1.8	0.025	1.8	0.025
BGIOSGA001656	0	0	0	0	0	1.8	0.025	1.8	0.025	1.8	0.025
BGIOSGA001657	23	45	41	60	45	0.00218905	0.991458	0.00218905	0.999922	8.26306e-06	0.999922
BGIOSGA001658	249	338	601	426	304	6.06815e-43	1	6.06815e-43	1	2.74739e-43	1
BGIOSGA001659	4	7	17	8	6	0.450082	0.530635	0.450082	0.589821	0.415457	0.554056
BGIOSGA001660	134	190	120	144	236	1.12265e-14	1	1.12265e-14	1	4.39741e-21	1
BGIOSGA001661	322	10	246	12	6	1.26213e-33	1	1.26213e-33	0.752885	0.325973	0.619377
BGIOSGA001662	816	707	940	1032	1129	6.85263e-111	1	6.85263e-111	1	5.94653e-138	1
BGIOSGA001663	8252	3538	10123	7490	5412	0	1	0	1	0	1
BGIOSGA001664	7	2	4	12	18	0.60004	0.438778	0.60004	0.316342	0.0791452	0.859317
BGIOSGA001665	0	0	7	11	8	1.8	0.025	1.8	0.025	0.248323	0.68297
BGIOSGA001666	0	0	0	0	0	1.8	0.025	1.8	0.025	1.8	0.025
BGIOSGA001667	0	0	107	17	7	1.8	0.025	1.8	0.025	0.215384	0.712425
BGIOSGA001668	23	14	0	0	0	1.8	0.025	1.8	0.025	1.8	0.025
BGIOSGA001669	28	6	4	1	2	0.403128	0.562628	0.403128	0.180878	1.27917	0.150155
BGIOSGA001670	1	2	2	1	0	1.27917	0.150155	1.27917	0.150155	1.8	0.025
BGIOSGA001671	450	142	163	247	258	1.25261e-28	1	1.25261e-28	1	2.83993e-30	1
BGIOSGA001672	1	0	2	0	0	1.27917	0.150155	1.27917	0.025	1.8	0.025
BGIOSGA001673	450	166	336	261	91	4.01411e-47	1	4.01411e-47	1	1.09038e-15	1
BGIOSGA001674	4130	3260	6410	4620	3201	0	1	0	1	0	1
BGIOSGA001675	0	0	0	0	0	1.8	0.025	1.8	0.025	1.8	0.025
BGIOSGA001676	4	21	2	14	11	0.979689	0.256893	0.979689	0.906684	0.126572	0.802157
BGIOSGA001677	0	4	0	3	0	1.8	0.025	1.8	0.316342	1.8	0.025
BGIOSGA001678	549	749	333	664	527	5.89573e-51	1	5.89573e-51	1	2.20369e-73	1
BGIOSGA001679	0	0	0	0	0	1.8	0.025	1.8	0.025	1.8	0.025
BGIOSGA001680	294	611	150	664	423	1.53649e-23	1	1.53649e-23	1	3.58834e-64	1
BGIOSGA001681	1368	2225	1147	2459	1823	1.88303e-160	1	1.88303e-160	1	1.33596e-273	1
BGIOSGA001682	1330	1430	1363	1895	2022	1.45885e-173	1	1.45885e-173	1	3.6655e-255	1
BGIOSGA001683	1	5	3	9	5	1.23681	0.163616	1.23681	0.52765	0.454596	0.52765
BGIOSGA001684	0	0	0	0	1	1.8	0.025	1.8	0.025	1.8	0.025
BGIOSGA001685	228	475	334	547	480	1.26544e-32	1	1.26544e-32	1	1.8384e-63	1
BGIOSGA001686	198	232	205	223	201	6.90149e-24	1	6.90149e-24	1	3.91329e-25	1
BGIOSGA001687	181	303	147	342	327	4.96412e-19	1	4.96412e-19	1	1.13553e-40	1
BGIOSGA001688	0	0	1	2	1	1.8	0.025	1.8	0.025	1.27917	0.150155
BGIOSGA001689	544	372	90	96	119	4.50302e-18	1	4.50302e-18	1	3.18482e-12	1
BGIOSGA001690	0	0	0	0	0	1.8	0.025	1.8	0.025	1.8	0.025
BGIOSGA001691	0	0	0	0	0	1.8	0.025	1.8	0.025	1.8	0.025
BGIOSGA001692	0	0	0	0	0	1.8	0.025	1.8	0.025	1.8	0.025
BGIOSGA001693	0	0	0	0	0	1.8	0.025	1.8	0.025	1.8	0.025
BGIOSGA001694	0	0	0	0	0	1.8	0.025	1.8	0.025	1.8	0.025
BGIOSGA001695	0	0	0	0	0	1.8	0.025	1.8	0.025	1.8	0.025
BGIOSGA001696	0	0	0	0	0	1.8	0.025	1.8	0.025	1.8	0.025
BGIOSGA001697	29	158	36	19	12	0.00113486	0.995008	0.00113486	0.996549	0.0737515	0.866444
BGIOSGA001698	0	0	0	0	0	1.8	0.025	1.8	0.025	1.8	0.025
BGIOSGA001699	2065	1582	1530	2190	1387	1.61366e-228	1	1.61366e-228	1	1.41238e-220	1
BGIOSGA001700	128531	39612	378397	105501	165545	0	1	0	1	0	1
BGIOSGA001701	7	46	21	129	86	0.189531	0.736814	0.189531	0.999998	7.42254e-12	1
BGIOSGA001702	43	394	204	1658	1175	4.65801e-08	0.999999	4.65801e-08	1	1.97882e-177	1
BGIOSGA001703	79	50	114	608	178	1.1145e-10	1	1.1145e-10	1	3.53786e-33	1
BGIOSGA001704	31	8	14	5	4	0.0255071	0.940054	0.0255071	0.510183	0.684895	0.392573
BGIOSGA001705	1631	1783	1811	1837	1383	5.63116e-223	1	5.63116e-223	1	1.77227e-204	1
BGIOSGA001706	266	172	305	262	277	2.72734e-34	1	2.72734e-34	1	2.08319e-32	1
BGIOSGA001707	0	0	1	0	0	1.8	0.025	1.8	0.025	1.8	0.025
BGIOSGA001708	0	1	1	1	2	1.8	0.025	1.8	0.123109	1.27917	0.150155
BGIOSGA001709	0	0	0	0	0	1.8	0.025	1.8	0.025	1.8	0.025
BGIOSGA001710	63	19	15	68	58	0.0078539	0.976141	0.0078539	0.991847	4.39024e-07	0.999994
BGIOSGA001711	0	1	2	3	2	1.8	0.025	1.8	0.163616	1.03319	0.235755
BGIOSGA001712	143	152	165	117	133	6.38128e-18	1	6.38128e-18	1	2.03187e-14	1
BGIOSGA001713	19	42	27	26	31	0.0124745	0.965622	0.0124745	0.995002	0.00293157	0.989174
BGIOSGA001714	63	67	66	114	77	2.67959e-07	0.999996	2.67959e-07	1	1.63834e-10	1
BGIOSGA001715	13	8	9	11	10	0.183929	0.742264	0.183929	0.68297	0.190526	0.735853
BGIOSGA001716	15	0	7	9	0	0.233547	0.695975	0.233547	0.025	1.8	0.025
BGIOSGA001717	0	0	0	0	0	1.8	0.025	1.8	0.025	1.8	0.025
BGIOSGA001718	4	0	5	0	1	0.684895	0.392573	0.684895	0.025	1.8	0.025
BGIOSGA001719	0	0	0	0	0	1.8	0.025	1.8	0.025	1.8	0.025
BGIOSGA001720	0	0	0	0	0	1.8	0.025	1.8	0.025	1.8	0.025
BGIOSGA001721	0	0	0	0	0	1.8	0.025	1.8	0.025	1.8	0.025
BGIOSGA001722	459	863	515	803	735	4.2079e-60	1	4.2079e-60	1	6.3458e-97	1
BGIOSGA001723	42	9	24	17	17	0.00167815	0.993122	0.00167815	0.784018	0.0435403	0.90989
BGIOSGA001724	65	149	56	80	81	8.3639e-07	0.999989	8.3639e-07	1	3.64738e-09	1
BGIOSGA001725	95	50	133	35	20	9.02486e-13	1	9.02486e-13	0.999253	0.00584142	0.981152
BGIOSGA001726	42	114	66	120	155	8.47043e-06	0.99992	8.47043e-06	1	9.95743e-16	1
BGIOSGA001727	0	0	0	6	4	1.8	0.025	1.8	0.025	0.636936	0.41823
BGIOSGA001728	0	0	0	0	0	1.8	0.025	1.8	0.025	1.8	0.025
BGIOSGA001729	92	28	97	31	63	8.23287e-11	1	8.23287e-11	0.991381	0.000105396	0.999311
BGIOSGA001730	1173	1435	967	2147	1626	1.55207e-135	1	1.55207e-135	1	5.87388e-241	1
BGIOSGA001731	2850	4520	1932	4526	4633	1.02019e-301	1	1.02019e-301	1	0	1
BGIOSGA001732	7	0	0	0	0	1.8	0.025	1.8	0.025	1.8	0.025
BGIOSGA001733	0	0	1	0	0	1.8	0.025	1.8	0.025	1.8	0.025
BGIOSGA001734	1230	1061	1265	1351	1108	2.21858e-160	1	2.21858e-160	1	2.00757e-156	1
BGIOSGA001735	0	0	0	0	0	1.8	0.025	1.8	0.025	1.8	0.025
BGIOSGA001736	0	0	3	1	0	1.8	0.025	1.8	0.025	1.8	0.025
BGIOSGA001737	0	2	0	0	2	1.8	0.025	1.8	0.025	1.8	0.025
BGIOSGA001738	69	0	51	0	2	1.24711e-06	0.999985	1.24711e-06	0.025	1.8	0.025
BGIOSGA001739	2185	2502	4736	3375	2928	0	1	0	1	0	1
BGIOSGA001740	54	19	32	9	11	0.000149296	0.999077	0.000149296	0.79878	0.21617	0.711702
BGIOSGA001741	0	0	3	0	0	1.8	0.025	1.8	0.025	1.8	0.025
BGIOSGA001742	2	34	14	5	0	0.82913	0.321827	0.82913	0.656616	1.8	0.025
BGIOSGA001743	0	0	0	0	0	1.8	0.025	1.8	0.025	1.8	0.025
BGIOSGA001744	2	7	10	5	6	0.857364	0.309002	0.857364	0.489282	0.556715	0.463871
BGIOSGA001745	0	0	0	0	0	1.8	0.025	1.8	0.025	1.8	0.025
BGIOSGA001746	0	0	6	2	0	1.8	0.025	1.8	0.025	1.8	0.025
BGIOSGA001747	568	615	682	1116	913	1.39966e-77	1	1.39966e-77	1	3.71958e-128	1
BGIOSGA001748	3	2	2	0	0	1.03319	0.235755	1.03319	0.025	1.8	0.025
BGIOSGA001749	26	0	4	2	0	0.408838	0.558642	0.408838	0.025	1.8	0.025
BGIOSGA001750	633	976	694	877	1176	4.16212e-83	1	4.16212e-83	1	3.31121e-128	1
BGIOSGA001751	6	1	0	2	0	1.8	0.025	1.8	0.150155	1.8	0.025
BGIOSGA001752	7883	10753	10558	19361	8869	0	1	0	1	0	1
BGIOSGA001753	568	934	1726	1545	1361	2.12088e-108	1	2.12088e-108	1	5.20502e-187	1
BGIOSGA001754	3	5	243	265	280	0.504789	0.495437	0.504789	0.707985	8.69158e-33	1
BGIOSGA001755	0	1	141	456	443	1.8	0.025	1.8	0.203468	1.89141e-55	1
BGIOSGA001756	2494	3459	2889	3018	2921	0	1	0	1	0	1
BGIOSGA001757	103	108	81	111	110	2.29278e-10	1	2.29278e-10	1	9.90301e-13	1
BGIOSGA001758	383	275	14	38	19	0.00399823	0.986093	0.00399823	0.999998	0.00601566	0.980704
BGIOSGA001759	1176	1931	817	1582	1982	7.64845e-123	1	7.64845e-123	1	9.08739e-229	1
BGIOSGA001760	690	500	1449	487	404	5.7318e-119	1	5.7318e-119	1	1.90524e-54	1
BGIOSGA001761	0	0	0	9	6	1.8	0.025	1.8	0.025	0.386443	0.574434
BGIOSGA001762	0	1	0	0	0	1.8	0.025	1.8	0.025	1.8	0.025
BGIOSGA001763	0	29	0	8	2	1.8	0.025	1.8	0.809045	0.880601	0.298678
BGIOSGA001764	0	0	0	0	0	1.8	0.025	1.8	0.025	1.8	0.025
BGIOSGA001765	0	16	0	7	4	1.8	0.025	1.8	0.704649	0.60004	0.438778
BGIOSGA001766	0	0	0	0	0	1.8	0.025	1.8	0.025	1.8	0.025
BGIOSGA001767	0	0	0	0	0	1.8	0.025	1.8	0.025	1.8	0.025
BGIOSGA001768	1230	1122	1233	1524	1390	2.76098e-158	1	2.76098e-158	1	6.55628e-188	1
BGIOSGA001769	23328	45305	44008	33002	50352	0	1	0	1	0	1
BGIOSGA001770	2	0	2	0	0	1.11896	0.203818	1.11896	0.025	1.8	0.025
BGIOSGA001771	0	0	0	0	0	1.8	0.025	1.8	0.025	1.8	0.025
BGIOSGA001772	0	0	0	0	0	1.8	0.025	1.8	0.025	1.8	0.025
BGIOSGA001773	0	0	0	0	0	1.8	0.025	1.8	0.025	1.8	0.025
BGIOSGA001774	370	49	280	74	25	1.09506e-38	1	1.09506e-38	0.999986	0.000304454	0.998322
BGIOSGA001775	0	0	0	0	0	1.8	0.025	1.8	0.025	1.8	0.025
BGIOSGA001776	1281	2011	957	1785	1719	3.09801e-140	1	3.09801e-140	1	1.13032e-227	1
BGIOSGA001777	0	0	0	0	0	1.8	0.025	1.8	0.025	1.8	0.025
BGIOSGA001778	0	0	2	0	0	1.8	0.025	1.8	0.025	1.8	0.025
BGIOSGA001779	6	0	4	5	2	0.636936	0.41823	0.636936	0.025	0.943133	0.271899
BGIOSGA001780	2	0	0	2	0	1.8	0.025	1.8	0.025	1.8	0.025
BGIOSGA001781	0	0	0	0	0	1.8	0.025	1.8	0.025	1.8	0.025
BGIOSGA001782	0	8	5	9	2	1.8	0.025	1.8	0.644114	0.867853	0.304316
BGIOSGA001783	2824	5040	2697	5288	4087	0	1	0	1	0	1
BGIOSGA001784	2	0	2	0	7	1.11896	0.203818	1.11896	0.025	1.8	0.025
BGIOSGA001785	2724	1865	1753	2787	2662	6.71738e-279	1	6.71738e-279	1	0	1
BGIOSGA001786	0	0	0	0	0	1.8	0.025	1.8	0.025	1.8	0.025
BGIOSGA001787	493	475	760	641	669	9.62375e-75	1	9.62375e-75	1	3.86085e-82	1
BGIOSGA001788	33	4	52	5	0	0.000142237	0.999113	0.000142237	0.392573	1.8	0.025
BGIOSGA001789	842	1938	815	1868	1872	6.44337e-105	1	6.44337e-105	1	1.44151e-243	1
BGIOSGA001790	3034	5295	3293	6307	5328	0	1	0	1	0	1
BGIOSGA001791	31	21	13	9	6	0.0320294	0.928626	0.0320294	0.810867	0.386443	0.574434
BGIOSGA001792	3699	3967	3589	3683	3774	0	1	0	1	0	1
BGIOSGA001793	2489	2363	2266	2502	2107	0	1	0	1	1.1721e-299	1
BGIOSGA001794	304	127	276	119	149	6.05442e-35	1	6.05442e-35	1	2.27678e-15	1
BGIOSGA001795	6	3	11	8	5	0.342764	0.606537	0.342764	0.386662	0.48147	0.510183
BGIOSGA001796	0	1	0	0	0	1.8	0.025	1.8	0.025	1.8	0.025
BGIOSGA001797	250	3616	349	3386	2953	3.381e-35	1	3.381e-35	1	0	1
BGIOSGA001798	141	2	121	12	2	4.07964e-15	1	4.07964e-15	0.316342	0.841121	0.316342
BGIOSGA001799	1293	1532	1086	1532	1628	1.6536e-151	1	1.6536e-151	1	1.49755e-204	1
BGIOSGA001800	6	0	0	0	0	1.8	0.025	1.8	0.025	1.8	0.025
BGIOSGA001801	1087	573	645	783	774	1.85022e-102	1	1.85022e-102	1	2.29181e-98	1
BGIOSGA001802	0	0	0	0	0	1.8	0.025	1.8	0.025	1.8	0.025
BGIOSGA001803	0	0	0	0	0	1.8	0.025	1.8	0.025	1.8	0.025
BGIOSGA001804	36	28	49	13	16	0.000106675	0.999304	0.000106675	0.921123	0.0801454	0.858012
BGIOSGA001805	0	0	0	2	0	1.8	0.025	1.8	0.025	1.8	0.025
BGIOSGA001806	0	0	0	0	0	1.8	0.025	1.8	0.025	1.8	0.025
BGIOSGA001807	12	2	4	2	4	0.49716	0.50022	0.49716	0.203818	0.979689	0.256893
BGIOSGA001808	3693	5199	3426	4484	4006	0	1	0	1	0	1
BGIOSGA001809	0	1	1	2	0	1.8	0.025	1.8	0.150155	1.8	0.025
BGIOSGA001810	960	938	1662	992	2090	2.31679e-156	1	2.31679e-156	1	1.91423e-173	1
BGIOSGA001811	28	56	33	318	537	0.0017853	0.992765	0.0017853	1	5.16152e-49	1
BGIOSGA001812	178	8	26	36	8	3.96135e-05	0.9997	3.96135e-05	0.82534	0.106457	0.82534
BGIOSGA001813	2	5	1	0	0	1.27917	0.150155	1.27917	0.025	1.8	0.025
BGIOSGA001814	62	40	67	48	117	2.72408e-07	0.999996	2.72408e-07	0.999561	1.026e-07	0.999998
BGIOSGA001815	17	0	4	0	0	0.450082	0.530635	0.450082	0.025	1.8	0.025
BGIOSGA001816	239	248	204	203	219	3.20684e-26	1	3.20684e-26	1	4.8311e-25	1
BGIOSGA001817	8	41	8	16	49	0.325973	0.619377	0.325973	0.969944	0.00806057	0.975644
BGIOSGA001818	837	1757	884	1672	2346	4.46639e-109	1	4.46639e-109	1	1.25028e-254	1
BGIOSGA001819	6314	11061	4532	10925	10233	0	1	0	1	0	1
BGIOSGA001820	16787	28494	15678	32422	31805	0	1	0	1	0	1
BGIOSGA001821	0	0	0	0	0	1.8	0.025	1.8	0.025	1.8	0.025
BGIOSGA001822	0	10	0	6	7	1.8	0.025	1.8	0.591715	0.451467	0.529718
BGIOSGA001823	0	0	3	0	0	1.8	0.025	1.8	0.025	1.8	0.025
BGIOSGA001824	0	0	0	0	0	1.8	0.025	1.8	0.025	1.8	0.025
BGIOSGA001825	4	0	9	0	25	0.54714	0.469566	0.54714	0.025	1.8	0.025
BGIOSGA001826	0	2	1	0	0	1.8	0.025	1.8	0.025	1.8	0.025
BGIOSGA001827	1	2	0	1	10	1.8	0.025	1.8	0.150155	1.16034	0.189231
BGIOSGA001828	0	0	133	294	309	1.8	0.025	1.8	0.025	1.82011e-36	1
BGIOSGA001829	600	689	782	763	1006	2.54476e-85	1	2.54476e-85	1	3.99915e-110	1
BGIOSGA001830	34	0	16	7	4	0.0142057	0.961936	0.0142057	0.025	0.60004	0.438778
BGIOSGA001831	41	2	14	10	10	0.0175439	0.955123	0.0175439	0.309002	0.211495	0.716018
BGIOSGA001832	3	5	2	1	0	1.03319	0.235755	1.03319	0.177046	1.8	0.025
BGIOSGA001833	0	0	0	0	0	1.8	0.025	1.8	0.025	1.8	0.025
BGIOSGA001834	8	2	1	3	3	1.16975	0.185984	1.16975	0.235755	0.91658	0.283096
BGIOSGA001835	10	21	8	15	2	0.269284	0.665056	0.269284	0.91747	0.824239	0.324081
BGIOSGA001836	0	1	3	3	0	1.8	0.025	1.8	0.163616	1.8	0.025
BGIOSGA001837	0	0	0	0	0	1.8	0.025	1.8	0.025	1.8	0.025
BGIOSGA001838	470	752	321	735	907	1.05385e-46	1	1.05385e-46	1	8.97018e-103	1
BGIOSGA001839	2108	4073	2466	5312	5055	1.07419e-297	1	1.07419e-297	1	0	1
BGIOSGA001840	8	4	4	1	11	0.570822	0.455582	0.570822	0.171677	1.15683	0.190448
BGIOSGA001841	4	17	4	18	10	0.749572	0.359719	0.749572	0.917262	0.112207	0.818572
[truncated: 38,746 more rows]
